# Supplementary material for: Multimodal human-in-the-loop artificial intelligence with affective feedback for accelerated high-entropy alloy discovery
Source: Royal Society of Chemistry journal article supplement (doi:10.1039/d5mh02327k), 2026-01-01
Supplement: d5mh02327k2.xlsx [file d5mh02327k2.xlsx]

## Sheet: data
title	abstract	authors	publication_year	journal	doi	Material	Composition	Testing Condition	Phase	Research Method	Content of the Study	Performance Indicator	Innovation Point	Conclusion
A novel layered heterogeneous superalloy fabricated by L-DED with superior crack resistance and strength-plasticity synergy	Layered heterostructured materials (LHM) possess excellent comprehensive mechanical properties compared to homogeneous materials. Here, the layered heterostructured Inconel 718/Inconel 738 alloys (LHAs) were fabricated by laser-directed energy deposition (L-DED), which turned out to be crack-free and exhibited excellent strength-plasticity synergy. The microstructures, mechanical properties, and …	Jie Wang,Xiaoqiang Zhang,Ziheng Chang,Xiaolin Bi,Lei Zhang,Xiaoqi Chen,Ruifeng Li	2025	Journal of Alloys and Compounds	10.1016/j.jallcom.2025.179464	Inconel 718/Inconel 738	Inconel 718/Inconel 738 layered heterostructured alloys (LHAs)	room temperature and 850°C	γ matrix with Laves and γ’ precipitates	Null	mechanical properties, strength-plasticity synergy, hetero-layer thickness optimization	UTS = 1180 ± 41 MPa, ETF = 19.0 ± 1.2% (RT); UTS = 730 ± 22 MPa, ETF = 10.3 ± 0.7% (850°C)	layered heterostructure design via laser-directed energy deposition (L-DED), hetero-layer thickness optimization	Optimizing hetero-layer thickness (0.4 mm) enhances hetero-deformation induced (HDI) strengthening, achieving remarkable strength-plasticity synergy in both room and high-temperature conditions.
Carbon-driven microstructural tuning enhances tribological and corrosion performance in FeCoNiCrCx high-entropy alloy films	Harsh marine environment requires mechanical components with superior wear and corrosion resistance. In this study, FeCoNiCrCx high entropy alloy films with varying carbon content were synthesized using reactive magnetron sputtering. By adjusting the carbon content, the microstructure of the films was precisely tailored to enhance their wear and corrosion resistance. As the carbon content increas…	Wei Liu,Chunting Wang,Kun Yang,Xin Jiang,Yongxiang Leng	2025	Carbon	10.1016/j.carbon.2025.120237	FeCoNiCrC	FeCoNiCrCx (carbon content varied to form different phase structures)	marine environment (wear and corrosion resistance tests)	FCC, FCC + amorphous, FCC + amorphous + graphite	reactive magnetron sputtering	wear resistance, corrosion resistance, microstructure tailoring via carbon content adjustment	Friction coefficient reduction, hardness increase with carbon content (toughness decline at highest carbon), corrosion resistance superior to 304 stainless steel	Carbon content-driven microstructure control (FCC → composite → graphite phase), self-supporting characteristics due to high cohesive strength	Optimal wear resistance achieved at intermediate carbon content due to hardness-toughness balance; high-carbon films exhibit lubrication via graphite phase, reducing friction; all films show enhanced corrosion resistance surpassing 304 stainless steel.
Cavitation erosion characterization of Cu-Ni alloy laser cladding layer under the action of high-pressure water jet	The large number of applications of Cu-Ni alloys in the marine field and the prevalence of cavitation erosion (CE) necessitate a thorough examination and improvement of the CE characterization of Cu-Ni alloys. In this study, Cu-Ni alloy cladding layers were prepared by laser cladding technology and compared with the Cu-Ni casting alloy of the same composition. It was found that the grains of the …	Yanru Chang,Zongde Liu,Rong Gan,Hao Xiao,Yue Shen	2025	Journal of Alloys and Compounds	10.1016/j.jallcom.2025.179325	Cu-Ni	Ni25Cu, Ni35Cu, Ni45Cu (Ni content varied from 25% to 45%)	cavitation erosion (CE) testing environment	Null	laser cladding technology	CE resistance, grain refinement, Ni content influence on microstructure and CE performance	Weight loss reduction of 16.8% in cladding layer during CE stabilization.Average weight loss rates: Ni25Cu (81.07 mg/h), Ni35Cu (77.25 mg/h), Ni45Cu (61.21 mg/h).Surface hardness increase due to lattice distortion and dislocation formation.	Laser-cladded Cu-Ni alloy with refined grains vs. casting alloy; Ni content optimization for CE resistance.	Increasing Ni content enhances CE resistance by inducing lattice distortion, promoting grain refinement, and improving surface hardness, which suppresses bubble-induced surface damage and limits defect expansion during CE.
Corrosion of TiHfZrNbx high-entropy alloys in a simulated condition of proton exchange membrane water lectrolyser	In the present work, the corrosion behavior and passive film properties of TiHfZrNbx (x = 0.2, 0.3 and 0.4) highentropy alloys (HEAs) were evaluated under a simulated condition of a proton exchange membrane water electrolyser (PEMWE) in view of their application as bipolar plates. Results from electrochemical-impedance spectroscopy, cyclic- and static-polarizations evaluation revealed that in a 0…	Mariya Kadiri,Ayoub Tanji,Xuesong Fan,Peter K Liaw,T M Indra Mahlia,Hendra Hermawan	2025	Electrochimica Acta	10.1016/j.electacta.2025.145925	TiHfZrNb	TiHfZrNbx (x = 0.2, 0.3, 0.4)	Simulated PEMWE environment (0.5 M H₂SO₄ + 5 ppm F⁻ at 70°C)	Null	Electrochemical impedance spectroscopy (EIS), cyclic/static polarization, X-ray photoelectron spectroscopy (XPS), scanning electron microscopy (SEM), atomic force microscopy (AFM)	Corrosion behavior and passive film properties of TiHfZrNb HEAs, focusing on the role of Hf, Zr, and Nb in enhancing corrosion resistance.	Polarization resistance of TiHfZrNb0.2 reached 79.57 kΩ·cm² (600× higher than CP-Ti), corrosion current density reduced to 0.92 µA·cm⁻² (vs. 805.11 µA·cm⁻² for CP-Ti); passive film exhibited n-type semiconductivity with lower electron-donor concentration than CP-Ti.	Synergistic effect of Hf, Zr, and Nb in forming a protective multi-oxide passive film (HfO₂ > ZrO₂ > TiO₂), with Nb₂O₅ only forming at x=0.4, highlighting Nb’s limited direct role in surface passivation.	TiHfZrNb HEAs demonstrate superior corrosion resistance in acidic PEMWE environments due to a dense passive film dominated by Hf/Zr oxides; increased Nb content indirectly enhances film stability through lattice distortion, despite minimal surface oxide contribution.
Corrosion mechanism of electron beam remelted layer of eutectic high-entropy alloy AlCoCrFeNi2.1	Electron beam remelting technology was used to improve the microstructure of the high-entropy alloy (HEA) AlCoCrFeNi2.1. The results of electrochemical experiments show that the corrosion resistance of the remelted layer on the sample surface is the best under the process conditions of 6 mA + 400 mm/min (remelting parameters). The surface corrosion morphology of the remelted layer of AlCoCrFeNi2.…	Daochen Feng,Yifei Zheng,Wenjian Zheng,Zhihui Cai,Zhangmin Jin,Yinghe Ma,Sendong Ren,Shiyi Bao,Dapeng Tan,Jianguo Yang	2025	Materials Characterization	10.1016/j.matchar.2025.114882	AlCoCrFeNi₂.₁	AlCoCrFeNi₂.₁ (no compositional variation specified)	Corrosion tests under Cl⁻-containing environment, with remelting parameters of 6 mA + 400 mm/min	BCC/B2 + FCC	Electron beam remelting (EBR) technology, electrochemical experiments, corrosion morphology analysis	Corrosion behavior (selective BCC/B2 phase corrosion, FCC phase pitting), effect of remelting on microstructure and corrosion resistance	Optimal corrosion resistance achieved at 6 mA + 400 mm/min remelting parameters; Cl⁻-induced pitting nucleation and BCC phase passivation film thinning observed.	Grain refinement and homogenized elemental distribution via EBR, increasing grain boundary density to enhance corrosion resistance.	EBR significantly refines grains and improves elemental homogeneity, which enhances corrosion resistance by mitigating selective phase corrosion and delaying passivation film degradation; Cl⁻ accelerates matrix dissolution and pitting initiation.
Development and corrosion behavior of electrodeposited FeCoNiMoW and FeCoNiMoWCr high entropy alloy coatings	This study aims to develop FeCoNiMoW and FeCoNiMoWCr high entropy alloys (HEAs) coatings from the electrodeposition route using chloride-based aqueous electrolytes. The corrosion behavior of these electrodeposited coatings was investigated. The co-deposition of all five and six elements in HEA coatings was revealed by the energy dispersive X-ray spectroscopy (EDS) investigation. The scanning elec…	Brij Mohan Mundotiya,Ashwin Shah,Pramendra Burdak,Shrawan Kumar Bairwa	2025	Journal of Alloys and Compounds	10.1016/j.jallcom.2025.179466	FeCoNiMoW, FeCoNiMoWCr	FeCoNiMoW (5-element) and FeCoNiMoWCr (6-element) HEAs	Corrosion tests in chloride-based aqueous electrolytes, compared with nickel aluminum bronze (NAB) substrate	Null	Electrodeposition, energy dispersive X-ray spectroscopy (EDS), scanning electron microscopy (SEM), wettability tests	Corrosion behavior, coating morphology, and Cr’s role in enhancing corrosion resistance	3.53 ± 0.72 µA/cm² (FeCoNiMoWCr coating) 48.69% (anodic protection for NAB substrate)	Electrodeposition of multi-element HEA coatings; Cr-induced formation of protective metallic oxide films	Cr-containing FeCoNiMoWCr HEA coatings exhibit superior corrosion resistance due to Cr-promoted oxide films that impede corrosive ion diffusion, offering effective anodic protection for the NAB substrate.
Effect of Al/Cr ratio on structure, magnetism, and corrosion resistance of FeCoNiCr1-xAlx high entropy alloys	This study investigates the microstructure, magnetic properties, and corrosion resistance of FeCoNiCr1-xAlx (x=0, 0.25, 0.5, 0.75, 1) high-entropy alloys using the combination of experimental methods and first-principles calculations. XRD results reveal the FCC-BCC phase transition as x increases, and FeCoNiCr1-xAlx exhibits a noticeable dual-phase structure when x=0.75. The partial segregation b…	Hongquan Song,Chuangshi Feng,Zhou Guan,Fuxiang Zhang,Huizhong Ma,Zhuang Ma,Yanran Zhang,Xiaoyu Zheng,Wei Zhang,Chaokun Guo,Fuyang Tian	2025	Journal of Alloys and Compounds	10.1016/j.jallcom.2024.177415	FeCoNiCrAl	FeCoNiCr₁₋ₓAlₓ (x = 0, 0.25, 0.5, 0.75, 1)	Potentiodynamic polarization and electrochemical impedance spectroscopy (EIS) under open circuit potential conditions	FCC, BCC, FCC-BCC dual-phase (x=0.75)	XRD, SEM-EDS, potentiodynamic polarization, EIS, first-principles calculations	Microstructure evolution (FCC-BCC transition), magnetic properties (Al content dependence), corrosion resistance optimization	Highest corrosion potential (-0.22 V), lowest corrosion current density (0.12 µA/cm²).EIS corrosion resistance order: Al₀ > Al₀.₅ > Al₀.₇₅ > Al₀.₂₅ > Al₁.BCC phase exhibits stronger magnetism than FCC, increasing with Al content.	Al-induced FCC-BCC phase transition and dual-phase design balancing magnetic and corrosion performance; integration of experimental and computational approaches.	Al₀.₇₅ alloy achieves optimal synergy of soft magnetic behavior and corrosion resistance due to its dual-phase structure, offering a strategic pathway for designing advanced magnetic-corrosion resistant HEAs.
Entropy engineering stimulates the thermoelectric performance of FeCoNiAlSix high-entropy alloys	The present study explores the role of entropy engineering on thermoelectric properties of FeCoNiAlSix high entropy alloys (HEAs) as a function of Si content. The addition of Si content increased mixing entropy, and reduces valance electron concentration, leading to phase transition from dual FCC+BCC phase to single BCC phase. With increasing Si content, the Seebeck coefficient increases due to a…	Cheenepalli Nagarjuna,Hansung Lee,Sheetal Kumar Dewangan,Babu Madavali,Ashutosh Sharma,Byungmin Ahn	2025	Materials Research Bulletin	10.1016/j.materresbull.2025.113404	FeCoNiAlSi	FeCoNiAlSix (Si content varied, e.g., FeCoNiAlSi₀.₆)	Thermoelectric and mechanical property evaluations at elevated temperatures (up to 700 K)	FCC + BCC dual-phase → single BCC phase (with increasing Si content)	Phase analysis, Seebeck coefficient measurement, thermal conductivity testing, hardness measurement	Impact of Si-induced entropy engineering on phase stability, thermoelectric properties (Seebeck coefficient, thermal conductivity), and mechanical hardness	1.202 W/m·K (FeCoNiAlSi₀.₆ at 700 K).0.016 (FeCoNiAlSi₀.₆ at 700 K).520 ±10 → 740 ±10 HV.	Entropy engineering via Si addition to control valence electron concentration, phase structure, and phonon scattering, synergistically enhancing thermoelectric and mechanical performance.	FeCoNiAlSi₀.₆ achieves optimal thermoelectric efficiency (ZT ~0.016) and high hardness (740 HV) through Si-driven single BCC phase formation, lattice distortion-induced phonon scattering, and carrier concentration modulation, validating entropy engineering as a viable strategy for multifunctional HEA design.
High entropy nitride coatings of (TiAlTaZrNb)Nx: Influence of nitrogen content on the microstructural, mechanical and tribological properties	High entropy (TiAlTaZrNb)N coatings were deposited on nitrided H13 steel by magnetron sputtering varying the nitrogen flow (7, 8.5, 10 and 13 sccm). The deposition rate decays with increasing nitrogen flow due to target poisoning. All coatings exhibited a cauliflower-like morphology with dense columnar growths, showing a decreasing trend in roughness and grain size at higher nitrogen fluxes. The …	Daniela M. Chima´ ,Gilberto Bejarano,Francisco Bolivar,Sabine Weiß,Aleksei Obrosov	2025	Materials Chemistry and Physics	10.1016/j.matchemphys.2025.130619	TiAlTaZrNbN	(TiAlTaZrNb)N coatings with varying nitrogen flow (7, 8.5, 10, 13 sccm)	Null	NaCl-type face-centered cubic (fcc)	Magnetron sputtering, scratch test, tribological tests	deposition rate, morphology, mechanical properties, tribological performance	hardness (23.9 GPa), Young’s modulus (254 GPa), H/E ratio, H³/E² ratio, adhesion (LC2=83.9 N), coefficient of friction (0.78), wear rate (5.08×10⁻⁵ mm³/N·m)	varying nitrogen flow during magnetron sputtering	The N10 coating (10 sccm) exhibited the best H/E and H³/E² ratios, highest adhesion (LC2=83.9 N), lowest coefficient of friction (0.78), and wear rate (5.08×10⁻⁵ mm³/N·m), resulting in the best tribological performance.
High-pressure high-temperature melting and recrystallization of nanolamellar high-entropy alloys	Additively manufactured (AM) High Entropy Alloys (HEAs) are notable for their exceptional high-yield strength and large tensile ductility. The nanolamellar Eutectic HEA (EHEA) AlCoCrFeNi2.1 was fabricated by laser powder bed fusion (L-PBF) in the as-printed form (EHEA1) and subsequently annealed at 1000 ◦C (EHEA2) and 600 ◦C (EHEA3) to achieve a broad range of mechanical properties. EHEA2 and EHE…	Kallol Chakrabarty,Andrew D. Pope,Abhinav Yadav,Wuxian Yang,Jie Ren,Vijaya Rangari,Wen Chen,Yogesh K. Vohra	2025	Journal of Alloys and Compounds	10.1016/j.jallcom.2025.179470	AlCoCrFeNi2.1 EHEA	AlCoCrFeNi2.1 in as-printed (EHEA1), annealed at 1000°C (EHEA2), and 600°C (EHEA3)	high-pressure (5.8–6.5 GPa) and high-temperature (1598–1698 K)	B2, L12, and σ phases	Laser powder bed fusion (L-PBF), STEM, EDXRD, nanoindentation, SEM, XRD	phase composition, thermomechanical properties, nanoindentation hardness, high-pressure melting behavior	nanoindentation hardness, elastic modulus, B2-phase content (47% higher in EHEA3), melting temperatures (1598–1698 K), Pressure-Volume-Temperature (P-V-T) data	L-PBF fabrication combined with annealing to tailor phase hierarchy and nanolamellar morphology; high-pressure high-temperature melting experiments	Annealing and high-pressure melting induced σ-phase formation, while retaining B2/L12 phases and nanolamellar morphology. EHEA3 exhibited 47% higher hardness than EHEA2 due to increased B2-phase content. Recrystallized alloys maintained mechanical property hierarchy under extreme conditions.
Influence of surface iron content on the hotoelectrochemical properties of BiFeO films deposited via SCBD	In the present work, composite films consisting of Bi24Fe2O39 nanocrystals and an amorphous iron oxide (FeOx) phase have been fabricated by a pulsed micro-plasma cluster source (PMCS) coupled with supersonic cluster beam deposition (SCBD) on a fluorine-doped tin oxide glass substrate, followed by air annealing. The use of BiFe targets with different composition allowed to tailor the Fe/Bi relativ…	Michele Vergari,Skerxho Osmani,Andrea Basagni，Enrico Scattolin,Martina Rea，Alberto Gasparotto,Gian Andrea Rizzi,Luca Gavioli	2025	Materials Chemistry and Physics	10.1016/j.matchemphys.2025.130600	Bi24Fe2O39/FeOx	Fe/Bi relative concentration (6%–71%) via BiFe targets	KOH aqueous solution, Na2SO3 as holes scavenger	Crystalline Bi24Fe2O39 + Amorphous FeOx matrix	Pulsed micro-plasma cluster source (PMCS), supersonic cluster beam deposition (SCBD), air annealing, electrochemical tests, SEM/EDXRD	OER photoanode performance, charge transfer/injection constants, band gap engineering	Band gap (2.36–2.57 eV), flat band potential (0.39–0.75 V vs RHE), photocurrent enhancement, charge injection efficiency	Tailoring Fe/Bi ratio via BiFe target composition; amorphous FeOx phase for band gap reduction	Higher Fe content improves charge transfer, shifts flat band potential, and enhances photocurrent. Amorphous FeOx reduces band gap (2.36 eV), increases visible light absorption, and boosts hole injection efficiency due to Fe sites’ superiority over Bi.
Microstructure, wear and corrosion properties of laser melted CoCrNiFeTix high-entropy alloy coatings on copper alloys	In this study, CoCrNiFeTiₓ (x = 0.2, 0.5, 1) high-entropy alloy coatings with good bonding to the substrate and low dilution rate were prepared on the surface of white copper alloy by high-speed laser cladding. Investigations have been conducted into the phase structure, hardness, wear resistance, and corrosion resistance of the coatings. The results show that the CoCrNiFeTix high-entropy alloy c…	Haiyang Jia,Xinmei Li,ZhaoShuai Dong，Liming Jia，Heng Luo	2025	Journal of Alloys and Compounds	10.1016/j.jallcom.2025.179674	CoCrNiFeTi	CoCrNiFeTiₓ (x=0.2, 0.5, 1)	3.5% NaCl solution	FCC + BCC + Fe₂Ti intermetallic compounds	High-speed laser cladding, electrochemical corrosion tests, wear resistance analysis	phase evolution, grain refinement, hardness, wear resistance, corrosion resistance	Hardness (273–599 HV), friction coefficient, wear loss/rate, Ecorr (-0.775 V), Icorr (2.396×10⁻⁵ A/cm²)	Titanium addition to tailor phase composition; high-speed laser cladding for low-dilution coatings	Increasing Ti content induces FCC→BCC/Fe₂Ti phase transitions, refines grains, and enhances hardness (599 HV) and wear resistance. Ti1 coating exhibits optimal corrosion resistance (Ecorr=-0.775 V, Icorr=2.396×10⁻⁵ A/cm²) in 3.5% NaCl, demonstrating superior multifunctional performance.
Phase compositions and properties of NbMoTaVTi refractory high-entropy alloy coating on Ti-6Al-4V alloy	To improve the properties of TC4 alloy, NbMoTaVTi refractory high-entropy alloy coating without defects was successfully prepared on the surface of TC4 alloy by laser cladding method. Phase compositions and properties were investigated through various characterization methods. The coating exhibited a dual-phase structure of BCC and HCP. SEM and EDS showed that the coating formed an excellent meta…	Dong Lu,Chao Wang,Jianhong Peng	2025	Intermetallics	10.1016/j.intermet.2025.108642	NbMoTaVTi	NbMoTaVTi refractory high-entropy alloy coating on TC4 substrate	high-temperature oxidation (1000–1200°C), 3.5 wt% NaCl solution	BCC + HCP	Laser cladding, SEM/EDS, high-temperature oxidation tests, electrochemical corrosion tests	phase composition, microhardness, high-temperature oxidation resistance, corrosion resistance	Microhardness (600.62 HV, +57.63% vs substrate), corrosion rate (87.79×10⁻³ mpy vs 258.10×10⁻³ mpy for substrate)	Laser-cladded NbMoTaVTi coating with defect-free BCC+HCP dual-phase structure	The coating exhibits superior microhardness (600.62 HV), high-temperature oxidation resistance (up to 1200°C), and reduced corrosion rate (87.79×10⁻³ mpy) in NaCl, attributed to stable passive films and BCC+HCP dual-phase synergy.
Structure, corrosion resistance and nanomechanical properties of CoCrFeNiX (X=Nb,Mo,B,Si) high entropy alloys	In this work, the four high entropy CoCrFeNiX alloys (X=Nb,Mo,B,Si) were prepared by induction melting to comparatively analyze their structure, nanomechanical properties, and corrosion resistance. The CoCrFeNiNb and CoCrFeNiMo alloys were composed of FCC solid solution and intermetallic phases (TM)2Nb and Cr-Mo-TM. In the case of the CoCrFeNiB alloy, a complex phase structure was revealed, consi…	Rafał Babilas,Jakub Bicz,Adrian Radon´,Mariola Kądziołka-Gaweł,Dariusz Łukowiec,Krzysztof Matus,Edyta Wyszkowska,Łukasz Kurpaska,Darya Rudomilova,Katarzyna Młynarek-Zak	2025	Electrochimica Acta	10.1016/j.electacta.2025.145933	CoCrFeNi	CoCrFeNiX (X=Nb, Mo, B, Si)	3.5% and 5% NaCl solutions	FCC + intermetallic phases ((TM)₂Nb, Cr-Mo-TM), borides (CoCrFeNiB), dual intermetallic phases (CoCrFeNiSi)	Induction melting, electrochemical corrosion tests, EIS, SKPFM, nanomechanical testing	phase composition, nanomechanical properties, corrosion resistance, chemical element distribution	Corrosion current density (icorr=0.24 μA/cm²), corrosion potential (Ecorr=-0.136 V), nanohardness (>15 GPa for Si alloy), Young’s modulus (>275 GPa for B alloy)	Comparative analysis of metalloid (B, Si) vs. refractory metal (Nb, Mo) additions; SKPFM mapping of phase nobility	CoCrFeNiSi exhibits the highest corrosion resistance (icorr=0.24 μA/cm², Ecorr=-0.136 V) due to uniform element distribution and stable passive film. Metalloid additions (B, Si) enhance strength (nanohardness >15 GPa, Young’s modulus >275 GPa), while Mo-rich phases reduce nobility, worsening CoCrFeNiMo’s corrosion.
Decline in pitting corrosion resistance of 316 L stainless steel induced by Cr-depleted layer during tribocorrosion	The pitting corrosion resistance of austenite stainless steel was significantly reduced during tribocorrosion: corrosion pits with high density formed far below pitting potential. The aim of this study is to investigate the effects of tribocorrosion on the metastable pitting corrosion behaviour of 316 L stainless steel. The results indicated that the formation of a Cr-depleted layer on nanocrysta…	Zhongwei Wang; Yinchao Wu; Lijie Qiao; Yu Yan	2025	npj Materials Degradation	10.1038/s41529-025-00569-8	316L stainless steel	Null	Null	nanocrystallized surface (NS)	Null	effects of tribocorrosion on metastable pitting corrosion behaviour, role of Cr-depleted layer	Null	identification of Cr-depleted layer's role in reducing pitting corrosion resistance	The Cr-depleted layer formed during tribocorrosion increased defect density, reduced Cr content in the passive film (weakening chloride resistance), and provided high cation concentration to sustain pit growth, enabling high-density metastable pit initiation at low potentials.
Advancements in high-entropy alloys: Exploring mechanical and corrosion properties of gradient-cast lightweight MgAlCuZnGd multi-component alloys	This study presents the innovative development and characterization of lightweight multi-component alloys (MCAs), specifically MgAlCuZnGd alloys, fabricated using a novel high-throughput gradient continuous casting method. This method marks a significant advancement in alloy processing, allowing for the production of alloy rods with diverse and controlled chemical compositions. The MgAlCuZnGd MCA…	Weili Yao; Muhammad Abubaker Khan; Shang Dai ; Yuxiang Cai; Jinjun Wang; Jingyuan Li	2025	Journal of Alloys and Compounds	10.1016/j.jallcom.2025.179112	MgAlCuZnGd alloys	region V (Mg79.4Al4.5Cu5.3Zn5.8Gd5.0), region VI (Mg79.1Al4.5Cu5.9Zn6.9Gd3.6)	3.5 wt% NaCl	α-Mg phase, MgCuZn phase, Mg2Cu phase, Al2Gd phase, (Mg, Zn)3Gd phase	X-ray diffraction (XRD), scanning electron microscopy (SEM), energy dispersive spectroscopy (EDS), electron backscattering diffraction (EBSD), transmission electron microscopy (TEM)	mechanical properties, microstructure, corrosion behavior	compressive ultimate strength (~474 MPa), ductility (~14.0 %) for region V; corrosion resistance for region VI	novel high-throughput gradient continuous casting method	The gradient continuous casting process and optimized composition enhanced mechanical properties (e.g., strength, ductility) and corrosion resistance, attributed to controlled microstructure, phase distribution, and elemental composition.
Revisiting the Development of Eutectic High-Entropy Alloys over the Past Decade (2014-2024): Design, Manufacturing, and Applications	Eutectic alloys are a class of multi-phase materials named for their formation through eutectic reactions during solidification. They have a long history as the most widely used casting alloys. High-entropy alloys (HEAs), on the other hand, are a novel class of multi-principal element alloys that have rapidly developed since their conceptualization in 2004. Combining the advantages of eutectic al…	WANG Zhijun; BAI Xiaoyu; WANG Jianbin; JIANG Hui; JIAO Wenna; LI Tianxin; LU Yiping	2025	Acta Metallurgica Sinica	10.11900/0412.1961.2024.00250	eutectic high-entropy alloys (EHEAs)	Null	Null	eutectic	Null	alloy design, microstructure/performance optimization, large-scale fabrication, potential applications	Null	combination of eutectic alloys and HEAs	EHEAs exhibit unique microstructures and excellent comprehensive properties, advancing composition design, manufacturing, and applications over the past decade, with insights into future trends.
Mechanical and Electrochemical Corrosion Properties of Mechanical Alloyed NiCoFeCuCrx High-Entropy Alloy	In the study, NiCoFeCuCrx (x = 0.6, 1.0, 1.4) high-entropy alloys (HEAs) had been successfully prepared using the high-energy ball milling and spark plasma sintering (SPS) technology. The microstructure, mechanical properties, and electrochemical properties of the NiCoFeCuCrx HEAs had been examined through scanning electron microscope, universal mechanical testing machine, and an electrochemical …	Wang Xin; Yu Zhaoxu; Liu Cong; Kong Tiantian; Bian Zhiruo; Li Qingning	2025	Journal of Materials Engineering and Performance	10.1007/s11665-025-11081-0	NiCoFeCuCrx (x = 0.6, 1.0, 1.4) high-entropy alloys (HEAs)	NiCoFeCuCrx (x = 0.6, 1.0, 1.4)	Null	Null	scanning electron microscope, universal mechanical testing machine, electrochemical workstation	microstructure, mechanical properties, electrochemical properties	hardness (1046.5 HV to 1746.1 HV), compressive fracture strength (1354.1 to 1484.1 MPa), Ecorr (−0.262 V to −0.071 V), icorr (6.46 × 10⁻⁵ A cm⁻² to 2.95 × 10⁻⁵ A cm⁻²)	high-energy ball milling and spark plasma sintering (SPS) technology	Increasing Cr content enhances hardness (66.9% rise) and corrosion resistance (higher Ecorr, lower icorr) while maintaining compressive strength, attributed to Cr's role in microstructure refinement and passivation.
Corrosion Resistance and Microstructure of FeCrMnAlCux High Entropy Alloys	In this research, a series of high entropy alloys (HEAs) with varying compositions of FeCrMnAlCux (x = 0, 0.5, 1.0, 1.5, 2.0) were synthesized using the vacuum arc melting technique. The results show that the addition of Cu element is beneficial to the formation of FCC phase in the alloys. With an increase in Cu content, the corrosion resistance of FeCrMnAlCux HEAs decreases. When x = 0, the lowe…	Yang Yang; Kai Ma; Li Feng; Mengqi Wang; Yanchun Zhao	2025	Transactions of the Indian Institute of Metals	10.1007/s12666-024-03537-z	FeCrMnAlCux (x = 0, 0.5, 1.0, 1.5, 2.0) high entropy alloys (HEAs)	FeCrMnAlCux (x = 0, 0.5, 1.0, 1.5, 2.0)	Null	FCC	vacuum arc melting technique	corrosion resistance	corrosion current density (7.225 × 10⁻⁷ A/cm² to 8.609 × 10⁻⁶ A/cm²), corrosion potential (−0.475 VSCE to −0.649 VSCE)	addition of Cu element	Cu addition promotes FCC phase formation but reduces corrosion resistance, as higher Cu content increases corrosion current density and lowers corrosion potential due to selective interdendritic corrosion caused by weak Cu-rich passivation films.
Design of L12-type high-entropy intermetallic compounds from L12-strengthened high-entropy alloys	L12-type high-entropy intermetallic compounds (HEICs) have shown great potential as high-temperature structural materials. However, the development of L12-type HEICs is still in its initial stage and no effective method has been established for the composition design of L12-type HEICs. Here, we proposed a novel strategy based on lever rule to design L12-type HEICs, starting from the widely studie…	Ming Huang; Siyi Wu; Shiyu Xu; Qiangqiang Cheng; Lin Hong; Yuan Qin; Sen Yang	2025	Journal of Alloys and Compounds	10.1016/j.jallcom.2024.177606	HEIC-Al14Ti8B1	L12-type HEICs with adjusted B-site elements and 1% boron doping	Null	L12-type intermetallic compound (nearly single-phase)	Lever rule-based design strategy, B-site element reduction, boron micro-alloying	phase formation rules (ΔHmix, δ, VEC criteria), strength-ductility trade-off optimization	Yield strength (642.7 MPa), elongation (15.7%), ΔHmix (-24 to -15 kJ/mol), δ (5.8–7.0%), VEC (8.0–8.5)	Novel lever rule strategy for L12-HEIC design; boron doping to stabilize single-phase L12 structure	HEIC-Al14Ti8B1 achieves superior strength (642.7 MPa) and ductility (15.7%) via B-site tuning and boron doping. L12-type HEICs form within defined ΔHmix (-24 to -15 kJ/mol), δ (5.8–7.0%), and VEC (8.0–8.5), establishing a design framework for high-performance HEICs.
Effect of microstructure on hydrogen absorption in WMoTaNbV high-entropy alloy	The refractory high entropy alloy, WMoTaNbV, absorbs significant quantities of H directly from the atmosphere. The effective hydrogen absorption has been attributed to the elemental composition of the alloy as well as its highly elaborate lattice structure. In this work, we apply scanning electron microscopy and ion beam analysis tools to investigate the effect of grain size and morphology on hyd…	Anna Liski; Marianna Kemell; Tomi Vuoriheimo; Ko-Kai Tseng; Ting-En Shen; Che-Wei Tsai; Jien-Wei Yeh; Kenichiro Mizohata	2025	Nuclear Materials and Energy	10.1016/j.nme.2025.101870	WMoTaNbV	Null	Null	Null	Scanning electron microscopy (SEM), ion beam analysis	hydrogen absorption from atmosphere, effect of grain size/morphology on hydrogen storage	Null	Investigation of microstructure (grain size/morphology) influence on hydrogen absorption in refractory HEA	Microstructure (grain size/morphology) of WMoTaNbV directly correlates with hydrogen absorption efficiency, highlighting the synergy between elemental composition, lattice structure, and microstructural design.
Effects of ZrC content on microstructures and properties of ZrC/AlCoCrFeNi high-entropy alloys composites	In this paper, ZrC/AlCoCrFeNi high-entropy alloy matrix composites were prepared by incorporating ZrC into the AlCoCrFeNi high-entropy alloy using the Spark plasma sintering. The effect of zirconium carbide addition on the microstructure, mechanical properties, and wear behavior was investigated. The introduction of ZrC particles significantly refined the grains of the HEA matrix. When the zircon…	Ji-Dong Zhang; Lan Zhang; Hui Zhong Ma; Na Li	2025	Journal of Alloys and Compounds	10.1016/j.jallcom.2024.178308	ZrC/AlCoCrFeNi	AlCoCrFeNi HEA matrix with 5 wt% ZrC reinforcement	Null	Null	Spark plasma sintering (SPS), microstructure analysis (SEM), hardness/compression testing, wear mechanism characterization	grain refinement, dislocation strengthening mechanisms, wear behavior transition	Hardness (715 HV), compressive strength (2215 MPa), friction coefficient trend, oxide layer thickness comparison	Synergistic strengthening via ZrC-induced grain refinement, dislocation entanglement, and Orowan mechanisms; wear mechanism transition control	5 wt% ZrC/AlCoCrFeNi achieves peak hardness (715 HV) and compressive strength (2215 MPa) through multi-mechanism strengthening. ZrC addition shifts wear mechanisms from adhesive/fatigue to abrasive/oxidative, eliminates wear pit holes, and enhances wear resistance.
Enhanced cryogenic tensile properties in a Fe-high-entropy alloy	Face-centered cubic (FCC) high-entropy alloys (HEAs) typically exhibit excellent ductility and are expected to be used in cryogenic engineering applications. However, their moderate yield strength at cryogenic temperatures (typically below 1 GPa) and the high cost of the alloys limit their application. In this paper, we report a (Fe62Ni16Co9Mn9Ti4)97Si3 Fe-high-entropy alloy (Fe-HEA) with excelle…	Hailong Yi; Cheng Tao; Chao Chen; Jiarui Fan; Shiwei Wang	2025	Journal of Alloys and Compounds	10.1016/j.jallcom.2025.179052	FeNiCoMnTiSi	(Fe62Ni16Co9Mn9Ti4)97Si3 Fe-based high-entropy alloy (Fe-HEA)	Cryogenic tensile testing	FCC → BCC/HCP martensitic transformation + (Fe,Ni)₂SiTi precipitates, nano-twins, stacking faults, Lomer-Cottrell locks	Microstructural analysis (SEM/TEM), tensile testing, phase transformation characterization	cryogenic strength-ductility synergy, multi-mechanism strengthening (heterogeneous structures, martensitic transformation, precipitation)	Yield strength (1325 MPa), ultimate tensile strength (1446 MPa), uniform elongation (20%)	Multi-scale heterogeneous design (bimodal grains, dual phase, martensitic transformation) + nano-precipitates/twinning for cryogenic strength-ductility balance	Fe-HEA achieves exceptional cryogenic yield strength (1325 MPa) and ductility (20% elongation) via synergistic effects of heterogeneous structures, FCC→BCC/HCP transformation, nano-precipitates, and deformation twins. This multi-mechanism strategy enables breakthrough in cryogenic HEA design.
Enhanced migration of mono-vacancies in AlxFeCoCrNi high entropy alloys	A profound understanding of the fundamental properties of point defects in high entropy alloys (HEAs) is essential to predict their irradiation properties. In this work, particle irradiation was performed to produce pointlike defects in the samples, and positron annihilation spectroscopy experiments combined with advanced theoretical modeling to directly reveal the influence of Al content on mono…	Xudong An; Eryang Lu; Ilja Makkonen; Guanying Wei; Jesper Byggmastar ; Jiulong Zhu; Kenichiro Mizohata; Zhehao Chen; Flyura Djurabekova; Wangyu Hu; Huiqiu Deng; Tengfei Yang; Filip Tuomisto	2025	Journal of Alloys and Compounds	10.1016/j.jallcom.2024.177704	AlFeCoCrNi	AlₓFeCoCrNi HEAs (Al content varied to study vacancy migration)	Particle irradiation-induced point defects	Null	Particle irradiation, positron annihilation spectroscopy, theoretical modeling	mono-vacancy migration/recovery mechanisms, Al content effect on energy landscape, radiation tolerance design	Mono-vacancy recovery rates in Al-rich vs. Fe/Cr-rich environments, energy landscape modification	Al addition promotes vacancy recovery via Al-rich environments; trace element modulation of energy landscape for radiation-tolerant alloys	Al enhances mono-vacancy recovery by lowering energy barriers in Al-rich regions, while Fe/Cr-rich regions delay recovery. Tailoring elemental environments via trace elements (e.g., Al) optimizes vacancy dynamics, offering a pathway to design radiation-resistant HEAs.
Enhanced corrosion resistance and gas pore- induced pitting mechanisms of CoCrFeMnNi high entropy alloy fabricated by underwater directed metal deposition with feedstock modification	This study investigates the effect of nitrogen alloying on the corrosion resistance of CoCrFeMnNi high-entropy alloys fabricated by underwater directed metal deposition (UDMD) in 0.6 M NaCl solution. Nitrogen alloying enhanced corrosion resistance by promoting the formation of a dense, Cr-rich passive film with increased thickness and resistivity. The mechanisms of spontaneous passivation and pit…	Mingzhi Chen; Zhandong Wang; Zhiyuan Jia; Chao Xiang; Jibin Pu; Guifang Sun; En-Hou Han	2025	Corrosion Science	10.1016/j.corsci.2025.112716	CoCrFeMnNi	Null	0.6 M NaCl solution	Null	Underwater directed metal deposition (UDMD), electrochemical corrosion testing, passive film characterization (thickness/resistivity)	corrosion resistance mechanisms, passive film evolution, pitting behavior, gas pore influence	Passive film thickness, resistivity, pitting resistance, nitrogen-induced buffering effect	Nitrogen alloying enhances Cr-rich passive film densification; UDMD with powder modification for corrosion-resistant deposition	Nitrogen alloying significantly improves corrosion resistance by forming a dense, thick Cr-rich passive film and mitigating gas pore effects. UDMD combined with nitrogen-modified powder is proposed as a strategy to optimize corrosion-resistant HEAs in chloride environments.
Enhanced dynamic mechanical properties of face-centered cubic CoCrFeNi-based high entropy alloy via coherent L12 nanoprecipitates	It is highly challenging to achieve a combination of high strength, sufficient ductility, and excellent work hardening rate in face-centered cubic high-entropy alloys under high strain rates. In the study, we demonstrate that the presence of coherent nano-scale L12 precipitates can enhance the dynamic compressive yield strength by at least 57.43 % without compromising the ductility and strain har…	Q.W. Tian; J.L. Chen; J.X. Song; M. Wang; S.S. Wu; S.Y. Liang; P.F. Zhang; L.F. Xie; J. Tian; Z. Chen; X.T. Zhong; G. Kou; J.K. Feng; Y.N. Wang; X.W. Cheng	2025	Materials Science & Engineering A	10.1016/j.msea.2025.147972	FCC-based HEA	Null	Dynamic compression at high strain rates (1000–4000 s⁻¹)	FCC matrix + coherent nano-scale L12 precipitates	Dynamic compression testing, TEM analysis (dislocation slip systems, precipitates)	dynamic mechanical properties, dislocation slip/cross-slip mechanisms, strain hardening capacity	Dynamic yield strength increase (≥57.43%), strain hardening rate, dislocation cross-slip activation	Nano-L12 precipitates simultaneously enhance strength and ductility via impeding dislocation glide while stimulating multi-slip systems	Coherent nano-L12 precipitates in FCC HEAs boost dynamic yield strength by ≥57.43% without sacrificing ductility. They restrict dislocation glide on primary slip planes while promoting cross-slip and multi-slip activation, enabling superior strain hardening and balanced dynamic mechanical performance.
High temperature oxidation behavior and mechanism of MoNbVTa0.5Crx refractory high entropy alloys	The oxidation behavior of MoNbVTa0.5Crx (x = 0.25–1) refractory high entropy alloys (RHEAs) at 800 ℃ was studied. The oxidation resistance of the alloy significantly increased with the increase of Cr content. Due to the formation of dense CrNbO4/CrTaO4 oxide layers, MoNbVTa0.5Cr alloy exhibited promising oxidation resistance, with a specific mass gain of 47.76 mg/cm2 after 36 h of oxidation in ai…	Mingyi Guo; Liujie Xu; Yunchao Zhao; Shengqiang Deng; Zhou Li; Shizhong Wei	2025	Corrosion Science	10.1016/j.corsci.2024.112672	MoNbVTaCr	MoNbVTa0.5Crx (x=0.25–1)	at 800–1100 ℃ in air	Null	Null	oxidation behavior	specific mass gain of 47.76mg/cm² after 36 h at 1100 ℃, parabolic oxidation kinetics	addition of Cr promoting dense CrNbO4/CrTaO4 oxide layers	Increased Cr content enhances oxidation resistance via dense oxide layers and oxygen inward diffusion mechanisms.
Hydrogen embrittlement and corrosion resistance of NiCoCr-based equimolar face-centered cubic medium-/high-entropy alloys	By studying several NiCoCr-based equiatomic medium-/high-entropy alloys (M/HEAs) with single face-centered cubic structures, in this work, we systematically investigated the key factors affecting the hydrogen embrittlement (HE) of these alloys, with particular emphasis on the deformation mechanism, hydrogen adsorption, hydrogen diffusion, and grain boundary chemistry. The FeNiCoCr HEA was signifi…	Zihui Guo; Ming Liu; Yuan Ma; Hang Yu; Sirui Jing; Yu Yan	2025	Corrosion Science	10.1016/j.corsci.2025.112700	NiCoCr-based (Fe, Mn)	Equiatomic FeNiCoCr HEA and Mn-alloyed variants	in acidic media and chloride solutions	FCC	Null	Factors influencing hydrogen embrittlement (HE), including deformation mechanisms, hydrogen adsorption/diffusion, and grain boundary chemistry	Lowest hydrogen concentration in FeNiCoCr, reduced passivation film resistance in Mn-containing alloys	Cr segregation enhancing HE resistance; Mn alloying degrading HE and corrosion resistance	FeNiCoCr exhibits superior HE resistance due to Cr segregation and low hydrogen uptake, while Mn addition deteriorates performance.
Influence of Cr and Al contents on the corrosion resistance of FeCrAl coatings on Zry-4 under simulated Pressurized Water Reactor conditions	This study explores the impact of Cr (13 wt%, 23 wt%) and Al (3 wt%, 5 wt%, 7 wt%) content on the corrosion resistance of FeCrAl coatings deposited on Zry-4 substrates via magnetron sputtering, under simulated pressurized water reactor (PWR) conditions (360 ◦C, 18.6 MPa). The findings reveal that increasing Cr and Al content enhances the density and mechanical strength of the coatings, with Cr pl…	Xiaohan Deng; Haiyan Liao; Weijiu Huang; Haibo Ruan; Yuan Niu; Kangkai Yan; Pengzhou Zhu; Xiangkong Xu; Yongyao Su	2025	Applied Surface Science	10.1016/j.apsusc.2024.162113	FeCrAl	FeCrAl coatings with Cr (13 wt%, 23 wt%) and Al (3 wt%, 5 wt%, 7 wt%)	Simulated PWR conditions (360 °C, 18.6 MPa)	FeFe₂₋ₓ₋ᵧCrₓAlᵧO₄ spinel	Magnetron sputtering deposition, first principles simulations (H₂O adsorption analysis)	Impact of Cr/Al content on corrosion resistance and oxide layer formation	Reduced Fe₂O₃ formation, denser spinel layer blocking Fe diffusion/corrosive penetration, enhanced coating stability via H₂O adsorption simulations	Optimized Cr content (23 wt%) enabling dense Cr-rich spinel layer for superior corrosion resistance	High Cr content (23 wt%) in FeCrAl coatings significantly enhances corrosion resistance under PWR conditions by forming a protective spinel layer, with Cr playing a more critical role than Al in performance optimization.
Interface-dependent dynamic deformation behavior in FCC/BCC high-entropy alloy nanolaminates	Dual-phase high-entropy alloys (DP-HEAs), characterized by an alternation of soft and hard phases, are expected as promising candidates for structural applications, owing to their remarkable combination of high strength and ductility. However, the role of phase interfaces in the dynamic deformation of these nano lamellar systems remains poorly elucidated, primarily because of the challenges perti…	Hongcai Xie; Zhichao Ma; Wei Zhang; Chuangfeng Zhu; Xiaoyu Cai; Hongwei Zhao; Luquan Ren	2025	Applied Surface Science	10.1016/j.apsusc.2024.162093	FeCoNiCuAl	FeCoNiCuₓAl₁₋ₓ HEA nanolaminates	FCC/BCC dual-phase, HCP phase transformation, twinning	Large-scale molecular dynamics (MD) simulations	Large-scale molecular dynamics (MD) simulations	Dynamic deformation mechanisms, shock wave-phase interface interactions, phase transitions, and twinning behavior	Formation of immobile Hirth dislocations, strain-hardening effect, energy dissipation via HCP transformation/twinning, layer thickness-dependent plastic deformation	Cu/Al ratio and layer thickness manipulation to dynamically control phase transitions, twinning, and interface interactions	Phase interfaces and compositional/layer design govern dynamic deformation through dislocation reactions, phase transitions, and energy dissipation, guiding the development of HEAs for impact-resistant applications.
Investigation of tribological properties of heat-treated ZrNbTiVAl high entropy alloy in dry sliding conditions	This study explored the relationship between tribological performance and microstructural changes induced by heat treatment in a newly developed ZrNbTiVAl high-entropy alloy (HEA). The alloy was evaluated in its as-cast state and after heat treatments at 950 ◦C for 15, 20, and 25 h, with dry sliding experiments conducted against an alumina ball counterface. Advanced analytical techniques, includi…	Neelima Khare; Poulami Chakraborty; Satish Chandra Mishra; Anurup Das; Praveen Kumar Limaye; Mahender Dev; Raghvendra Tewari	2025	Intermetallics	10.1016/j.intermet.2024.108573	ZrNbTiVAl	ZrNbTiVAl (as-cast and heat-treated at 950°C for 15, 20, 25 h)	Dry sliding against alumina ball counterface	Null	3D optical profilometry, nanohardness testing, FESEM/EDS, MicroRaman spectroscopy	Tribological performance and microstructural evolution under heat treatment	Hardness (H), elastic modulus (E), wear rate, friction coefficient, wear mechanism shift (adhesive/oxidative to severe)	Optimizing heat treatment duration to enhance tribological properties via Ti/V enrichment and reduced Al-Zr intermetallic formation	Shorter heat treatment (as-cast/15 h) improves wear resistance by promoting Ti/V-rich oxide layers and minimizing hard debris, despite lower H/E and H³/E² ratios.
Mechanical and corrosion behavior of CoCrFeNiAl0.3 high entropy alloy seamless tubes	An urgent need arises for alloys that possesses superior ductility and good corrosion resistance, essential for applications in highly harsh environmental conditions. The corrosion resistance and mechanical properties of CoCrFeNiAl0.3 high-entropy alloy seamless tubes (HEASTs) are investigated in this study. Electron Channeling Contrast Imaging (ECCI) and Electron Backscatter Diffraction (EBSD) t…	Yaqi Wu; Yuanying Yue; Xuehui Yan; Cheng Zhang; Jinfeng Huang; Peter K. Liaw; Yong Zhang	2025	Journal of Alloys and Compounds	10.1016/j.jallcom.2024.177143	CoCrFeNiAl	CoCrFeNiAl₀.₃ high-entropy alloy seamless tubes (HEASTs, e.g., TR-22)	Null	B2 phase	Electron Channeling Contrast Imaging (ECCI), Electron Backscatter Diffraction (EBSD), X-ray photoelectron spectroscopy (XPS)	Corrosion resistance and mechanical properties of HEA seamless tubes	Pitting corrosion resistance linked to B2 phase content; TR-22 tubes exhibit superior resistance due to lower B2 content and protective passive film	Microstructural optimization via controlled B2 phase content to balance corrosion resistance and mechanical performance	Lower B2 phase content and formation of Al/Cr/Fe-enriched passive film enhance corrosion resistance, highlighting the critical role of B2 phase control in optimizing HEASTs for harsh environments.
Mechanical property and improved oxidation resistance of refractory high entropy alloy fabricated by laser directed energy deposition	NbMoTaWZr refractory high-entropy alloy prepared by laser directed energy deposition exhibited excellent mechanical properties both at room and 1200 ℃. Microstructure and phase were systematically investigated. However, poor oxidation resistance remains a critical limitation for application. In this research, we explored the improvement of oxidation resistance through pack cementation Si to facil…	Ming Xia; Yuhui Jiang; Xiyu Yao; Peng-fei He; Jia Shao; Yongxiong Chen; Baolong Shen; Xiubing Liang	2025	Corrosion Science	10.1016/j.corsci.2024.112601	NbMoTaWZrSi	NbMoTaWZr with Si addition via pack cementation	High-temperature oxidation (implied ≥1200°C)	SiO₂ (external scale), (Si,Zr)O (internal layer)	Pack cementation Si deposition, oxidation resistance evaluation	Oxidation resistance enhancement through Si-modified protective scale formation	Dense SiO₂ external scale and (Si,Zr)O internal layer inhibiting oxygen inward diffusion	Si incorporation via pack cementation to form dual-layer protective oxide scales	Si addition significantly improves oxidation resistance by forming oxygen-blocking SiO₂ and (Si,Zr)O layers, enabling NbMoTaWZr RHEA applications in extreme high-temperature environments.
Microstructure and properties of CuCrNixTiZr high entropy alloys: Experiments and first principles calculations	In this work, the structural stability, elastic properties, density of states and differential charge density of CuCrNixTiZr (x = 0.5, 1.0, 1.5, 2.0) high entropy alloys (HEAs) were simulated, with the first-principles methods based on plane-wave pseudopotential theory. The simulation results show that with the increase of Ni content, the density of the HEAs decreases, the lattice constant increa…	Haiyang Kang; Xiaohong Yang; Xiaoyong Sun; ChongYang Wang; Peng Xiao	2025	Journal of Alloys and Compounds	10.1016/j.jallcom.2024.177873	CuCrNiTiZr	CuCrNiₓTiZr (x=0.5,1.0,1.5,2.0)	Null	FCC + BCC	First-principles simulations (plane-wave pseudopotential theory), vacuum arc melting, compression experiments	Structural stability, elastic/mechanical properties, electronic structure (density of states, charge density), and microstructure evolution with Ni content	Lattice constant (increasing with Ni), compressive strength (1052 MPa at x=2.0), elongation (18% at x=2.0), elastic constants, ground state energy, heat of formation	Combined computational-experimental approach to correlate Ni content with structural/mechanical properties and bonding behavior	Higher Ni content enhances compressive strength, elongation, and FCC phase stability via strengthened metal bonding, validated by alignment between simulation (electronic structure) and experimental (microstructure/mechanical) results.
Rhenium alloying strengthens a ductile refractory high entropy alloy	Strengthening alloys at both ambient and elevated temperatures without compromising room temperature ductility remains a significant challenge in the structural materials field. Recently, we reported a ductile NbTaTi based refractory high-entropy alloy (RHEA) capable of maintaining high strength up to 1200◦C. In this study, we demonstrate that adding 1 at. % Re to this alloy provides further stre…	Xichen Zhou; Qianyong Zhu; Xiao Liang; Qihan Jia; Cheng Zhang; Shiteng Zhao; Hongbo Guo	2025	Scripta Materialia	10.1016/j.scriptamat.2024.116464	NbTaTiRe	NbTaTi + 1 at.% Re	Ambient temperature and 1300°C (implied)	Heterogeneous lamella structure (coarse/fine grains)	Re alloying, partial recrystallization, tensile testing	Strengthening mechanisms via Re addition and microstructure optimization for multi-temperature performance	Yield strength increased to 841–1278 MPa (+48–126%) and elongation to 14.7–22.5% (+539–878%); strength-ductility synergy surpasses FCC+B2 EHEAs.	Combined Re alloying and heterogeneous lamella structure design for strength-ductility synergy	Re addition and lamellar microstructure enhance NbTaTi-based RHEA strength (>1 GPa RT, 150 MPa at 1300°C) without sacrificing ductility/machinability.
Screening the TiZrHfNbVMoTa refractory high-entropy alloys with multi-property constraints	Refractory high-entropy alloys with exceptional high-temperature mechanical properties have attracted increasing interest in aerospace applications. However, the presence of multiple principal alloying elements presents a challenge in finding an appropriate and cost-effective alloy for specific applications. A multi-property composition design method combining machine learning and thermodynamic c…	Ruixia Sun; Haiqing Yin; Jie Liu; Shuyi Xie; Cong Zhang; Ruijie Zhang; Yongwei Wang; Dil Faraz Khan; Xuanhui Qu	2025	Journal of Alloys and Compounds	10.1016/j.jallcom.2025.179284	TiZrHfNbVMoTa	TiZrHfNbVMoTa (multi-component)	Room temperature compression testing	Null	Machine learning, thermodynamic calculations (CALPHAD), multi-property composition design	High-throughput screening of RHEAs, compressive strength-ductility synergy evaluation	Fracture strain >60%, yield strength 1051 ± 23 MPa at RT	Machine learning coupled with thermodynamics to efficiently screen RHEAs from vast compositional space	The proposed method successfully identified TiZrHfNbVMoTa RHEAs with exceptional strength-ductility synergy, validating its efficacy for cost-effective RHEA design in aerospace applications
Simplifying the microstructure and improving the corrosion resistance of the FeCoCrNiNbx high-entropy alloys via homogenizing annealing heat treatment	FeCoCrNiNbx high-entropy alloys were subjected to a homogenizing annealing heat treatment at 1200 ℃ for 4 h, which simplified the microstructure of the alloys and reduced the degree of compositional segregation. After heat treatment, FeCoCrNi alloy still maintained the single-phase FCC structure, and the grains grew into coarser columnar crystals reducing the number of grains; the intergranular e…	Chang Liu; Decheng Kong; Qingbiao Tan; Jian He; Rui Wang; Guoliang Zhu; Baode Sun; Yong Zou	2025	Journal of Alloys and Compounds	10.1016/j.jallcom.2025.178565	FeCoCrNiNb	FeCoCrNiNbₓ (x=0, 0.15, 0.33, 0.5)	Corrosion testing in 3.5 wt% NaCl solution	FCC(single-phase for FeCoCrNi), reduced Laves phase (FeCoCrNiNbₓ), Ostwald ripening (FeCoCrNiNb₀.₅)	Homogenizing annealing (1200°C/4 h), thermodynamic phase diagram calculations, electrochemical corrosion analysis	Microstructure simplification, work function (WF) enhancement, passive film optimization, and corrosion resistance mechanisms	Homogenizing annealing increased work function (WF) by ~100% with homogenized WF distribution, reduced passivation current density by over an order of magnitude, improved repassivation tendency, and induced FCC grain coarsening (FeCoCrNi) alongside significant Laves phase reduction (FeCoCrNiNbₓ).	Homogenizing annealing-induced Ostwald ripening and passive film densification synergistically enhance corrosion resistance	1200°C/4 h annealing optimizes microstructure (FCC stability, Laves phase reduction) and passive film compactness, drastically improving corrosion resistance in NaCl, guided by thermodynamic phase design principles
Size-dependent pitting corrosion behavior for L12-strengthened high-entropy alloys	This work thoroughly investigated the effects of the L12 size upon the corrosion behavior for L12-strengthened HEAs. Compared with the single-phase homogenized HEA, HEAs strengthened by small-sized L12 exhibited higher pitting potential (Epit). Nevertheless, with the L12 coarsening, Epit decreases markedly. The exceptional corrosion behavior for small-sized L12-strengthened HEAs was attributed to…	Tianrun Li; Debin Wang; Jingping Cui; Ning Li; Suode Zhang; Jianqiang Wang	2025	Corrosion Science	10.1016/j.corsci.2025.112679	L12-strengthened HEA (specific elemental composition not provided)	Null	Pitting corrosion testing (likely in NaCl solution, implied by pitting potential focus)	FCC matrix + L12 precipitates (size-dependent: small vs. coarse)	Corrosion behavior analysis (pitting potential measurement, film characterization)	Impact of L12 precipitate size on pitting resistance, repassivation kinetics, and passive film homogeneity	Small L12 precipitates increase pitting potential (E<sub>pit</sub>) and enable rapid Cr-enriched repassivation; coarse L12 reduces E<sub>pit</sub> due to incomplete dissolution and heterogeneous passive films.	Linkage of L12 precipitate size to corrosion resistance via dissolution-repassivation dynamics and passive film uniformity	Smaller L12 precipitates enhance corrosion resistance by promoting rapid FCC matrix repassivation and uniform Cr-rich passive films, while coarsening L12 degrades resistance via heterogeneous film formation and reduced pitting tolerance.
Refractory high entropy TiTaZrHfW-N/Si3N4 nano-layered alloy thin film’s oxidation resistance	Refractory high entropy TiTaZrHfW-N/Si3-N4 nano-layered alloy thin films are investigated to study the effect of nano-layered architecture and silicon (Si) mean content on their structural, mechanical, thermal properties and oxidation behavior. The films are deposited using direct current (DC) magnetron sputtering of separate Si and TiTaZrHfW targets. The Si mean content is controlled by tailorin…	Abdelhakim Bouissil; Sofiane Achache; Djallel Eddine Touaibia; Jaafar Ghanbaga; Pavel S. Postnikov; Mohamed M. Chehimi; Benoit Panicaud; Fabrice Parent; Frederic Sanchette; Mohamed El Garah	2025	Journal of Alloys and Compounds	10.1016/j.jallcom.2024.177046	TiTaZrHfW-Si₃N₄	TiTaZrHfW-N/Si₃N₄ nano-layered thin films with variable Si content (controlled via sputtering power)	Oxidation at 600–800°C, annealing at 900°C (vacuum)	Nanocrystalline FCC TiTaZrHfW-N (NaCl-type) + amorphous Si₃N₄ nano-layers	DC magnetron sputtering (dual TiTaZrHfW/Si targets), annealing, oxidation testing, structural/mechanical characterization	Impact of Si₃N₄ nano-layer thickness (periodicity) and Si content on hardness, thermal stability, and high-temperature oxidation resistance	Post-annealed Si-free films achieve super-hardness of 41 GPa, while increasing Si content reduces hardness but enhances oxidation resistance at 600–800°C via thicker Si₃N₄ layers and higher layer periodicity; all coatings exhibit thermal stability after 900°C annealing	Nano-layered architecture combining ceramic (Si₃N₄) and metallic (TiTaZrHfW-N) layers for tunable mechanical/oxidation properties	Si₃N₄ nano-layers enhance oxidation resistance at elevated temperatures, while annealing boosts hardness in Si-free films. Optimizing layer periodicity and Si content balances mechanical strength and oxidation performance for high-temperature applications
Synergistic influence of L12 precipitates on the mechanical properties and corrosion resistance of CoCrFeNi2-based high entropy alloys	This study fabricated a series of CoCrFeNi2-based high entropy alloys with L12 precipitates, achieving synergistic improvements in mechanical properties and corrosion resistance. The increase in strength is primarily attributed to precipitation strengthening. Corrosion resistance is improved by the L12 precipitates, which enrich the FCC phase with chromium, thereby enhancing the concentration of …	K.W. Kang; A.X. Li; B.R. Zhang; J.S. Zhang; M.K. Xu; D. Huang; S.K. Liu; Y.T. Jiang; G. Li	2025	Corrosion Science	10.1016/j.corsci.2025.112781	CoCrFeNi₂-based HEA	CoCrFeNi₂ + L₁₂ precipitates (exact stoichiometry unspecified)	Null	FCC matrix + L₁₂ precipitates	Alloy fabrication, mechanical/corrosion testing, first principles calculations (work function, surface adsorption energy)	Synergistic enhancement of strength and corrosion resistance via L₁₂ precipitates, linking microstructural and electronic effects	Increased strength (precipitation strengthening) and improved corrosion resistance (enriched Cr₂O₃ in passive film, high work function, low adsorption energy of L₁₂)	Dual mechanical-corrosion optimization via L₁₂ precipitates, validated by computational insights into electronic properties	L₁₂ precipitates in CoCrFeNi₂-based HEA enhance strength (precipitation hardening) and corrosion resistance (Cr enrichment, favorable electronic properties), demonstrating multi-property synergy for advanced applications
The role of hydrogen in the synthesis of High-entropy alloys and their hydrides	The aim of this work is to present the new technique processes of formation of stable hydrides of High-entropy alloys(HEAs) with high hydrogen content. The essence of the proposed method is the sequential use of self-propagating high-temperature synthesis (SHS) method for producing the metal hydrides, followed by the formation of alloys in the hydride cycle (HC) method. Preliminary, the hydrides …	Garnik Muradyan; Seda Dolukhanyan; Ofelya Ter-Galstyan; Nune Mnatsakanyan; Salavat Khasanov; Karine Asatryan; Sona Mardanyan; Armen Hovhannisyan	2025	Journal of Alloys and Compounds	10.1016/j.jallcom.2024.177327	TiZrHfVNb-Mg	Ti₀.₂Zr₀.₂Hf₀.₂V₀.₂Nb₀.₂ Ti₀.₃Zr₀.₁₅Hf₀.₁₅V₀.₂Nb₀.₂ Ti₀.₃Zr₀.₁Hf₀.₁V₀.₂Nb₀.₂Mg₀	Hydrogenation at P<sub>H2</sub> = 5–30 atm (cyclic stability tested over 1–3 cycles)	BCC-structured HEAs and their hydrides	Self-propagating high-temperature synthesis (SHS), hydride cycle (HC), hydrogenation-dehydrogenation cycling, structural analysis (BCC phase confirmation)	Synthesis of HEA hydrides via SHS-HC synergy, hydrogen storage capacity, cyclic stability, and formation mechanisms	Hydrogen content of 2.17–2.42 wt%, H/Me ratio of 1.82–2.05, exceptional cyclic stability with reversible hydrogen storage over 1–3 cycles.	SHS-HC integrated method enables energy-efficient, waste-free synthesis of BCC HEAs and their hydrides with high hydrogen capacity and cyclability	The SHS-HC strategy successfully produces BCC-structured HEA hydrides (e.g., Ti₀.₂Zr₀.₂Hf₀.₂V₀.₂Nb₀.₂H₂.₀₅) with high hydrogen content (>2 wt%) and stability, demonstrating industrial potential for solid-state hydrogen storage in renewable energy systems
The role of molybdenum in the passivating oxidation of CoFeNiMo high entropy alloys	In recent years, with the increasing requirement for coating materials, researchers have shown growing interest in the high-temperature (HT) oxidation performance of high entropy alloys (HEAs). To understand the contribution of alloying element to the passivation and dissolution characteristics of HEAs is crucial for comprehending the synergistic effects of these elements. As a common refractory …	Panhua Shi; Yuanwen Li; Jianqiao Yu; Zhen Xie; Jiaxuan Si; Yuexia Wang	2025	Journal of Alloys and Compounds	10.1016/j.jallcom.2024.177026	Mo-containing HEAs	Null	High-temperature oxidation (implied, exact parameters unspecified)	Secondary phases (Mo-induced), oxide scale formation (non-protective vs. Cr₂O₃)	Density Functional Theory (DFT), Monte Carlo (MC), Local Self-consistent Multiple Scattering (LSMS), microstructural/thermodynamic simulations	Mechanistic role of Mo in passivation vs. Cr, lattice distortion/oxygen-induced expansion effects, grain boundary (GB) ductility analysis	Mo reduces bulk mechanical properties (lattice distortion) but enhances GB ductility; oxide scales less protective than Cr-rich counterparts	Design principles for Mo-containing HEAs balancing chemical affinity, atomic size, and microstructure to optimize oxidation resistance and mechanical performance.	Mo’s role in passivating oxidation diverges from Cr, necessitating tailored design to mitigate lattice distortion while leveraging GB ductility. Proposed principles aim to enhance oxidation resistance in Mo-modified HEAs for high-temperature applications.
In-situ alloying of nonequiatomic TiNbMoTaW refractory bio-high entropy alloy via laser powder bed fusion: Achieving suppressed microsegregation and texture formation☆	High-entropy alloys (HEAs) have attracted considerable attention owing to their excellent properties. However, the severe segregation of the constituent elements remains a common challenge in refractory HEAs. Recently, an approach to suppress segregation was proposed using laser powder bed fusion (LPBF) owing to the ultra-high cooling rates during solidification. Despite the advantages of LPBF, t…	Yong Seong Kim; Ozkan Gokcekaya; Kazuhisa Sato; Ryosuke Ozasa; Aira Matsugaki; Takayoshi Nakano	2025	Materials & Design	10.1016/j.matdes.2025.113824	TiNbMoTaW				Laser powder bed fusion (LPBF) in-situ alloying	microsegregation suppression and texture formation	mechanical strength	first successful control of crystallographic texture in BioHEAs via in-situ alloying	It showed superior mechanical strength and equivalent biocompatibility compared to conventional biomaterials, indicating its superiority as a biomaterial.
Mixing-enthalpy modulation on phase transformation in the gradient chemical core/shell high-entropy shape-memory alloys	High-entropy alloys (HEAs) are of more chemical inhomogeneity than traditional alloys. How thermal effects perturb entropy and chemical fluctuations is a major scientific issue. In this study, selected benchmark phenomena revealed by in-situ synchrotron X-ray mapping demonstrates how local chemical gradients control temperature-dependent behaviors in HEAs. Specifically, the gradient chemical laye…	E-Wen Huang; Tu-Ngoc Lam; Zachary H. Aitken; Mao-Yuan Luo; Nien-En Chiang; Yuh Sun; Jo-Chi Tseng; Ching-Yu Chiang; Wan-Zhen Hsieh; Wen-Jay Lee; Yong-Wei Zhang; Peter K. Liaw; Che-Wei Tsai	2025	Materials & Design	10.1016/j.matdes.2025.113623	CuNiTiHfZr	Cu15Ni35Ti50-x(HfZr)x		martensitic	in-situ synchrotron X-ray mapping	phase transformation in gradient core/shell high-entropy shape-memory alloys	high-temperature shape-memory stability	revealed role of gradient chemical core/shell structure on martensitic transformation in HEAs	Our findings are conducive to a potential design strategy of tailoring gradient chemical core/shell HEAs for stable high-temperature shape-memory applications.
Corrosion behavior of a high-entropy AlCrFeNiMn alloy in a high-temperature supercritical CO2 environment	A high-entropy AlCrFeNiMn alloy (AM-HEA) was corroded in a high-temperature supercritical CO2 environment at 500 °C and 25 MPa. The AM-HEA has a duplex structure with Ni,Al-enriched α region domains surrounded by Fe,Cr-enriched B2 region domains. The B2 region experienced severe corrosion, leading to the formation of large-faceted Mn-rich oxides on the exterior and flocculent oxides in the interi…	Wanhuan Yang; Xueli Zhao; Jichun Zou; Mengyao Chen; Qi Liu; Wen Yang; Shen Li; Pengrui Qiao; Weihua Zhong	2025	Materials & Design	10.1016/j.matdes.2025.113622	AlCrFeNiMn		Supercritical CO2 at 500°C and 25 MPa	α and B2	corrosion test in supercritical CO2 environment	corrosion behavior in supercritical CO2	corrosion resistance	investigated HEA corrosion under supercritical CO2, revealing phase-dependent oxidation	A uniform, thin Al2O3 layer developed as a subsurface layer on both structures, enhancing the corrosion resistance of the AM-HEA.
Exploration for the physical origin and impact of chemical short-range order in high-entropy alloys: Machine learning-assisted study	Atomic-level chemical short-range order (CSRO) in high-entropy alloys (HEAs) has ever garnered increasing attention. However, the mechanisms underlying the effects of CSRO remain poorly understood. Material informatics, through a machine learning (ML) algorithm, can fit the high-dimensional correlation between features well and provide an approach for elucidating complex mechanisms. In this study…	Panhua Shi; Zhen Xie; Jiaxuan Si; Jianqiao Yu; Xiaoyong Wu; Yaojun Li; Qiu Xu; Yuexia Wang	2025	Materials & Design	10.1016/j.matdes.2025.113892	FeCoNiTi				machine learning and first-principles calculations	chemical short-range order (CSRO) and its effect on properties	ideal strength	identified electronic orbital factors dominating atomic stress in HEAs with CSRO	t2g orbitals predominantly determine atomic stress in HEAs with CSRO, and a closely packed CSRO configuration significantly improves the ideal strength compared to a fully random structure.
Strengthening mechanism and low-temperature hardening behavior of high-entropy alloy/graphene composite	High-entropy alloy/graphene composites (HEA/Gr) have shown significant potential in various applications due to their exceptional mechanical properties. In this study, the mechanical properties and deformation mechanisms of CoCrFeMnNi/graphene composites were systematically investigated using molecular dynamics simulations. The results showed that graphene can effectively hinder dislocation movem…	Shaocong Zhou; Yongchao Liang; Yuanwei Pu; Yu Zhou; Lili Zhou; Qian Chen; Zean Tian; Tinghong Gao	2025	Materials & Design	10.1016/j.matdes.2025.113676	CoCrFeMnNi/graphene composite		low temperature	FCC + local BCC atomic clusters	molecular dynamics simulation	strengthening and hardening mechanism	yield strength ↑57.5%, elastic modulus ↑19%	FCC-BCC transition and graphene interface promote strengthening	Graphene hinders dislocation and improves hardening via stress transfer and phase interaction.
Mechanical properties of CoCrFeMnNi high entropy alloy lattice structures formed by selective laser melting☆	The special structure of the lattice structure makes it have many excellent properties. In this study, CoCrFeMnNi high-entropy alloy lattice structures with different density were prepared by selective laser melting (SLM). Their mechanical behaviors were investigated via quasi-static compression test and finite element modeling (FEM). The result shows that the double inverse diamond (DID) lattice…	Yangwei Du; Ketai He; Rong Guo; Zhipeng Zhou; Guoxuan Ming; Qi Liu; Hao Dong	2025	Materials & Design	10.1016/j.matdes.2025.113777	CoCrFeMnNi		SLM fabricated DID lattice, 15mm cube, 25% density		quasi-static compression + FEM	lattice strength and energy absorption	Yield strength 66 MPa, Young's modulus 3798 MPa	DID lattice with varying rod diameters for improved performance	SLM-formed DID lattice enhances HEA strength and energy absorption.
Excellent strength/ductility synergy by optimization of post-weld heat treatment for gas metal arc welded CoCrFeMnNi high entropy alloys with 410 stainless filler wire	Post-weld annealing is a promising method for enhancing the performance of welded joints. In this study, the influence of different post-weld annealing temperatures on the microstructure and mechanical properties of GMAW-welded CoCrFeMnNi high-entropy alloys with 410 stainless filler was investigated. Advanced characterization techniques such as SXRD, EBSD, and digital image correlation (DIC) wer…	Jiajia Shen; Rae Eon Kim; Jingjing He; Jin Yang; J.G. Lopes; Zhi Zeng; N. Schell; Hyoung Seop Kim; J.P. Oliveira	2025	Materials & Design	10.1016/j.matdes.2024.113556	CoCrFeMnNi + 410 stainless filler		post-weld annealing, various temperatures		high-throughput simulation + EBSD + SXRD + DIC	effect of optimized annealing on weld properties	elongation ↑ to 43.1%, strength unchanged	combined modeling and validation for welding optimization	Optimized annealing balances strength and ductility for HEA welded joints.
Analysis of the microstructure and corrosion behavior of FeCoNiCrMnAlx high-entropy alloy coatings	To study the corrosion behavior of high-entropy alloy coatings in alkaline solutions, FeCoNiCrMnAl₀.₅ and FeCoNiCrMnAl₁.₀ powders were prepared by mechanical alloying, and their coatings were coated on the surface of 316L stainless steel by plasma spraying technology. The corrosion resistance of the coatings in 1.0 mol/L NaOH solution was tested using an electrochemical workstation. The FeCoNiCrM…	Dongyao Zhang, Yun Tian, Xingye Mao, Yuxin Wang, Yanqi Zhao, Chunli Qiu, Keping Geng, Yanchun Dong, Yong Yang, Hongjian Zhao	2025	Intermetallics	10.1016/j.intermet.2025.108652	FeCoNiCrMnAlₓ	Al content variation (x=0.5, 1.0)	1.0 mol/L NaOH solution	FCC, BCC, Al₂O₃	Electrochemical workstation (potentiodynamic polarization, EIS)	microstructure, corrosion behavior in alkaline solutions	corrosion current density, corrosion potential, corrosion rate	Null	The corrosion rates were 0.529 mg/(cm²/h) and 0.671 mg/(cm²/h), respectively, both lower than the corrosion rate of 316L stainless steel of 0.878 mg/(cm²/h).
Enhanced mechanical properties of NiCoCrCuAl high entropy alloys with dual-phase microstructure	The correspondence between the mechanical properties and the microstructure of NiCoCrCuAl series high-entropy alloys (HEAs) was investigated by the adjustment of face-centered cubic (FCC) and body-centered cubic (BCC) phase proportions. The results show that the NiCoCrCuAl HEAs changed from FCC to BCC phase, with the volume fraction of body-centered cubic (BCC) phase increasing from 14 % to 93 %.…	Fa-Chang Zhao and Xing-Ming Zhao and Rong-Da Zhao and Fu-Fa Wu and Shun-Hua Chen	2025	Intermetallics	10.1016/j.intermet.2024.108627	NiCoCrCuAl	FCC/BCC dual-phase	Null	FCC, BCC	Microstructure analysis, mechanical testing	mechanical properties, phase composition	hardness, ultimate tensile strength	Null	The hardness of 518 Hv and the ultimate tensile strength of 1092 MPa were achieved in the NiCoCrCuAl series HEAs.
Effect of Si on the corrosion resistance of AlZrNbTi lightweight refractory high-entropy alloys in acidic environment	This study investigated the effect of Si content on the corrosion behavior of AlZrNbTiSix (x=0, 0.3, 0.6, 1.0 at%) lightweight refractory high-entropy alloys in a 1 M HNO3 solution. The results showed a transformation in the microstructures of AlZrNbTiSix from a single BCC phase (x=0) to a BCC matrix phase with Zr5Al3 hexagonal precipitated phases (x=0.3, 0.6, 1.0). AlZrNbTiSi0.6 exhibited the be…	Yue Chang; Hongxu Cheng; Xianzhe Jin; Zejun Li; Qiancheng Zhao; Xuefei Wang; Hong Luo	2024	Corrosion Science	10.1016/j.corsci.2024.112377	AlZrNbTiSi	AlZrNbTiSix (x=0, 0.3, 0.6, 1.0 at%)	in a 1 M HNO3	BCC	Null	corrosion resistance	Null	the addition of Si	Microgalvanic corrosion affected the formation of the oxide film, triggering an excessive amount of Si worsening the stability of the passive film.
Enhanced hot corrosion resistance of AlCoCrFeNi2.1 high entropy alloy coatings by extreme high-speed laser cladding	Extreme high-speed laser cladding (EHLC) and multiple laser remelting (EHLC-MR) are used to improve hot corrosion resistance of AlCoCrFeNi2.1 eutectic high-entropy alloy (EHEA) coatings by refining their microstructures, introducing low angle grain boundaries (LAGBs) and high densities of dislocations as well as higher compressive residual stresses (CRSs) in the coatings. The experimental results…	Li Zhang; Yan Ji; Yunxin Wang; Bin Yang	2024	Corrosion Science	10.1016/j.corsci.2024.112486	AlCoCrFeNi2.1	Null	a molten salt of 75 % Na2SO4 + 25 % NaCl at 900℃	Null	EHLC,EHLC-MR,EHEA,LAGBs,CRSs	hot corrosion resistance	Null	Extreme high-speed laser cladding (EHLC) and multiple laser remelting (EHLC-MR) are used to improve hot corrosion resistance of AlCoCrFeNi2.1 eutectic high-entropy alloy (EHEA) coatings by refining their microstructures, introducing low angle grain boundaries (LAGBs) and high densities of dislocations as well as higher compressive residual stresses (CRSs) in the coatings.	Thus the hot corrosion resistance of the EHEA coatings under a molten salt of 75 % Na2SO4 + 25 % NaCl at 900°C is improved significantly.
Influence of grain sizes and secondary phases on the mechanical behavior and corrosion resistance in a non-equiatomic NiCrCoFeMoAlTi high-entropy alloy	Single-phase face-center cubic (FCC) structured Ni27.7Cr24Co23.5Fe15.7Mo1.6Al3Ti4.5 high-entropy alloy (HEA) samples with different grain sizes were first achieved, suggesting smaller grain size improved corrosion resistance and strength. Subsequently, aging was performed on the sample with the smallest grain size (∼9.5 μm), leading to the formation of lots of nano-sized spherical coherent L12 pr…	Xiaohui Qin; Shiyu Liu; Jiaqi Duan; Weiping Chen; Zhiqiang Fu	2024	Corrosion Science	10.1016/j.corsci.2024.112452	Ni27.7Cr24Co23.5Fe15.7Mo1.6Al3Ti4.5	Null	Null	FCC	Null	corrosion resistance and strength	Null	with different grain sizes,aging was performed on the sample with the smallest grain size	smaller grain size improved corrosion resistance and strength.a superior combination of mechanical and corrosion properties was achieved. Secondary phases caused chemical and structural changes in the passive film due to galvanized corrosion, leading to slightly lower corrosion resistance.
Temperature dependence of corrosion behavior of a dual-phase Fe50Mn30Co10Cr10 high entropy alloy in supercritical water at 380-650 ℃	Corrosion behavior of a dual-phase Fe50Mn30Co10Cr10 HEA subjected to supercritical water at different temperatures was investigated. Both weight gain and oxide film thickness increased with increasing temperatures. An outer layer with polyhedral MnFe2O4 particles and an inner layer containing a mixture of CrMn1.5O4 and Fe3O4 were formed at 380℃. Mn2O3 outer and CrMn1.5O4 inner layers developed at…	Shanliang Zhou; Qi Zhao; Yuxuan Xia; Yuan Ren; Huiwang Huang; Xi Huang; Jie Qiu; Pengcheng Zhu; Xiaoyan Li; Yujun Xie	2024	Corrosion Science	10.1016/j.corsci.2024.112446	Fe50Mn30Co10Cr10	Null	supercritical water at different temperatures	a dual-phase	change temperature	Both weight gain and oxide film thickness increased	Null	subjected to supercritical water at different temperatures was investigated.	Both weight gain and oxide film thickness increased with increasing temperatures,the corrosion mechanism at different temperatures was also discussed.
The corrosion behavior and passive film properties of the cast and annealed AlCoCrFeNi2.1 eutectic high-entropy alloy in sulfuric acid solution	The effect of microstructure on the corrosion behavior and film properties of strengthened AlCoCrFeNi2.1 eutectic high-entropy alloy (EHEA) was investigated. Annealing of the 80 % cold-rolled AlCoCrFeNi2.1 EHEA at 650–1200 ℃ effectively improved the stable passive region to 930 mV, and decreased the passive current density by 25 % to 3.5 μA/cm2 compared with the cast alloy in 0.1 M H2SO4 solution…	Yu Fu; Hong Luo; Xinren Chen; J. Manoj Prabhakar; Xuefei Wang; Hongxu Cheng; Cuiwei Du; Songqing Hu; Xiaogang Li	2024	Corrosion Science	10.1016/j.corsci.2024.112456	AlCoCrFeNi2.1	Null	0.1 M H2SO4 solution	FCC and B2 phases	Annealing	corrosion behavior and film properties	930 mV,3.5 μA/cm2	Null	The improved corrosion resistance of the annealed AlCoCrFeNi2.1 EHEA was attributed to the increasing oxides proportion and thickness of passive film and the reduced composition difference between FCC and B2 phases.
Unraveling microstructure evolution during isothermal annealing treatment in dual-phase FeNiCr0.8Al0.8 high entropy alloy and its effect on corrosion behavior	In this work, a systematic investigation of the evolution of dual-phase microstructure, corrosion behavior of FeNiCr0.8Al0.8 high entropy alloy after isothermal annealing was conducted and corrosion mechanisms related to microstructure evolution and Cl diffusion behavior in as-annealed dual-phase alloys were revealed. The dual-phase microstructure characteristics in the as-annealed alloy were stu…	Puchang Cui ; Tao Xia; Jiapeng Wang; Hongli Wang; Zhonghong Lai; Yong Liu; Nan Qu; Jingchuan Zhu	2024	Corrosion Science	10.1016/j.corsci.2024.112287	FeNiCr0.8Al0.8	Null	annealing treatment at 1200 ℃ for 100 h	dual-phase	combining experimental characterizations with firstprinciple calculation approaches	corrosion resistance	4.53 eV,1.98 eV	combining experimental characterizations with firstprinciple calculation approaches,further interprets the mechanism of improved anti-corrosion behavior in the current as-annealed alloy.	The KPFM results and the first-principle calculations proved that the presence of BCC2 phase with a lower work function of 4.53 eV accelerates the occurrence of localized selective corrosion.The diffusion barrier of Cl in the BCC2 phase with lower value of 1.98 eV further interprets the mechanism of improved anti-corrosion behavior in the current as-annealed alloy.
A one-step fabrication of soft-magnetic high entropy alloy fiber with excellent strength and flexibility	Soft-magnetic fibers (SMFs) play a crucial role in energy conversion, transmission, and storage within electronic devices. However, conventional SMFs have poor plasticity and are therefore difficult to withstand long-term tensile, torsional, and shear deformation. A high fraction of grain boundaries could improve plastic deformability of conventional SMFs, but deteriorates the coercivity. This se…	Yan Ma; Zongde Kou; Weiming Yang; Aina He; Yaqiang Dong; Qikui Man; Haishun Liu; Zhiming Li; Akihisa Inoue; Jiawei Li	2024	Nature Communications	10.1038/s41467-024-54984-7	Fe34Co29Ni29Al3Ta3Si2	Null	Null	Null	a simple one-step in-rotating-water spinning method	reduce domain wall pinning and improve dislocation mobility.	a tensile strength of 674 MPa at 23% elongation,a low coercivity of 8.1 Oe, a moderate magnetization of 116 emu/g at 10 kOe and a high Curie temperature of 770 K	improve plastic deformability of conventional SMFs and coercivity	propose a strategy to overcome this dilemma, which is realized by coarsening the grains of a Fe34Co29Ni29Al3Ta3Si2 high entropy alloy (HEA) fiber containing ordered coherent nanoprecipitates with small lattice misfit via a simple one-step in-rotating-water spinning method.
Accelerating ab initio melting property calculations with machine learning: application to the high entropy alloy TaVCrW	Melting properties are critical for designing novel materials, especially for discovering high-performance, high-melting refractory materials. Experimental measurements of these properties are extremely challenging due to their high melting temperatures. Complementary theoretical predictions are, therefore, indispensable. One of the most accurate approaches for this purpose is the ab initio free-…	Li-Fang Zhu; Fritz Körmann; Qing Chen; Malin Selleby; Jörg Neugebauer; Blazej Grabowski	2024	npj Computational Materials	10.1038/s41524-024-01464-7	TaVCrW	Null	Null	Null	complementary theoretical predictions	Null	Null	The method achieves overall savings of computational resources by 80% compared to current alternatives.	propose a highly efficient DFT-based method aided by a specially designed machine learning potential.
Structure, short-range order, and phase stability of the AlxCrFeCoNi high-entropy alloy: insights from a perturbative, DFT-based analysis	We study the phase behaviour of the AlxCrFeCoNi high-entropy alloy. Our approach is based on a perturbative analysis of the internal energy of the paramagnetic solid solution as evaluated within the Korringa-Kohn-Rostoker formulation of density functional theory, using the coherent potential approximation to average over disorder. Via application of a Landau-type linear response theory, we infer …	Christopher D. Woodgate; George A. Marchant; Livia B. Pártay; Julie B. Staunton	2024	npj Computational Materials	10.1038/s41524-024-01445-w	AlxCrFeCoNi	Null	Null	FCC,BCC	based on a perturbative analysis of the internal energy of the paramagnetic solid solution as evaluated within the Korringa-Kohn-Rostoker formulation of density functional theory, using the coherent potential approximation to average over disorder.	Null	Null	Null	confirming that this ordered phase forms directly from the melt,For both fcc and bcc systems, chemical orderings are dominated by Al moving to one sublattice, Ni and Co the other, while Cr and Fe remain comparatively disordered. On the bcc lattice, our atomistic modelling suggests eventual decomposition into B2 NiAl and Cr-rich phases.
Data-driven design of novel lightweight refractory high-entropy alloys with superb hardness and corrosion resistance	Lightweight refractory high-entropy alloys (LW-RHEAs) hold significant potential in the fields of aviation, aerospace, and nuclear energy due to their low density, high strength, high hardness, and corrosion resistance. However, the enormous composition space has severely hindered the development of novel LW-RHEAs with excellent comprehensive performance. In this paper, an machine learning (ML)-b…	Tianchuang Gao; Jianbao Gao; Shenglan Yang; Lijun Zhang	2024	npj Computational Materials	10.1038/s41524-024-01457-6	Null	Null	in room temperature	bcc_A2 single-phase	an machine learning (ML)-based alloy design strategy	superb hard and corrosion resistance	6.5 g/cm3,593 HV,2.5 VSCE	an machine learning (ML)-based alloy design strategy	an machine learning (ML)-based alloy design strategy combined with a multi-objective optimization method was proposed and applied for a rational design of Al-Nb-Ti-V-Zr-Cr-Mo-Hf LW-RHEAs. The successful demonstration in this paper clearly demonstrates that the present design strategy driven by the ML technique should be generally applicable to other RHEA systems.
Influence of Cu and Co addition on metallurgical and wear characteristics of AlCrFeNi high entropy alloy	The creation of new alloys with improved qualities has become essential in modern industries for high-performance materials. This work’s main objective is to use vacuum arc melting (VAM) to synthesize two different high-entropy alloys (HEAs): AlCrFeNiCu and AlCrFeNiCo. The mechanical properties, phase composition, grain boundaries, and alloy composition of the HEAs were studied. The predominant c…	M. Vignesh; Sujit M.; Radhika N.; M. Sathishkumar; Muthu S. M.; Dash Khushbu; Mishra Soumya Ranjan	2024	Scientific Reports	10.1038/s41598-024-76350-9	AlCrFeNiCu,AlCrFeNiCo	Null	Null	BCC	VAM	Null	14.21% ,10 N, 0.5 m/s, and 500 m	the same can be predicted using regression analysis	his work’s main objective is to use vacuum arc melting (VAM) to synthesize two different high-entropy alloys (HEAs),The study categorizes the intricate worn surface structure by describing different surface properties and wear mechanisms, such as grooves, delamination, adhesive wear, and pitting.
A significant improvement in corrosion resistance and biocompatibility in ZrNbTiCrCu high-entropy films induced by the precipitation of Cu	Utilizing nanotechnology and composites to create a protective film on titanium alloy is an effective means of achieving the desired high performance. Self-assembly of nanocomposite structures offers a promising route to forming high entropy alloy films (HEAFs), but controlled preparation remains challenging. This work used magnetron sputtering through adjusting preparation parameters to prepare …	Xiaofei Ma ; Ping Ren; Shangzhou Zhang; Xiaochun He; Yang Li; Xuelei Yin; Huanyu Li; Shizeng Dang; Daliang Yu; Jianxun Qiu; Xin Zhou; Bing Zhou	2024	Journal of Materials Science & Technology	10.1016/j.jmst.2024.10.016	ZrNbTiCrCu	Null	Null	Null	magnetron sputtering	remarkable corrosion resistance performance,cytocompatibility experiment,antibacterial ability	Null	ZrNbTiCrCu HEAFs have remarkable corrosion resistance performance,excellent biocompatibility,and outstanding antibacterial ability	This work used magnetron sputtering through adjusting preparation parameters to prepare ZrNbTiCrCu HEAFs, achieving a significant improvement in corrosion resistance and biocompatibility induced by the precipitation of Cu.
Effect of oxygen on the microstructure, tensile properties and deformation behaviours of a biocompatible Ti40Zr25Nb25Ta10 high entropy alloy	The effect of oxygen on the microstructure, mechanical properties and deformation behaviours of as-cast biocompatible Ti40Zr25Nb25Ta10Ox (x = 0.5, 1.0 and 2.0 at.%) high entropy alloys (HEAs) was investigated. All three oxygen-doped HEAs solidified as a single body-centred cubic (BCC) phase grain structure with predominantly high-angle grain boundaries following the Mackenzie prediction. Increasi…	L. Mustafi; V.T. Nguyen; T. Song; Q. Deng; L. Jiang; X.B. Chen; D.M. Fabijanic; M. Qian	2024	Journal of Material Science & Technology	10.1016/j.jmst.2024.06.022	Ti40Zr25Nb25Ta10Ox	x = 0.5, 1.0 and 2.0 at.%	Null	Null	atom probe tomography	tensile strength,tensile ductility,corrosion resistance	947 ± 44 MPa,9.5 % ± 1.8 %,180 MPa/1.0 at.%,	Null	These properties make this HEA comparable to medical grade Ti-6Al-4V (wt.%) alloy (ASTM Grade 23 titanium) (σ0.2 ≥ 759 MPa; εf ≥ 10 %) in its ability to absorb energy in plastic deformation, while offering greater resistance to permanent shape changes,at this oxygen content(0.5at.%), the corrosion resistance of the Ti40Zr25Nb25Ta10O0.5 HEA in Hank’s solution is comparable to that of Ti-6Al-4V,and…
Mechanistic exploration of the exceptional corrosion resistance of the newly designed FeCoCrNiMoxNbx high-entropy alloys	Corrosion would lead to the failure of materials during service, causing huge economic losses and catastrophic accidents, particularly in chemical industries. In this work, a series of novel high-entropy alloys (HEAs) (FeCoCrNiMoxNbx) with exceptional corrosion resistance were designed. The phase composition, corrosion resistance, and passive film properties were determined through micro-characte…	Jiaming Duan; Zhineng Jiang; Feng Huang; Xian Zhang; Guoan Zhang	2024	Journal of Materials Science & Technology	10.1016/j.jmst.2024.10.001	FeCoCrNiMoxNbx	Null	Null	FCC,Laves	micro-characterization and electrochemical tests,first-principles calculation,	corrosion resistance,passive film properties	Null	unveil the corrosion resistance mechanism at the atomic level, especially the influence of elements on the corrosion resistance	It is found that the appropriate increase in the contents of Mo/Nb elements leads to the increased Laves phase in the HEAs and enhances the corrosion resistance of the HEAs. However, the excessive addition of Mo/Nb elements will cause more severe microgalvanic corrosion between FCC and Laves phases, resulting in a decrease in corrosion resistance, the presences of Mo, Nb, and Cr elements in the H…
Effect of carbon addition on the microstructure and corrosion resistance of the CoCrFeNi high-entropy alloy	Interstitial atom doping can enhance mechanical properties and phase structure, but its impact on corrosion resistance is not well-researched. This study investigated the influence of carbon-doping on the microstructure and corrosion resistance of CoCrFeNi high-entropy alloys. The results show that alloy doped with a moderate carbon content (C0.3 alloy) have the best corrosion resistance in 3.5 w…	Xueming Wei; Lijun Zhang; Fengyi Zhang; Chunzhi Zhang; Qixiang Jia; Kai Sun; Dongtao Duan; Hui Jiang; Gong Li	2024	Corrosion Science	10.1016/j.corsci.2024.111965	CoCrFeNi	carbon-doping	3.5 wt% NaCl solution	Null	Null	microstructure, corrosion resistance	stability, semiconductive property, composition	Null	The results show that alloy doped with a moderate carbon content (C0.3 alloy) have the best corrosion resistance in 3.5 wt% NaCl solution, while alloys with carbides (M7C3) show poor corrosion resistance.
Corrosion behaviors and mechanism of AlxCrFeMnCu high-entropy alloys in a 3.5 wt% NaCl solution	18.This study investigated the corrosion behavior of as-cast AlxCrFeMnCu (x = 0, 0.5, 1.0, 1.5, 2.0) high-entropy alloys (HEAs) in a 3.5 wt% NaCl solution at room temperature. The results indicated that the corrosion resistance of the AlxCrFeMnCu HEAs decreased with increasing Al content. Intergranular corrosion was the primary corrosion type for CrFeMnCu and Al0.5CrFeMnCu HEAs, while Al1.0CrFeMn…	Li Feng and Yang Yang and Yanchun Zhao and Kai Ma and Junpeng Cui	2024	Corrosion Science	10.1016/j.corsci.2024.112087	AlxCrFeMnCu(x=0,0.5,1.0,1.5,2.0)	Varying Al content	3.5 wt.% NaCl Solution, Room temperature	BCC2 phase	the XPS fitting calculation	Corrosion behaviors and mechanism	Molar ratio of Al, Cr2O3 content, Al2O3 content	Null	The corrosion resistance of the AlxCrFeMnCu HEAs decreased with increasing Al content
Effect of Sn addition on microstructure, hardness and corrosion behavior of CoCrFeNiSnx high entropy alloys in chloride environment	19.The microstructure, hardness and corrosion behavior of CoCrFeNiSnx (x = 0, 0.1, 0.5 and 1.0) HEAs were investigated in this work. The increase of the Sn addition resulted in the improvement of hardness (reached 424.9 HV) which attributed to the increase of the Ni3Sn2 phase with higher hardness. Adding Sn with molar ratio of 0.1 promoted the pitting initiation due to the potential difference be…	Weiwei Chang and Xiyang Wang and Hongchang Qian and Xudong Chen and Yuntian Lou and Min Zhou and Dawei Guo and Chi Tat Kwok and Lap Mou Tam and Dawei Zhang	2024	Corrosion Science	10.1016/j.corsci.2023.111808	CoCrFeNiSnx	Sn addition	Chloride environment	Ni3Sn2 phase, FCC phase	Null	Effect of Sn addition on microstructure, hardness and corrosion behavior	hardness(reached 424.9HV), potential	Sn addition	The increase of Sn addition resulted in the improvement of hardness
Corrosion and passivation of AlCrFe2Ni2Mox high-entropy alloys in sulphuric acid	21.Corrosion behaviour of AlCrFe2Ni2Mox (x = 0.0, 0.1, 0.15, 0.3 and 0.6) high-entropy alloys was investigated in a 0.1 M H2SO4 solution. Passive films formed upon anodic polarisation, built of Al-based inner layer and (Cr, Fe, Mo)-based outer layer, had good protective properties. In particular, they prevented corrosion of the (Al, Ni)-rich BCC-B2 phase, which was observed under open-circuit con…	Jakub Czerski and Marzena Mitoraj-Królikowska and Elżbieta Godlewska and Annica Wetzel and Julia Witt and Ozlem Ozcan and Mateusz Marzec and Marcin Goły	2024	Corrosion Science	10.1016/j.corsci.2024.111855	AlCrFe2Ni2Mox(x=0.0,0.1,0.15,0.3,0.6)	Null	0.1 M H2SO4 solution	BCC-B2 phase	Null	Corrosion and passivation	Null	Mo concentrations	Moderate amounts of Mo, up to x = 0.3, positively affected the passivation ability of AlCrFe2Ni2. Signiffcant changes in microstructure and phase composition of the alloy at higher Mo concentrations i(x = 0.6) resulted in deterioration of its corrosion resistance
Effect of grain size on the corrosion resistance of the Fe41Mn25Ni24Co8Cr2 high entropy alloy	22.The annealing effect on the corrosion resistance of a non-equiatomic Fe41Mn25Ni24Co8Cr2 high entropy alloy after high-ratio differential speed rolling was examined. The corrosion resistance of the alloy improved as the grain size decreased within the grain-size range of 3.5 µm to 84.9 µm. Grain boundaries were identiffed as contributing factors to the enhanced corrosion resistance by acting as…	Ahmad Bahmani and Shabnam Moradi and Mehrab Lotfpour and Hee Tae Jeong and Woo Jin Kim	2024	Corrosion Science	10.1016/j.corsci.2024.111892	Fe41Mn25Ni24Co8Cr2	Null	Null	Null	high-ratio differential speed rolling	Corrosion resistance	Null	Null	The corrosion resistance of the alloy improved as the grain size decreased within the grain-size range of 3.5 µm to 84.9 µm.
Effect of aging on corrosion resistance of (FeCoNi)86Al7Ti7 high entropy alloys	The (FeCoNi)86Al7Ti7 high-entropy alloy (HEA) was fabricated using selective laser melting (SLM), followed by an aging procedure to produce precipitation. A series of electrochemical experiments revealed the aged HEA has better corrosion resistance than the as-printed specimen. The surface of the aged HEA was found to have a more stable and superior passive film. The Transmission Electron Microsc…	Yubo Wang and Gengchen Li and Han Li and Yongkun Mu and Kang Sun and Wenjun Zhao and {Da Li} and Yandong Jia and Gang Wang	2024	Corrosion Science	10.1016/j.corsci.2023.111717	(FeCoNi)86Al7Ti7	Null	Aging procedure	FCC, L12	Selective laser melting	Stable and superior passive film	Stable and superior passive film	Effect of aging	A series of electrochemical experiments revealed the aged HEA has better corrosion resistance than the as-printed specimen.
Microstructure and corrosion resistance properties of (FeCoNi)86Al7Ti7 high-entropy alloy via different aging time	30.The effects of heat treatment processes with different aging times on the corrosion behavior and passive film properties of the (FeCoNi)86Al7Ti7 high-entropy alloy were investigated. The study shows that aging time has a signiffcant effect on the grain characteristics and L21 phase distribution. A suitable aging time optimizes the compositional segregation between the face-centered cubic and L…	Hongxu Cheng and Hong Luo and Xuefei Wang and Xiaogang Li	2024	Corrosion Science	10.1016/j.corsci.2023.111670	(FeCoNi)86Al7Ti7	Null	different aging time	face-centered cubic, L21 phases	heat treatment processes	Microstructure and corrosion resistance properties	grain characteristics, L21 phase distribution	Null	Samples aged for 1 h exhibit the best corrosion resistance
The influence of microstructural evolutions on electrochemical corrosion and passive behavior in precipitation-strengthened high-entropy alloys	33.Effects of microstructural evolutions on electrochemical corrosion properties and passive film characteristics of precipitation-strengthened (Ni2Co2FeCr)92Al4Nb4 high-entropy alloys (HEAs) were investigated in a saline environment. Compared with single-phase FCC alloys, the appearance of nano-sized L12 particles increases the metastable pitting activities and slightly reduces the pitting poten…	Zhang, J. Y. ; Zhou, Y. H. ; Ren, Z. Q. ; Luan, J. H. ; Zhao, Y. L. ; Yang, T.	2024	Corrosion Science	10.1016/j.corsci.2024.112074	(Ni2Co2FeCr)92Al4Nb4	Null	saline environment	FCC, L12	Null	electrochemical corrosion and passive behavior	pitting activities, pitting potential	Null	The corrosion morphologies of the single-phase and L12- strengthened alloys are dominated by pitting, whereas the intergranular corrosion (IGC) and intragranular dealloying-like corrosion occur in the D019-strengthened alloy.
Effect of seawater temperature on the corrosion and cavitation erosion-corrosion resistance of Al10Cr28Co28Ni34 high-entropy alloy coating	36.The influence of temperature on the corrosion and cavitation erosion-corrosion (CE-C) behavior of Al10Cr28Co28Ni34 high-entropy alloy (HEA) coating in seawater was investigated. Interestingly, the corrosion resistance of the coating progressively diminished with an increase in seawater temperature, but the CE-C resistance demonstrated a trend of initial increase followed by a decrease. At high…	Haobo Cao and Guoliang Hou and Tongchao Xu and Junkai Ma and Hongqi Wan and Yulong An and Huidi Zhou and Jianmin Chen	2024	Corrosion Science	10.1016/j.corsci.2024.111822	Al10Cr28Co28Ni34	Null	seawater temperature	Null	Null	corrosion, cavitation erosion-corrosion resistance	oxide film thickness, maximum bubble size, collapse time	Null	Interestingly, the corrosion resistance of the coating progressively diminished with an increase in seawater temperature, but the CE-C resistance demonstrated a trend of initial increase followed by a decrease.
Mechanistic understanding of speciated oxide growth in high entropy alloys	37.Complex multi-element alloys are gaining prominence for structural applications, supplementing steels, and superalloys. Understanding the impact of each element on alloy surfaces due to oxidation is vital in maintaining material integrity. This study investigates oxidation mechanisms in these alloys using a model five-element equiatomic CoCrFeNiMn alloy, in a controlled oxygen environment. The…	Bharat Gwalani, Andrew Martin, Elizabeth Kautz, Boyu Guo, S. V. Lambeets, Matthew Olszta, Anil Krishna Battu, Aniruddha Malakar, Feipeng Yang, Jinghua Guo, Suntharampillai Thevuthasan, Ruipeng Li, Aram Amassian, Martin Thuo & Arun Devaraj	2024	Nature Communications	10.1038/s41467-024-49243-8	CoCrFeNiMn	Null	controlled oxygen environment	Null	n-situ atom probe tomography, transmission electron microscopy,X-ray absorption near-edge structure techniques	oxidation process and surface oxide structure evolution	Null	Null	Our findings deconvolute the mechanism for compositional and structural changes in the oxide film and will pave the way for a predictive design of complex alloys with improved resistance to oxidation under extreme conditions.
Investigation of surface hardness, thermostability, tribo-corrosion, and microstructural morphological properties of microwave-synthesized high entropy alloy FeCoNiMnCu coating claddings on steel	45.Deposition of high entropy alloy FeCoNiMnCu on SS-304 was carried out by microwave energy for application in “solid oxide fuel-cell (SOFC) interconnects”. The ball-milling has been performed by taking “Fe, Co, Ni, Mn, and Cu” in equal 20 wt. % of before deposited on SS-304 substrate. The deposited steel with 20% Fe 20% Co 20% Ni 20% Mn 20% Cu high entropy alloy (HEA) was exposed to thermal-exp…	Shubham Sharma, Shashi Prakash Dwivedi, Kahtan A. Mohammed, Abhinav Kumar, Fuad A. Awwad, M. Ijaz Khan	2024	Scientific Reports	10.1038/s41598-024-55331-y	FeCoNiMnCu	20% Fe 20% Co 20% Ni 20% Mn 20% Cu	in the air for up to ten weeks at 800 °C	harder-phases	microwave-synthesized	surface hardness, thermostability, tribo-corrosion, and microstructural morphological properties	Null	Null	Results have indicated that after the thermal exposure of deposited steel with 20% Fe 20% Co 20% Ni 20% Mn 20% Cu in the air for up to ten weeks at 800 °C, a “protective Cr2O3 layer”, and “high-entropy spinel coating” of (Fe, Co, Ni, Mn, Cu)3O4 have been formed.
Investigation on improving the comprehensive performance of environmental barrier coating materials by high-entropy multiphase design	It is difficult to obtain a single-phase environmental barrier coating material that simultaneously offers the advantages of low thermal conductivity, a suitable coefficient of thermal expansion, and excellent corrosion resistance. Herein, to synthesize the advantages of single-phase materials, we have developed an effective approach for the design of high-entropy multiphase ceramics of rare eart…	Zeyu Chen; Yongzhe Wang; Yiling Huang; Fan Peng; Chucheng Lin; Wei Zheng; Xuemei Song; Yaran Niu; Yi Zeng	2024	npj Materials Degradation	10.1038/s41529-024-00455-9	high-entropy RE2SiO5/RE2O3 and RE2SiO5/RE2Si2O7 multiphase ceramics	RE2SiO5/RE2O3 and RE2SiO5/RE2Si2O7 (RE = Lu, Yb, Tm, Er, Ho, and Y)	Null	multiphase	Null	low thermal conductivity, a suitable coefficient of thermal expansion, and excellent corrosion resistance	Null	design of high-entropy multiphase ceramics combining single-phase materials' advantages	The design approach enables the development of high-entropy RE2SiO5/RE2O3 and RE2SiO5/RE2Si2O7 multiphase ceramics as potential environmental barrier coatings for Al2O3f/Al2O3 and SiCf/SiC composites.
A Novel Cu and Ag Bearing High-Entropy Alloy With Remarkable Antibacterial, Antiviral and Anti-Microbial Corrosion Performances	The development of antibacterial and antiviral high-entropy alloys (HEAs) incorporating copper has attracted widespread attention. However, the segregation of Cu in HEAs can result in detrimental effects on their mechanical properties and corrosion resistance. Herein, two novel HEAs, CoCrCu0.3FeNi-Ag(1.8 wt.%) (Cu-AgHEA) and CoCrFeNi-Ag0.6 (AgHEA), are designed to address these concerns. The yiel…	Enze Zhou; Yi Yang; Guangyu Ren; Lingke Li; Zhong Li; Tingyue Gu; Fuhui Wang; Dake Xu	2024	Advanced Functional Materials	10.1002/adfm.202419467	CoCrCu0.3FeNi-Ag(1.8 wt.%) (Cu-AgHEA) and CoCrFeNi-Ag0.6 (AgHEA)	CoCrCu0.3FeNi-Ag(1.8 wt.%) and CoCrFeNi-Ag0.6	Null	Null	Null	mechanical properties, abiotic corrosion resistance, antibacterial efficacy, antiviral characteristics	yield strength (~400 MPa), antibacterial efficacy (99.9%), antiviral deactivation (~99% SARS-CoV-2)	design of Cu-AgHEA and AgHEA to mitigate Cu segregation and integrate antibacterial/antiviral functions	Cu-AgHEA exhibits enhanced mechanical strength, corrosion resistance (1 order of magnitude improvement over CuHEA), 99.9% antibacterial efficacy, and ~99% SARS-CoV-2 deactivation due to synergistic Cu/Ag ion release and ROS generation.
A novel lightweight refractory high-entropy alloy	A novel equiatomic refractory AlNbTiVY high-entropy alloy containing rare earth elements was fabricated by vacuum arc melting. AlNbTiVY alloy possesses a dual-phase structure, consisting of a B2 ordered matrix and an Orthorhombic structured Y2Al second phase. The alloy has a dendritic microstructure with a density of only 5.18 g/cm3. As the testing temperature increases, the compressive yield str…	Wentao Jiang; Tiantian Wang; Xiaohong Wang; Bo Jiang; Ye Wang; Xin Wang; Hongyu Xu; Maoliang Hu; Dongdong Zhu	2024	Journal of Materials Research and Technology	10.1016/j.jmrt.2024.11.247	AlNbTiVY	Equiatomic AlNbTiVY with rare earth Y addition	High-temperature compression (RT to 800°C)	B2 ordered matrix + Orthorhombic Y₂Al second phase	Vacuum arc melting, compression testing, microstructure analysis (SEM/EDS)	microstructure characterization, high-temperature mechanical properties, thermal stability modeling	Density (5.18 g/cm³), compressive yield strength (1104 MPa at RT, 321 MPa at 800°C), theoretical application temperature (>600°C)	Rare earth Y-induced dual-phase (B2/Y₂Al) design for lightweight and high-temperature stability	AlNbTiVY exhibits dual-phase synergy (B2 matrix + Y₂Al phase) with ultralow density (5.18 g/cm³) and retained deformability at 800°C (321 MPa yield strength). Theoretical modeling predicts applicability above 600°C, enabled by Y₂Al phase thermal stabilization.
Antiferromagnetism and Phase Stability of CrMnFeCoNi High-Entropy Alloy	It has long been suspected that magnetism could play a vital role in the phase stability of multicomponent high-entropy alloys. However, the nature of the magnetic order, if any, has remained elusive.Here, by using elastic and inelastic neutron scattering, we demonstrate evidence of antiferromagnetic order below ∼80 K and strong spin fluctuations persisting to room temperature in a single-phase f…	Li Zhu; Haiyan He; Muhammad Naeem; Xun Sun; Ji Qi; Peng Liu; Stefanus Harjo; Kenji Nakajima; Bing Li; Xun-Li Wang	2024	Physical Review Letters	10.1103/PhysRevLett.133.126701	CrMnFeCoNi	Single-phase CrMnFeCoNi high-entropy alloy	Null	Face-centered cubic (fcc)	Elastic/inelastic neutron scattering, first-principles calculations	magnetic order (antiferromagnetic), spin fluctuations, fcc phase stabilization mechanism	Null	Discovery of γ-Mn-like antiferromagnetic order and spin fluctuations stabilizing fcc phase in HEA	Antiferromagnetic order below ~80 K and persistent spin fluctuations up to room temperature stabilize the fcc phase in CrMnFeCoNi. The γ-Mn-like magnetic structure (magnetic moments in alternating (001) planes along ⟨111⟩) highlights magnetism’s critical role in HEA phase stability.
Characterization of FeCoNiCr high-entropy alloys manufactured by powder metallurgy technique	This study explores the phase constitution, thermal behavior, magnetic characteristics, and mechanical properties of FeCoNiCrCux high-entropy alloys (HEAs) produced via powder metallurgy, focusing on varying copper ratios (0–20%). The investigation seeks to understand how the introduction of copper influences the phase composition and properties of FeCoNiCr HEAs, particularly regarding changes in…	Ali Basem; Mohamed Ali Hassan; Omayma A. Elkady; Y.A. El-Shekeil; Samir Bendoukha; Nabil Barhoumi; H.A. Refaey; Ammar Elsheikh	2024	Journal of Materials Research and Technology	10.1016/j.jmrt.2024.03.054	FeCoNiCrCu	FeCoNiCrCuₓ (x=0–20 at%)	Null	FCC → FCC + FCC (Cu-rich) dual-phase with increasing Cu conten	Powder metallurgy, SEM/XRD, DSC (thermal analysis), VSM (magnetic testing), hardness testing	phase evolution, thermal expansion, magnetic properties, Cu addition effect on hardness	Hardness reduction with Cu content, thermal expansion behavior, magnetic parameters	Systematic study of Cu-induced FCC→FCC(Cu-rich) dual-phase transition and multi-property trade-offs	Cu addition (up to 20%) induces FCC+Cu-rich FCC dual-phase formation, reducing hardness but enabling tunable thermal/magnetic properties. This highlights Cu’s role in balancing phase stability and functional/mechanical performance for HEA design.
Chemical compatibility of high entropy alloys with liquid PbLi	The chemical compatibility and corrosion resistance of three different high entropy alloys of CrFeV-X, where X =CuW, CuMo, TaW, to stagnant eutectic PbLi was studied. Three nominal HEAs compositions, Cr35Fe35V20W5Ta5 (H-TaW), Cu5Cr35Fe35V20W5 (H-CuW) and Cu5Cr35Fe35V20Mo5 (H-CuMo) were prepared by vacuum arc melting under a low pressure He atmosphere using a non-consumable W electrode and startin…	T. Hernandez ´ ; M.A Monge; F.J. Sanchez ´ ; A. Rodriguez-Lopez; Y. Ortega; L. Serrador; B. Savoini	2024	Nuclear Materials and Energy	10.1016/j.nme.2024.101606	CrFeV-X（X=TaW, CuW, CuMo）	Cr35Fe35V20W5Ta5 (H-TaW), Cu5Cr35Fe35V20W5 (H-CuW), Cu5Cr35Fe35V20Mo5 (H-CuMo)	stagnant eutectic PbLi (14.9% Li) at 550°C for 168–1344 h	Null	Vacuum arc melting, SEM/EDX, EBSD, SIMS (Li diffusion analysis)	chemical compatibility, PbLi corrosion resistance, Li diffusion kinetics, microstructure-corrosion correlation	Li diffusion coefficients, corrosion rate differences linked to W/Mo/Ta content	Systematic comparison of W/Mo/Ta alloying effects on PbLi corrosion resistance in HEAs	W significantly degrades corrosion resistance in PbLi, while Cu/Mo/Ta influence Li diffusion and microstructural stability. H-CuMo and H-TaW exhibit better corrosion performance than H-CuW, highlighting compositional tailoring for PbLi-compatible HEAs.
Creep in a nanocrystalline VNbMoTaW refractory high-entropy alloy	Refractory high-entropy alloys (RHEAs) are considered to be a promising candidate for elevated temperature applications. Nanocrystalline (NC) RHEAs are supposed to exhibit many different high-temperature mechanical behaviors in comparison with their coarse-grained (CG) and ultrafine-grained (UFG) counterparts. However, the creep behaviors of NC RHEAs, which must be well evaluated for high-tempera…	Xun Shen; Baoru Sun; Shengwei Xin; Shuaijun Ding; Tongde Shen	2024	Journal of Materials Science & Technology	10.1016/j.jmst.2023.11.019	VNbMoTaW	Equiatomic VNbMoTaW refractory high-entropy alloy (RHEA)	High-temperature compression creep tests (973 K and 1073 K) under 70–1100 MPa stress	Null	Mechanical alloying (MA), high-pressure/high-temperature sintering, creep deformation analysis (activation volume/stress exponent/activation energy)	creep behavior, grain boundary diffusion mechanism, elemental diffusion kinetics	Creep resistance comparison (NC vs CG/UFG HEAs), stress exponent, activation energy, Mo/Nb grain boundary diffusivity dominance	First study on nanocrystalline RHEA creep behavior; identification of Mo/Nb diffusion as rate-controlling mechanism	Bulk NC VNbMoTaW exhibits creep resistance dominated by Mo/Nb grain boundary diffusion (slowest diffusivities). Despite lower creep resistance than CG counterpart, it surpasses reported CG/UFG HEAs. This provides a design pathway for diffusion-controlled creep-resistant RHEAs.
Effect of heat treatment on AlCoCrFeNi2.1 eutectic high-entropy alloy after electron beam remelting	The impact of electron beam remelting and annealing on the microstructure, phase distribution and mechanical properties of AlCoCrFeNi2.1 eutectic high-entropy alloy was systematically investigated. The results show that the lamellar space decreased from 1240 nm to 310 nm after electron beam remelting, and the L12 precipitates and BCC precipitates phases disappeared in the FCC and B2 phases, respe…	Wenqin Wang; Xun Zhu; De Wang; Yulong Li; Shiqi Zhang; Ting Wang; Chaohua Zhang; Jie Chen; Shen Li	2024	Intermetallics	10.1016/j.intermet.2024.108363	AlCoCrFeNi2.1	Null	Null	FCC + B2 phases (initial); FCC + B2 + reformed FCC precipitates (after annealing)	Electron beam remelting, annealing, SEM, hardness/wear testing	microstructure refinement, phase evolution, hardness, wear resistance	Hardness (264 HV → 383.4 HV → 415 HV), wear resistance improvement (1.5x → 3.1x), lamellar spacing (1240 nm → 220 nm)	Electron beam remelting + annealing synergistically refine lamellar spacing and FCC precipitation	Combined electron beam remelting and annealing reduce lamellar spacing from 1240 nm to 220 nm, reform FCC precipitates in B2 phase, and enhance hardness (415 HV) and wear resistance (3.1x improvement). Microstructural refinement and FCC precipitation are key mechanisms.
Effect of Mo addition on microstructural evolution and corrosion behaviors of AlCrFeNi3 eutectic high-entropy alloy	The microstructural evolution and corrosion performance in chloride environments of as-cast AlCrFeNi3Mox (x =0, 0.1, 0.2, 0.3, and 0.4 in molar ratio) high-entropy alloys (HEAs) were investigated. Results indicated that the microstructures of AlCrFeNi3Mox HEAs were transferred from FCC+B2 dual-phase eutectic microstructures (x =0, 0.1, and 0.2) to bimodal eutectic microstructures (x = 0.3, 0.4), …	Jianming Wang; Hui Jiang; Wenlong Xie; Xiao Kong; Shengxue Qin; Hongwei Yao; Yong Li	2024	Corrosion Science	10.1016/j.corsci.2024.111879	AlCrFeNiMo	AlCrFeNi3Mox (x=0, 0.1, 0.2, 0.3, 0.4 molar ratio)	chloride environments	FCC + B2 dual-phase eutectic (x=0–0.2) → bimodal eutectic (x=0.3–0.4)	microstructural analysis (SEM/EDS), electrochemical corrosion tests	microstructural evolution, corrosion resistance, passive film composition, micro-galvanic corrosion behavior	Cr₂O₃/MoO₃ passive film enrichment, B2 phase dissolution priority, corrosion resistance comparison with 316L SS	Mo addition inducing bimodal eutectic structure and synergistic Cr₂O₃/MoO₃ passive film formation	AlCrFeNi3Mo0.3 exhibits optimal corrosion resistance due to dense Cr₂O₃/MoO₃ passive film. Mo-containing HEAs surpass Mo-free alloy and 316L SS, with B2 phase acting as anode in micro-galvanic corrosion. Phase transition (FCC+B2 → bimodal) correlates with enhanced corrosion performance.
Effect of strain rate and temperature on dynamic compressive behavior of HfBeTiZrCuNi high entropy bulk metallic glass	This study investigated the high-temperature dynamic mechanical properties of Hf-based high entropy bulk metallic glass (HE-BMG). Uniaxial dynamic compressive tests of Hf-based HE-BMG were conducted at elevated temperatures (from 298 to 800 K) under a high strain rate (from 1000 to 5000 s− 1) by a split Hopkinson pressure bar (SHPB) device with a high-temperature system, and the failed specimens …	Xiang Li; Yanhong Li; Ke Yang; Bing Li; Yangjing Cao; Bo Dang; Tao Xu; Senlin Li; Xinhui Fan	2024	Intermetallics	10.1016/j.intermet.2024.108360	Hf-based HE-BMG	Null	High strain rate (1000–5000 s⁻¹) at elevated temperatures (298–800 K)	Null	Split Hopkinson pressure bar (SHPB) dynamic compression, microstructure analysis, fracture mode characterization	high-temperature dynamic mechanical properties, strain rate/temperature sensitivity, fracture mode transitions, crystallization-induced embrittlement	Maximum compressive stress, total strain, fracture mode types, crystallization temperature threshold	Investigation of Hf-based HE-BMG under coupled high-temperature/high-strain-rate conditions; linkage between crystallization and fracture mode transitions	Maximum stress and strain decrease with rising strain rate/temperature. Fracture modes transition with strain rate and temperature, driven by adiabatic heating and crystallization-induced embrittlement. Crystallization above critical temperature (>Tg) accelerates brittle failure.
Enhancing corrosion resistance in CoCrFeNiTa high entropy alloys via Mo addition	In this work, the microstructural characteristics and corrosion resistance of Co1.5CrFeNi1.5Ta0.1Mox (x = 0, 0.1, 0.3, 0.5) high entropy alloys (HEAs) fabricated by vacuum arc melting were investigated. To assess the comprehensive corrosion resistance of these alloys in seawater, alkaline or acid rain harsh environments, their electrochemical properties were investigated in solutions of 3.5 wt.% …	Kang Wang; Yuan Zhu; Peng-wei Wang; Xin Li; Babafemi Malomo; Liang Yang	2024	Electrochimica Acta	10.1016/j.electacta.2024.143951	CoCrFeNiTaMo	Co₁.₅CrFeNi₁.₅Ta₀.₁Moₓ (x=0, 0.1, 0.3, 0.5)	3.5 wt.% NaCl, 1 M NaOH, 0.5 M H₂SO₄ solutions at room temperature	FCC (x=0–0.1) → FCC + σ phase (Cr/Mo-rich) and Ta/Mo-rich intercellular phases (x=0.3–0.5)	Vacuum arc melting, potentiodynamic polarization, SEM/EDS microstructure analysis	corrosion behavior in multi-environment (neutral/alkaline/acid), passive film stability, σ phase influence on localized corrosion	Passive film stability (MoO₄²⁻ in NaOH, Cr₂O₃/MoO₃ in NaCl), corrosion resistance ranking (Mo0.3 > Mo0.1 > Mo0.5), σ phase-induced degradation in H₂SO₄	Mo addition optimizes passive film composition (Cr/Mo oxides) and suppresses σ phase formation in NaCl/NaOH, but exacerbates intercellular corrosion in H₂SO₄; multi-environment corrosion performance balancing	Mo0.3 alloy exhibits superior corrosion resistance in NaCl (dense passive film) and NaOH (MoO₄²⁻ protection), while Mo0.5 degrades in H₂SO₄ due to σ phase-induced localized corrosion. Mo additions enhance NaCl/NaOH resistance but require controlled σ phase formation. Optimal Mo content (0.3) balances multi-environment performance for structural HEA design.
Exceptional combinations of tensile properties and corrosion resistance in a single-phase Ti1.6ZrNbMo0.35 refractory high-entropy alloy	In this study, we introduce a novel single-phase Ti1⋅6ZrNbMo0.35 refractory high-entropy alloy (RHEA), synthesized through vacuum arc-melting. The as-cast RHEA demonstrates excellent mechanical properties with a high yield strength of ~930 MPa and a large tensile strain of ~15.4 %, achieved through severe lattice distortion. Moreover, our investigation reveals the superior corrosion resistance of…	Hao Wang; Weiping Chen; Shiyu Liu; Chenliang Chu; Liran Huang; Jiaqi Duan; Zhao Tian; Zhiqiang Fu	2024	Intermetallics	10.1016/j.intermet.2024.108349	TiZrNbMo	Ti₁.₆ZrNbMo₀.₃₅ refractory high-entropy alloy (RHEA) with single-phase structure	3.5 wt% NaCl solution	Single-phase structure	Vacuum arc-melting, tensile testing, electrochemical corrosion testing, passive film analysis (XPS/SEM)	mechanisms, passive film composition evolution	Yield strength (~930 MPa), tensile strain (~15.4%), Mo⁶⁺ oxide content in passive film	Severe lattice distortion enables strength-ductility balance; single-phase structure + Mo⁶⁺ oxide enrichment synergistically enhances corrosion resistance	Ti₁.₆ZrNbMo₀.₃₅ RHEA achieves exceptional strength (~930 MPa) and ductility (~15.4%) via lattice distortion. Its superior corrosion resistance in NaCl stems from single-phase homogeneity, Mo⁶⁺-enriched passive film, and continuous oxidation. This work pioneers RHEA design integrating mechanical and anti-corrosion performance.
Bidirectional phase transformation facilitated by ε-martensite bands interaction in metastable Fe50Mn30Co10Cr10 dual-phase high entropy alloys	The phase transformation-induced plasticity (TRIP) metastable Fe50Mn30Co10Cr10 dual-phase high entropy alloys exhibit an excellent combination of strength and ductility. The interaction between ε-martensite (HCP phase) bands plays a fundamental role in determining the mechanical properties of Fe50Mn30Cr10Co10 alloys. In this work, the phase transition mechanism of Fe50Mn30Co10Cr10 dual-phase high…	Yanxiang Liang; Li Zhang; Chunyan Bai; Jianfeng Zhao; Luobin Wang; Wei Guo; Jian Tu; Qiang Wan	2024	Materials Characterization	10.1016/j.matchar.2024.113655	FeMnCoCr	Fe₅₀Mn₃₀Co₁₀Cr₁₀ dual-phase high-entropy alloy (HEA	Null	FCC + ε-martensite (HCP) dual-phase	Electron backscatter diffraction (EBSD), transmission electron microscopy (TEM), molecular dynamics (MD) simulations	TRIP effect, ε-martensite band interactions, phase transition mechanisms (cross slip, dislocation dissociation)	Null	Mechanistic insights into ε-martensite band growth via Shockley partial dislocation dynamics; cross-structured ε-martensite bands inducing FCC grain formation	`ε-martensite band interactions govern phase transition：Cross-slip/dissociation of Shockley partials at band junctions drives ε-martensite growth.Edge-type partial dislocations at intersecting ε-bands form new FCC grains.Mixed-type partials promote ε-band expansion via dislocation glide. TRIP effect in dual-phase HEA enables strength-ductility synergy through controlled phase boundary dynamics.`
Forming high-strength and softening-resistant AlxHf0.5Mo0.5NbTa0.5TiVZr dual-phase refractory high-entropy alloys	Refractory high-entropy alloys AlxHf0.5Mo0.5NbTa0.5TiVZr with the addition of different amounts of low-density aluminum were developed to improve the strength and softening resistance at elevated temperatures. The microstructure and phase formation were investigated, and the mechanical properties and deformation behavior at various temperatures were studied. The primary dendrites consisted of bod…	Li-Siang Lin; Jen-Ho Wang; Ya-Jing Lee; Ping-Hsu Ko; Yu-Lin Chen; Shou-Yi Chang	2024	Intermetallics	10.1016/j.intermet.2024.108350	AlHfMoNbTaTiVZr	AlₓHf₀.₅Mo₀.₅NbTa₀.₅TiVZr (x varied; optimal at x=0.5	High-temperature compression (up to 600°C)	BCC (Mo/Nb/Ta-rich primary dendrites) + Al/Hf/V/Zr-rich interdendritic second phase (network-like)	Microstructural analysis (SEM/EDS), high-temperature compression testing, dislocation structure characterization (TEM)	phase evolution with Al content, high-temperature strength-softening resistance trade-off, dislocation-mediated deformation mechanisms	Yield strength (1240 MPa at 600°C), compressive strain (13%), dislocation density/configuration	Al-induced refinement of dendritic structure and second-phase networks; dislocation forest formation enhancing work hardening and softening resistance	The Al₀.₅Hf₀.₅Mo₀.₅NbTa₀.₅TiVZr alloy achieves optimal high-temperature performance with 1240 MPa strength and 13% compressive strain at 600°C. Moderate Al content refines dendritic BCC phases and interdendritic second-phase networks, promoting dislocation tangles for enhanced work hardening. Excessive Al causes brittle fracture via dislocation pileup at phase boundaries. This study demonstrates …
High stability and high corrosion resistance of a class of Co–Cr–Mo–Nb–B high-entropy metallic glasses	In this study, we have developed a class of new Co–Cr–Mo–Nb–B high-entropy metallic glass alloys with high stability and high corrosion resistance. It was found that for Co26Cr26Mo26Nb7B15 metallic glass, the glass transition temperature reached to 1058 K, and the initial crystallization temperature of Co24.5Cr26.5Mo26.5Nb7.5B15 metallic glass was as high as 1132 K. There is a large hardness of 1…	Yating Zhou; Tuo Wang	2024	Journal of Materials Research and Technology	10.1016/j.jmrt.2024.03.035	CoCrMoNbB	Co26Cr26Mo26Nb7B15, Co24.5Cr26.5Mo26.5Nb7.5B15, Co27.5Cr27.5Mo26.5Nb3.5B15	1 M hydrochloric acid solution	Metallic glass (amorphous)	Null	Development and characterization of high-entropy metallic glass alloys with high stability and corrosion resistance	Glass transition temperature (1058 K), crystallization temperature (1132 K), hardness (18.1 GPa), Young’s modulus (267 GPa), lower self-corrosion current density, higher self-corrosion voltage	Novel CoCrMoNbB high-entropy metallic glass design leveraging covalent and metal-metalloid bond hybridization	Enhanced corrosion resistance stems from Cr³⁺/Mo⁴⁺-enriched passive films, proposing a strategy for designing high-performance alloys in corrosive environments.
Hydrogen induced cracking behavior of the dualphase Co30Cr10Fe10Al18Ni30Mo2 eutectic high entropy alloy	In this paper, the hydrogen induced cracking behavior of the Co30Cr10Fe10Al18Ni30Mo2 eutectic high entropy alloy was studied. The results showed that the strength and ductility of the alloy decreased after hydrogen pre-charging, and quasi-cleavage fracture features and hydrogen-induced cracks were found. Moreover, the cracks induced by hydrogen precharging were found to propagate along the two-ph…	Qiancheng Zhao; Hong Luo; Zhongsheng Yang; Zhimin Pan; Zhijun Wang; R.K. Islamgaliev; Xiaogang Li	2024	International Journal of Hydrogen Energy	10.1016/j.ijhydene.2023.09.053	CoCrFeAlNiMo	Co30Cr10Fe10Al18Ni30Mo2 (eutectic HEA	Null	BCC phase and two-phase interface	Null	Hydrogen induced cracking behavior	Reduced strength/ductility after hydrogen charging; quasi-cleavage fracture and crack propagation along BCC phase/interfaces	Null	Hydrogen-induced cracks propagate preferentially along BCC phase and interfacial regions, weakening mechanical properties.
Influence of anelastic recovery on the cyclic creep behavior of AlCoCrFeNi2.1 eutectic high-entropy alloy	The AlCoCrFeNi2.1 eutectic high-entropy alloy (EHEA) is regarded as a promising candidate for structural materials in high-temperature equipment, which may experience the cyclic creep and anelastic recovery caused by -low-frequency peak-shaving loading. To investigate the influence of anelastic recovery on the microstructure and cyclic creep behavior of AlCoCrFeNi2.1 EHEA, the stress-varying (SV)…	Chuanyang Lu; Peng Wang; Siyu Luo; Yafei Li; Run-Zi Wang; Yanming He; Zengliang Gao; Shan-Tung Tu	2024	International Journal of Fatigue	10.1016/j.ijfatigue.2023.108111	AlCoCrFeNi	AlCoCrFeNi₂.₁ (eutectic high-entropy alloy, EHEA)	stress-varying (SV) and stress-constant (SC) tests at 800 °C	B2 phase (dual-phase microstructure)	Stress-varying cyclic creep tests, back stress theory analysis	Influence of anelastic recovery on cyclic creep behavior and microstructural evolution	Accelerated steady-state creep rate (SSCR) with cyclic-creep cycles and valley stress	Linking anelastic-recovery-induced microstructural changes in B2 phase to cyclic creep behavior via back stress theory	Anelastic recovery during valley-stress holding alters B2 phase microstructure via back stress, driving cyclic creep evolution and enhancing understanding of high-temperature deformation in dual-phase EHEAs.
Insights into the passivity and electrochemistry of CoCrFeMnNi high entropy alloy fabricated by underwater laser direct metal deposition	Underwater laser direct metal deposition (UDMD) was employed to deposit CoCrFeMnNi High entropy alloy. The deposition layer exhibits a homogeneous microstructure with cellular grains and dislocation networks. Anodic passivation contributes to thicker and denser passive films in high resistivity compared to that formed in spontaneous passivation, and the film growth kinetics in both processes foll…	Mingzhi Chen; Zhiyuan Jia; Zhandong Wang; Chao Xiang; Jibin Pu; Guifang Sun; En-Hou Han	2024	Corrosion Science	10.1016/j.corsci.2024.112289	CoCrFeMnNi	CoCrFeMnNi (equiatomic HEA)	Electrochemical passivation anodic/spontaneous) in high-resistivity environments	Null	Underwater laser direct metal deposition (UDMD), point defect model (PDM) analysis	Microstructural homogeneity, passive film formation, and elemental distribution under passivation	Thicker/denser passive films, amorphous bilayer structure, stratified elemental distribution (Cr/Fe homogeneous; Mn inner layer, Co outer layer, Ni subsurface)	UDMD-processed HEA with enhanced passive film control via anodic passivation and unique elemental stratification	Anodic passivation in high-resistivity environments yields corrosion-resistant passive films with optimized elemental stratification, governed by PDM kinetics.
Investigation on oxidation behavior and mechanical properties of FeCoNiNbAlCrTa high entropy alloy at 900 ◦C	In recent years, eutectic high entropy alloys have been found to have excellent mechanical properties and corrosion resistance; however, the simultaneous achievement of these mechanical properties and hightemperature oxidation resistance still constitutes a tough challenge. In this study, Ta and Cr elements are added to (FeCoNiNb)98Al2 high-entropy alloy to improve oxidation resistance, and the c…	Huaqing Yi; Liuqing Ni; Bingbing Yin; Mengtian Liang; Hongzhi Yang; Yi Yang	2024	Journal of Materials Research and Technology	10.1016/j.jmrt.2024.11.250	FeCoNiNbTaCrAl	(FeCoNiNb)₉₈₋₂ₓ(TaCr)ₓAl₂ (variable x via Ta/Cr addition)	Oxidation at 900 °C	Laves phase (matrix), CrTaO₄/CrNbO₄/Cr₂O₃ composite oxide scales	Null	Effect of Ta/Cr addition on microstructure, mechanical properties, and high-temperature oxidation resistance	Enhanced oxidation resistance, retained mechanical properties, protective oxide layer formation blocking O/matrix element diffusion	Ta/Cr co-doping to stabilize Laves phase and form composite oxide scales for oxidation-mechanical balance	Ta/Cr addition enables dual optimization of oxidation resistance (via CrTaO₄/CrNbO₄/Cr₂O₃ scales) and mechanical performance, guiding HEA design for high-temperature applications.
Mechanical behavior of high entropy alloys with gyroid nanostructures	High-entropy alloys have attracted growing attention due to their outstanding mechanical properties. Recent advances in nanofabrication offer novel avenues for customizing material properties via precise control over cellular nanostructures. However, comprehending the relationship between high-entropy alloy structures and mechanical properties when coupled with artificial nanostructures poses a p…	Van-Lam Nguyen; Minh-Quan Doan; Dang Thi Hong Hue; Van-Hai Dinh; Le Van Lich	2024	Intermetallics	10.1016/j.intermet.2024.108348	High-entropy alloy (HEA)	Null	Null	Null	Molecular dynamics (MD) simulations	Mechanical properties of HEAs with artificial gyroid nanostructures	Young’s modulus, tensile strength, strain softening behavior, dislocation evolution patterns, yielding stress, ultimate tensile strength	Gyroid nanostructure design (strut/node dominance, relative density control) to tailor mechanical responses	Gyroid nanostructures mitigate strain softening via density control and node/strut dominance, outperforming stochastic bicontinuous nanostructures in strength at equivalent densities
Microstructural development and mechanical behavior of a near-eutectic high entropy alloy Al1.8CrCuFeNi2 fabricated by hot isostatic pressing	In this study, a near-eutectic high entropy alloy Al1.8CrCuFeNi2 was processed by hot isostatic pressing (HIP). It is shown that the as-HIPed alloy demonstrates excellent formability and shows uniform and refined B2 grains. Large Cr0.7Fe0.3 precipitates were found at the grain boundaries while nano-sized Cu, Cu3Ni and Fe–Cr particles were uniformly distributed within the grain interior. The fine …	Xingyu Pan; Xintian Wang; Chunlei Qiu	2024	Intermetallics	10.1016/j.intermet.2024.108361	AlCrCuFeNi	Al₁.₈CrCuFeNi₂	Null	B2 matrix, Cr₀.₇Fe₀.₃ precipitates (grain boundaries), Cu/Cu₃Ni/Fe–Cr nano-precipitates (grain interior)	Hot isostatic pressing (HIP)	Microstructure evolution, mechanical properties (compressive strength, hardness), and deformation mechanisms	Compressive strength (~1800 MPa), hardness (~470 HV)	HIP-induced refined B2 grains and multi-scale precipitates enabling multiple strengthening mechanisms (precipitate strengthening, dislocation interactions, stacking faults)	High strength arises from synergistic effects of precipitate strengthening, dislocation slip in B2/Cr₀.₇Fe₀.₃, and stacking fault formation in Fe–Cr nanoparticles, demonstrating HIP-processed AlCrCuFeNi₂ as a high-performance HEA.
Microstructure evolution and solidification mechanism of CoCrFeNiMoNb high entropy alloy coating by laser cladding	Because of its excellent wear resistance and corrosion resistance, CoCrFeNi-based HEA has been selected as the coating prepared on steels to improve its service life. This paper presents single-track CoCrFeNiMo0.2Nb0.2 HEA cladding layers fabricated at different laser scanning speeds on an AISI H13 steel substrate. The grain morphology, microstructure and elemental distribution are illustrated. T…	Tao Wu; Litao Yu; Xu Shuai; Yihang Fang; Xiaofeng Zheng; Lingfeng Zhang; Yanpeng Xue; Yonghao Lu; Benli Luan	2024	Intermetallics	10.1016/j.intermet.2024.108345	CoCrFeNiMoNb	CoCrFeNiMo₀.₂Nb₀.₂	Laser cladding on AISI H13 steel substrate at varying scanning speeds	Retained austenite matrix, (Mo)NbC phase (grain boundary), eutectic structure (middle section)	Laser cladding process, microstructure analysis (grain morphology, elemental distribution)	Microstructure evolution, phase formation, and solidification mechanisms of HEA coatings	Grain refinement with increased scanning speed, (Mo)NbC phase formation (600 nm grain size), Fe content variation	Mo/Nb addition as carbide-forming elements to create nano-scale (Mo)NbC phase via laser-induced thermal Marangoni flow and solidification	Laser scanning speed controls grain refinement and (Mo)NbC phase distribution, providing insights for optimizing HEA coatings on steel substrates via microstructure design
Oxidation resistance of AlCoFeNiCux high entropy alloys	The oxidation behavior of as-cast AlCoFeNiCux (x = 0.6–3.0) high entropy alloys was studied by isothermal annealing in flowing synthetic air at 1000 ◦C. A formation of an external protective Al2O3 scale has been found. The oxidation kinetics followed a parabolic rate law. The rate constants were increasing with increasing Cu concentration in the alloys. A scale spallation on the alloys with highe…	Marian ´ Palcut; Marian ´ Drienovský; Pavol Priputen; Patrik Sulh ˇ anek ´; Peter Stacho; Zaneta ˇ Gerhatov ´ a´; Peter Gogola; Jozef Krajˇcoviˇc; Lucia Bonov ´ a´; Martin Kusý	2024	Journal of Materials Research and Technology	10.1016/j.jmrt.2024.06.185	AlCoFeNiCu	AlCoFeNiCuₓ (x=0.6–3.0)	Isothermal annealing at 1000°C in flowing synthetic air	Al₂O₃ protective scale, CuO, CuAl₂O₄ (post-spallation)	Isothermal oxidation, parabolic kinetics analysis	Oxidation behavior, scale formation, and spallation mechanisms	Parabolic rate constants (increasing with Cu content), scale spallation severity, CuO/CuAl₂O₄ formation	Role of Cu content in destabilizing protective Al₂O₃ scales via spallation and promoting non-protective oxide phases	Higher Cu content accelerates oxidation kinetics by inducing scale spallation, enabling oxygen penetration and formation of CuO/CuAl₂O₄, thereby degrading oxidation resistance compared to lower-Cu alloys.
Oxidation resistance of aluminized refractory HfNbTaTiZr high entropy alloy	In the present study, an equimolar HfNbTaTiZr refractory high entropy alloy was subjected to powder-pack aluminizing at 950◦C for 4 h. High-temperature isothermal oxidation tests were carried out in open air on both as-cast and aluminized samples at 1000◦C for the durations of 5, 25, and 125 h. Microstructural analysis and oxidation kinetics revealed the formation of a complex oxide layer consist…	Ali Günen; Kadir Mert Doleker ; Erdogan ˘ Kanca; Mst Alpona Akhtar; Kunjal Patel; Sundeep Mukherjee	2024	Journal of Alloys and Compounds	10.1016/j.jallcom.2024.175100	HfNbTaTiZr	Equimolar HfNbTaTiZr (as-cast and aluminized via powder-pack process)	Isothermal oxidation at 1000°C in open air for 5–125 h	(Hf,Zr)O₂, Al₂O₃, AlN (aluminized samples); oxide layer with cracking after prolonged exposure	Powder-pack aluminizing (950°C, 4 h), high-temperature oxidation kinetics, microstructural analysis	Oxidation resistance of aluminized vs. as-cast RHEA, oxide layer formation, and degradation mechanisms	Mass gain reduction (1.18–3.60× lower in aluminized samples), adherent oxide layer acting as diffusion barrier	Aluminizing process forming protective (Hf,Zr)O₂/Al₂O₃/AlN composite oxide layer to suppress oxidation	Aluminized HfNbTaTiZr exhibits superior oxidation resistance due to protective oxide layers, though cracking after 125 h limits long-term stability.
Phase stability and transition of CrTaVW high-entropy alloy	Refractory high-entropy alloys (RHEAs) are susceptible to phase transition at elevated temperatures, inducing deviation in the phase constitution from the intended design hence affecting the performance significantly. Accurate prediction of phase constitution and modulation of phase stability over a broad temperature range is crucial to develop RHEAs with superior properties. In this study, therm…	Xiaoyu Fu; Yurong Li; Chao Hou; Hao Lu; Xiaoyan Song	2024	Journal of Alloys and Compounds	10.1016/j.jallcom.2024.175481	CrTaVW	CrTaVW alloy system with variable V/W doping in TaCr₂ Laves phase	Null	TaCr₂ Laves phase (BCC structure), solid solutions	Thermodynamic calculations, first-principles simulations, experimental validation	Temperature-dependent phase constitution, V/W occupation effects on Laves phase stability, and phase transition mechanisms	Gibbs free energy of phases, electronic density at Fermi level (for alloying ability), critical phase transition temperatures	Integrated computational-experimental approach to predict and modulate Laves phase stability via V/W doping	V preferentially occupies Cr sites in TaCr₂, enhancing Laves phase stability more effectively than W; tailored V/W content enables control of phase transitions and stability for high-temperature RHEA design
Preparation of TiZrHfNbMo refractory high entropy alloy powder via hydrogen plasma-arc melting	Refractory high-entropy alloys (RHEAs) are a new type of metal materials composed of four or more refractory elements. However, the melting point and liquid viscosity coefficient of RHEAs are high, which leads to low fluidity. Therefore, powders of such alloys are difficult to prepare by conventional methods. In this study, a new method called a hydrogen plasma-arc melting has been developed for …	Xiangyang Shen; Guishen Zhou; Feng Liu; Fuyu Dong; Yue Zhang; Xiaoguang Yuan; Binbin Wang; Liangshun Luo; Yanqing Su; Jun Cheng; Peter K. Liaw	2024	Intermetallics	10.1016/j.intermet.2024.108435	TiZrHfNbMo	TiZrHfNbMo (equimolar RHEA)	Null	BCC	Hydrogen plasma-arc melting	RHEA powder preparation method, phase structure, composition homogeneity, and oxygen content analysis	Average particle size (66.97 μm), absence of composition segregation, reduced oxygen content	Novel hydrogen plasma-arc melting method enabling RHEA powder synthesis with high homogeneity and low oxygen	Hydrogen plasma-arc melting successfully prepares TiZrHfNbMo RHEA powders with single BCC phase, uniform composition, and reduced oxygen, overcoming conventional processing limitations.
Remarkable improved strength and ductility in brittle eutectic high-entropy alloy via a novel spheroidization and recrystallization strategy	Eutectic high-entropy alloys (EHEAs), as a classification of high-entropy alloys (HEAs), have received worldwide interest due to superior fluidity and attractive properties. However, other than the FCC + B2 EHEA system, most other reported EHEA systems show inherent brittleness during tensile loading at room temperature, which limits their advanced engineering application. In this work, a novel s…	Lingkun Zhang; Rui Huang; Fengrui Zhou; Abdukadir Amar; Hongwei Yan; Yongan Zhang; Yiping Lu	2024	Journal of Materials Science & Technology	10.1016/j.jmst.2023.11.050	CoCrFeNiVBSi	CoCrFeNi₂(V₆B₃Si)₀.₁₄₉	Null	FCC (recrystallized) + M₃B₂ (spheroidized) dual-phase	Spheroidization + recrystallization (SR) thermomechanical processing	Synergistic strengthening and plasticizing mechanisms in brittle EHEA via phase engineering	Yield strength (841–1278 MPa, +48–126% vs. as-cast), elongation (14.7–22.5%, +539–878% vs. as-cast)	SR strategy enabling dual-phase heterostructure (FCC/M₃B₂) for simultaneous strength-ductility enhancement via back stress and stress homogenization	SR-processed EHEA achieves unprecedented strength-ductility synergy through FCC recrystallization and M₃B₂ spheroidization, offering scalable industrial solutions for brittle EHEA systems
Role of Electronegativity on the Elemental Diversity in High-Entropy Alloys.	High-entropy alloys (HEAs) or multi-principal element alloys (MPEAs) have found extensive applications in high-precision devices. While the increased configurational entropy for HEAs favors more elemental diversity, it also increases the possibility of phase separation into multiple heterogeneous systems.This article reports that these two mutually competing effects are balanced for 3- and 4-comp…	R. A. Oshiya; B. Varghese; Ayan Datta	2024	American Chemical Society	10.1021/jacs.4c04342	HEAs/MPEAs	3- and 4-component alloys	Null	Balanced phase separation (metalloid nature in van Arkel-Ketelaar triangle)	Materials database analysis (∼5×10⁵ compounds), electronegativity (EN) parameterization, van Arkel-Ketelaar triangle modeling	Prevalence of 3-/4-component alloys in HEAs/MPEAs, EN-driven phase separation balance, metalloid behavior analysis	70% of n-component alloys in databases are 3-/4-component; optimal EN difference (0.5–1.0) and EN sum (5.0–6.5)	Identification of 3-/4-component alloys as dominant in HEAs due to balanced EN parameters and metalloid nature in van Arkel-Ketelaar centroid	3-/4-component alloys balance configurational entropy and phase separation via intermediate EN parameters, explaining their prevalence (>70%) in material systems and metalloid characteristics
Sensitivity of reduction rate on the mechanical response of boron-doped Fe50Mn30Co10Cr10 high entropy alloy	Phase transformation induced plasticity (TRIP) effect is an effective technical solution to enhance the strength and ductility of alloys, represented by Fe50Mn30Co10Cr10 high entropy alloy (HEA). Introducing heterostructures into alloys is also an effective synergistic method for enhancing the strength and ductility of alloys. Combining element doping, heterostructures, and the TRIP effect of the…	Qian Li; Lei Tian; Xiaolin Li; Xiangtao Deng; Haifeng Wang	2024	Journal of Alloys and Compounds	10.1016/j.jallcom.2024.174030	FeMnCoCrB	Fe₅₀Mn₃₀Co₁₀Cr₁₀ + boron doping	Null	Heterogeneous grain structure (small/large grains) with TRIP effect (FCC ↔ HCP phase transformation)	Cold rolling (varying reduction rates), recrystallization annealing, mechanical testing	Synergy of TRIP effect and heterostructure design via boron doping and thermomechanical processing for strength-ductility balance	Enhanced strength-ductility synergy in low-reduction samples; high reduction weakens ductility due to stress concentration	Integration of boron doping, TRIP effect, and controlled heterostructure (via rolling/annealing) to overcome strength-ductility trade-off	Optimal low rolling reduction and recrystallization annealing enable synergistic TRIP-heterostructure effects, achieving high strength and ductility in FeMnCoCrB HEA
Strong yet ductile (FeCoNi)86Al7Ti7 high-entropy alloy via laser powder bed fusion	High entropy alloys (HEAs) are renowned for their outstanding mechanical properties and thermal stability, yet their complex compositions pose significant processing challenges. This study introduces an innovative approach using Laser Powder Bed Fusion (LPBF) to directly fabricate the (FeCoNi)86Al7Ti7 HEA, bypassing the extensive post-processing typically required. Unlike Vacuum Arc Melting (VAM)…	Shiliang Wu; Haitao Wang; Sujuan Wang; Wenshuai Liu	2024	Materials Today Communications	10.1016/j.mtcomm.2024.110285	FeCoNi-Al-Ti	(FeCoNi)₈₆Al₇Ti₇	Null	Refined cellular substructures, elemental segregation, L₂₁ phase nano-precipitates	Laser Powder Bed Fusion (LPBF) vs. Vacuum Arc Melting (VAM), microstructure analysis, tensile testing	LPBF-induced microstructure refinement and its impact on mechanical properties compared to VAM-processed HEA	LPBF-produced alloy achieves ultimate tensile strength (1221.6 MPa) and tensile strain (32.6%), surpassing VAM-produced alloy (972.5 MPa, 8.8% strain).	LPBF enables direct fabrication of HEA with refined microstructure (cellular/L₂₁ phases) without post-processing, enhancing strength-ductility synergy.	LPBF outperforms VAM by producing (FeCoNi)₈₆Al₇Ti₇ HEA with superior mechanical properties (1221 MPa UTS, 32.6% strain), demonstrating its transformative potential for streamlined high-performance HEA manufacturing.
Study of phase evolution and phase stability in a novel FCC based Al30Ti35Mg5V10Fe8Cr12 lightweight high-entropy alloy processed by mechanical alloying	High-entropy alloys (HEAs) have gained significant attention from researchers due to their exceptional mechanical properties. While most the reported lightweight high-entropy alloys have Body Centered Cubic (BCC), Hexagonal Close Packed (HCP), and complex intermetallic phases, there is growing interest in development of Face Centered Cubic (FCC) based Lightweight High-Entropy Alloys (LWHEA) for a…	Ayush Sourav; Ankit Singh Negi; Pranjal Chauhan; T. Sudeep Kumar; Shanmugasundaram Thangaraju	2024	Journal of Alloys and Metallurgical Systems	10.1016/j.jalmes.2024.100142	AlTiMgVFeCr	Al₃₀Ti₃₅Mg₅V₁₀Fe₈Cr₁₂	Null	FCC + BCC dual-phase structure (milled and sintered states)	Mechanical alloying, spark plasma sintering (SPS at 890°C/60 MPa/15 min), XRD/SEM analysis, Gibbs free energy calculations	Design and synthesis of FCC-based LWHEA, phase stability analysis, and mechanical/microstructural characterization	Hardness of 550 ± 18 HV (5.3 GPa), theoretical density of 4.5 g/cm³, retained FCC phase stability via thermodynamic optimization.	Multivariate element/thermodynamic optimization strategy to stabilize FCC phase in lightweight HEA, enabling energy-efficient applications.	The Al₃₀Ti₃₅Mg₅V₁₀Fe₈Cr₁₂ LWHEA achieves a dual-phase FCC+BCC structure with low density (4.5 g/cm³) and high hardness (550 HV), demonstrating success in designing FCC-stable LWHEAs through computational-experimental synergy.
Synthesis and characterization of a novel Full-Heusler high entropy intermetallic compound-(FeCoNi)2TiSb	A novel Full-Heusler high entropy intermetallic compound (FH-HEIC) - (FeCoNi)2TiSb has been synthesized by combining vacuum arc melting (VAM), ball-milling (BM) and spark plasma sintering (SPS) techniques. The effect of different preparation conditions on the structure and magnetic properties of the compound has been investigated. The structure of (FeCoNi)2TiSb compound is composed of ordered L21…	Zhiyou Lu; Yongkang Tan; Youlin Huang; Xiaoma Tao; Hongmei Chen; Yu Bu; Yifang Ouyang	2024	Intermetallics	10.1016/j.intermet.2024.108343	FeCoNi-Ti-Sb	(FeCoNi)₂TiSb	Null	Ordered L₂₁ + disordered A₂ dual-phase structure (L₂₁ content increases after ball milling and SPS)	Vacuum arc melting (VAM), ball milling (BM), spark plasma sintering (SPS), structural/magnetic characterization	Impact of processing (BM time, SPS) on phase evolution (L₂₁/A₂ ratio) and magnetic properties (saturation magnetization, coercivity)	Optimal ball milling (20 h) achieves high L₂₁ phase fraction, yielding saturation magnetization (M<sub>s</sub>) = 37.8 emu/g and coercivity (H<sub>c</sub>) = 106 Oe at 100 K; M<sub>s</sub> positively correlates with L₂₁ phase content.	First synthesis of Full-Heusler high-entropy intermetallic compound (FH-HEIC) with tunable L₂₁/A₂ phase ratio via BM/SPS, enabling magnetic property modulation	(FeCoNi)₂TiSb FH-HEIC exhibits soft magnetic behavior (high M<sub>s</sub>, low H<sub>c</sub>) with L₂₁ phase dominance achieved through optimized BM/SPS processing, guiding future magnetic material design in FH-HEICs.
Tensile and impact behavior of 3D-printed (FeCoNi)86Al7Ti7 high entropy alloy at ambient and cryogenic temperatures	High-entropy alloys (HEAs) demonstrate superior mechanical properties at room temperature, highlighting potential for engineering applications. With the increasing demand for advanced materials, especially in modern applications facing rigorous conditions, it becomes imperative to gain profound insights into the dynamic behavior of HEAs. In this study, the (FeCoNi)86Al7Ti7 HEA, renowned for excep…	Li-Xue Liu; Jie Pan; Peng-Cheng Zhang; Rong Guo; Jing-Yu Xu; Lin Liu	2024	Materials & Design	10.1016/j.matdes.2024.113020	FeCoNi-Al-Ti	(FeCoNi)₈₆Al₇Ti₇	Tensile and impact testing at ambient (293 K) and cryogenic (77 K) temperatures	Cellular substructures (from SLM), dislocation slip, stacking faults, Lomer-Cottrell locks	Selective laser melting (SLM), tensile/Charpy impact testing, microstructure analysis (SEM/TEM)	Cryogenic tensile/impact behavior analysis, deformation mechanisms (dislocation slip, stacking faults, Lomer locks), and fracture mechanisms	At 77 K, the alloy achieves ultimate tensile strength of 1313.6 MPa with 24.8% ductility, while Charpy impact energy decreases from 8.1 J (293 K) to 5.1 J (77 K) due to restricted dislocation mobility and intergranular crack propagation.	SLM-processed HEA reveals dual temperature-dependent behavior: enhanced tensile strength-ductility at 77 K via multi-mechanism synergy (dislocation/stacking fault/Lomer locks), yet degraded impact toughness from defect-induced fracture.	(FeCoNi)₈₆Al₇Ti₇ HEA exhibits exceptional cryogenic tensile performance (1313 MPa, 24.8% strain) but reduced impact resistance at 77 K, guiding its application in extreme environments requiring strength-ductility balance over impact tolerance
Stacking ensemble learning assisted design of Al-Nb-Ti-V-Zr lightweight high-entropy alloys with high hardness	To improve the accuracy and efficiency of machine learning models in predicting and designing the mechanical properties and designing of lightweight high-entropy alloys, we have trained multi-classification machine learning models using stacking ensemble method. This ensembled model achieves high prediction accuracy of 0.9457 and good anti-overfitting performance. Two candidate high-entropy alloy…	Qiaobing Chen; Zijian He; Yi Zhao; Xuan Liu; Dianhui Wang; Yan Zhong; Chaohao Hu; Chenggang Hao; Kecheng Lu; Zhongmin Wang	2024	Materials & Design	10.1016/j.matdes.2024.113363	AlNbTiVZr	Al0.38Ti0.36V0.05Zr0.16Nb0.05, Al0.51Ti0.28V0.04Zr0.16Nb0.01		HCP and FCC	stacking ensemble learning model	design of lightweight high-hardness HEAs via machine learning	hardness	developed a high-accuracy stacking ensemble model for HEA design	Our machine learning approach is highly effective in predicting the hardness of high-entropy alloys, with accuracy that has been experimentally verified, thereby significantly enhancing the efficiency of designing new lightweight high-hardness high-entropy alloys.
Temperature-dependent mechanical behavior in a novel hierarchical B2-strengthened high entropy alloy: Microscopic deformation mechanism and yield strength prediction	Integration of twinning and hierarchical microstructure into a face-centered cubic (FCC) matrix is a novel research approach for high-entropy alloys (HEAs). However, how the hierarchical B2 structures influence the mechanical behavior over a wide temperature range has not been clearly understood. In this study, a novel FCC matrix-based B2-strengthened HEA with hierarchical structure was developed…	Tuanwei Zhang; Renlong Xiong; Hui Chang; Jinxiong Hou; Dan Zhao; Zhong Wang; Zhouzhu Mao; Tianxiang Bai; Zhiming Jiao; Jianjun Wang; Zhihua Wang	2024	Materials & Design	10.1016/j.matdes.2024.113488	NiCoCrFeAl0.3Si0.3		77–973 K	FCC matrix + B2 phase	experimental + yield strength modeling	temperature-dependent mechanical behavior and strengthening	yield strength, strain hardening	Three-level B2 phase provides high strength and thermal stability	The B2 phase enhances yield strength across wide temperature range without compromising ductility.
Multi-scale ceramic TiC solves the strength-plasticity equilibrium problem of high entropy alloy	High entropy alloys (HEAs) with single FCC structure exhibits unique structure and properties, but the strength-plasticity trade-off remains a challenge. In this study, multi-scale TiC particles (micro and nano) were introduced into an Al0.4 HEA matrix via powder metallurgy and spark plasma sintering (SPS) techniques. The microstructure, phase composition and mechanical properties were systematic…	Hao Qi; Siruo Zhang; Chenghao Liu; Rongde Li; Shulin Dong; Guanglong Li; Yingdong Qu	2024	Materials & Design	10.1016/j.matdes.2024.113374	Al0.4-TiC (μm + nm)			FCC + TiC second phase	mechanical testing and microstructure analysis	strength-plasticity balance in HEAs	YS ↑145%, UTS 574 MPa, 30.1% plastic strain	multi-scale TiC improves both strength and ductility	Multi-scale TiC effectively reinforces HEAs without sacrificing plasticity.
Investigate on dissimilar welding of high-entropy alloy and 310S with various fillers	This study investigates the microstructure and mechanical properties of non-equimolar CoCrFeMoNi high-entropy alloy (HEA) and SUS310S stainless steel dissimilar welds. Three different filler wires (Inconel 82, Inconel 625 and 316L) were used for gas tungsten arc welding (GTAW). The study aims to evaluate the effects of different filler materials on joint formation, microstructure, and mechanical …	Chihhsien Liao; Tingen Shen; Weichen Hsu; Hsiencheng Wu; Chenchou Chung; Chunlung Peng; Chewei Tsai	2024	Materials & Design	10.1016/j.matdes.2024.113454	CoCrFeMoNi / SUS310S		GTAW using Inconel 82, 625, 316L		tensile and hardness testing	dissimilar welding performance	Hardness 170 HV, YS 301 MPa, UTS 587 MPa, joint efficiency 106%	Different fillers influence weldability and joint performance	Inconel 625 filler showed best strength and ductility among tested fillers.
Nanostructure-induced functional combination of vanishing magnetostriction and magnetic softness in ferromagnetic (GaNi)xCoCrFe (x = 0.4–1.6) high-entropy alloys	Searching for high-entropy alloys with functional properties that emerge from their multi-scale structure, we have investigated the (GaNi)xCoCrFe (x = 0.4–1.6) system. The alloys are single-phase, nanostructured, ferromagnetic, and possess vanishing magnetostriction at room temperature. The vanishing magnetostriction stems from the suppression of magnetoelastic coupling by structural disorder. In…	Jože Luzar; Andreja Jelen; Juraj Nálepka; Saeid Salari; Primož Koželj; Stanislav Vrtnik; Peter Mihor; Julia Petrović; Magdalena Wencka; Goran Dražić; Anton Meden; Pavol Priputen; Janez Dolinšek	2024	Materials & Design	10.1016/j.matdes.2024.113396	(GaNi)xCoCrFe	x = 0.4–1.6	AC electromagnetic applications, audio-frequency range	fcc + nanostructured bcc	magnetic, magnetostrictive and electrical property measurements	magnetic softness and vanishing magnetostriction	Curie temperature 700–750K, Tf ≈ 6.4K	nanomagnetic phenomena enable ‘supersilent’ functional materials	x = 1.3 and 1.6 alloys are highly suitable for AC applications due to combined properties.
Oxidation behaviour of Ti-V-Cr-Nb-Ta and Al-Ti-V-Cr-Ta refractory high entropy alloys: Effects of Nb and Al substitutions	Refractory high entropy alloys (RHEAs) are candidate materials for nuclear and other high-temperature applications. Their oxidation resistance is crucial. In this study, oxidation behaviors of Ti-V-Cr-Nb-Ta and Al-Ti-V-Cr-Ta RHEAs were investigated at 1000 °C in air. The microstructures and oxidation mechanisms were studied using XRD, SEM, and hardness testing. It was found that Al substitution s…	Kieran Rivers; Bradley Young; Yuanbo T. Tang; Bo-Shiuan Li; Angus J. Wilkinson; David E.J. Armstrong; Junliang Liu	2024	Materials & Design	10.1016/j.matdes.2024.113370	20Ti-20V-20Cr-20Nb-20Ta; 25Ti-25V-5Cr-20Nb-25Ta; 20Al-20Ti-20V-20Cr-20Ta; 14Al-24Ti-24V-14Cr-24Ta		oxidation in air at 1000°C	oxide layer formation, porous vs compact	oxidation test + microscopy	oxidation resistance of RHEAs and Al/Nb substitution effect	oxide porosity, matrix hardness ↑ ~5 GPa	Al substitution improves oxidation resistance	Al-rich RHEAs show better oxidation behavior and denser oxide layer.
Revealing different corrosion behaviors of Cr-containing refractory high-entropy alloy coatings in static liquid lead–bismuth eutectic	Five Cr-containing refractory high-entropy alloy (RHEA) coatings were prepared by magnetron sputtering and tested in static liquid Pb–Bi eutectic at 550 and 650 °C. Their corrosion behaviors were systematically analyzed using SEM, XRD, and cross-sectional analysis. Results revealed that the coatings exhibit different corrosion resistances depending on their phase structure. Among them, TiNbCrMoV …	Jiuguo Deng; Wei Zhang; Xi Qiu; Mingyang Zhou; Yi Zhou; Ning Liu; Jijun Yang	2024	Materials & Design	10.1016/j.matdes.2024.113192	TiNbCrMoV; TiNbZrCrV; CrNbZrMoV; TiCrZrMoV; TiNbZrMoCr		550–650°C in static liquid Pb-Bi eutectic	BCC (TiNbCrMoV), others amorphous	corrosion exposure + structure analysis	corrosion resistance of Cr-containing RHEA coatings	corrosion resistance ranking among coatings	BCC coating with grain boundaries shows best protection	Grain boundary-assisted diffusion promotes protective oxide in TiNbCrMoV.
Synergistic effects of Monel 400 filler wire in gas metal arc welding of CoCrFeMnNi high entropy alloy	Weldability plays a crucial role in the journey of high entropy alloys towards their engineering applications. This study explores the effects of Monel 400 filler wire on the weld quality and mechanical properties of CoCrFeMnNi HEAs welded by gas metal arc welding (GMAW). Microstructural analysis showed that the fusion zone consisted of FCC phases and dispersed carbides and Cr-Mn oxides. Hardness…	Jiajia Shen; Yeon Taek Choi; Rita Gonçalves; Norbert Schell; Jin Yang; Zhi Zeng; Ana Catarina Baptista; Hyoung Seop Kim; J.P. Oliveira	2024	Materials & Design	10.1016/j.matdes.2024.112996	CoCrFeMnNi + Monel 400		GMAW process	FCC + carbides + Cr-Mn oxides	GMAW + microstructure analysis + hardness mapping + DIC	fusion zone microstructure and mechanical response	solid-solution strengthening, texture shift, mechanical improvement	Monel 400 filler enhances micro/macro mechanical performance	Process-microstructure-properties correlation guides engineering applications.
Improved corrosion resistance of laser melting deposited CoCrFeNi-series high-entropy alloys by Al addition	The microstructural evolution, pitting performance, and passive-film properties of AlxCoCrFeNi high-entropy alloys (HEAs) fabricated via laser melting deposition (LMD) were investigated using material characterization techniques and electrochemical measurements. The substrates of the LMD HEAs transform from a face-centred cubic (FCC) to a body-centred cubic (BCC) structure with increasing Al addi…	Chuanlang Zhang; Liufei Huang; Shuxin Li; Kun Li; Siyuan Lu; Jinfeng Li	2023	Corrosion Science	10.1016/j.corsci.2023.111599	AlxCoCrFeNi	Null	Null	from FCC to BCC	material characterization techniques and electrochemical measurements	The microstructural evolution, pitting performance, and passive-film properties	Null	The substrates of the LMD HEAs transform from a face-centred cubic (FCC) to a body-centred cubic (BCC) structure with increasing Al addition	The substrates of the LMD HEAs transform from a face-centred cubic (FCC) to a body-centred cubic (BCC) structure with increasing Al addition.Ternary-phase HEA with Al addition of 10 mol.% exhibits the best corrosion resistance, which is attributed to favourable modifications in the Cr2O3 content and passive-film thickness.
Improvement in corrosion resistance of biocompatible Ti1.5Al0.3ZrNb refractory high entropy alloy in simulated body fluid by nanosecond laser shock processing	A biocompatible Ti1.5Al0.3ZrNb refractory high-entropy alloy (RHEA) with high specific strength and superior tensile ductility is developed. The activation of multiple slip systems and dislocations cross-slip facilitate dislocation interactions, improving the plastic deformability and continuous strain hardening ability of the Ti1.5Al0.3ZrNb RHEA. After laser shock processing (LSP), the surface r…	Jingyu Pang; Boxin Wei; Hongwei Zhang; Yu Ji; Zhengwang Zhu; Long Zhang; Huameng Fu; Hong Li; Aimin Wang; Haifeng Zhang	2023	Corrosion Science	10.1016/j.corsci.2023.111484	Ti1.5Al0.3ZrNb	Null	Null	Null	laser shock processing (LSP)	corrosion resistance	the resistance Rct is 2.29 × 10^5Ωcm^2	This surface morphology significantly improves the corrosion resistance of the RHEA in simulated body fluid. Combining the RHEAs with LSP techniques could offer the opportunity to break existing corrosion limitation, and obtain substantial performance improvement.	The improved corrosion resistance of LSPTi1.5Al0.3ZrNb is ascribed to multiple LSP-induced compressive residual stress, grain refinement and high-density dislocations.
Corrosion-resistant L12-strengthened high-entropy alloy with high strength and large ductility	Corrosion-resistant alloys with high strength and large ductility are desirable for applications in harsh environments where high structural load-carrying capacity is required. In this work, we designed an L12-strengthened high-entropy alloy (HEA) of composition (NiCo)77Cr13Al5Nb5 (at.%) that combines excellent mechanical properties and good corrosion resistance. The formation of a thin passive f…	Zhang JY; Chou TH; Zhou YH; Luan JH; Zhao YL; Yang T	2023	Corrosion Science	10.1016/j.corsci.2023.111593	(NiCo)77Cr13Al5Nb5	Null	in harsh environments	Null	Null	Corrosion-resistant, mechanical properties	high strength and large ductility	L12-strengthened high-entropy alloy	The precipitation strengthening brought about by coherent L12 particles and the multi-stage plastic deformation dominated by stacking faults (SFs) provides ultrahigh strength and appreciable ductility, respectively.
Effect of Al addition on the corrosion behavior of AlxCoCrFeNi high entropy alloys in supercritical water	The effect of Al addition on the corrosion behavior of high entropy alloys AlxCoCrFeNi (x = 0, 0.1, and 1.0) in supercritical water was investigated. The weight gain and oxide film thickness reduced with the increase of Al content. A duplex-structure oxide film, consisting of FeCr2O4 outer and Cr2O3 inner layer, was developed on CoCrFeNi alloy. A triple-layered oxide film consisting of FeCr2O4 ou…	Huang Xi; Zhao Qi; Zhan Zixiong; Liu Junxiong; Liao Xinhua; Deng Jincheng; Wei Lihua; Li Xiaoyan	2023	Corrosion Science	10.1016/j.corsci.2023.111089	AlxCoCrFeNi (x = 0, 0.1, and 1.0)	Al addition	in supercritical water	Null	Null	corrosion behavior	weight gain and oxide film thickness	The effect of Al addition	The improvement of corrosion resistance by adding Al was attributed to the high Al concentration that accelerated the formation of Al2O3.
Effect of Cu content on the microstructure and corrosion resistance of AlCrFeNi3Cux high entropy alloys	The FCC+B2/BCC structure of AlCrFeNi3Cux (x = 0 eutectic, x = 0.2, 0.4 hypo-eutectic, x = 0.6, 0.8, 1.0 dendritic) high-entropy alloys were fabricated and corrosion behaviours were investigated. In 3.5 wt% NaCl solution, pitting occurred initially in the B2 phases of all alloys. The values of corrosion rate, icorr and ipassfirst increased and then decreased with increasing Cu content. The AlCrFeN…	Wang Jianming; Jiang Hui; Chang Xiaoxue; Zhang Lijun; Wang Haixia; Zhu Lin; Qin Shengxue	2023	Corrosion Science	10.1016/j.corsci.2023.111313	AlCrFeNi3Cux	Cu content	In 3.5 wt% NaCl solution	FCC+B2/BCC	corrosion behaviours	Null	icorr and ipass	Null	The AlCrFeNi3Cu0.4 alloy exhibited optimal corrosion resistance attributed to the increased passive film protection and reduced the volume fraction of B2 phases.
Effects of co-alloying Al and Cu on the corrosion behavior and mechanical properties of nanocrystalline FeCrNiCo high entropy alloys	The complex element composition and enormous composition space of high entropy alloys (HEAs) adds more uncertainty to the material properties. Here, a series of nanocrystalline AlxCuy(FeCrNiCo)100− x-y (x = 6.44–50.51 at%, y = 8.49–40.31 at%) HEAs were high-throughput synthesized. Co-alloying Al and Cu effects on the corrosion resistance of FeCrNiCo HEAs were systematically investigated in a two-…	Song Youpeng; Yan Luchun; Pang Xiaolu; Su Yanjing; Qiao Lijie; Gao Kewei	2023	Corrosion Science	10.1016/j.corsci.2023.110983	AlxCuy(FeCrNiCo)100	x-y (x = 6.44–50.51 at%, y = 8.49–40.31 at%)	Null	Null	Null	corrosion resistance, the microstructure and mechanical properties	hardness and plasticity	Co-alloying Al and Cu	Experimental results show that nanocrystalline Al16.29Cu13.04(FeCrNiCo)70.67 and Al19.59Cu17.08(FeCrNiCo)63.33 alloys have balanced corrosion resistance, hardness and plasticity
Fe61.5Cr17.5Ni13Al8 high-entropy alloy: A study of corrosion behavior	The corrosion behavior for a newly-developed FeCrNiAl alloy with excellent mechanical properties in both NaCl and H2SO4 solutions has been investigated. This alloy has an fcc/bcc dual-phase microstructure with equiaxed fcc grains and equiaxed or lamellar bcc grains. The corrosion resistance of the alloy is excellent in both solutions, originating mainly in galvanic corrosion together with many sm…	Li MW; Cao QP; Wang XD; Ding SQ; Zhang DX; Jiang JZ	2023	Corrosion Science	10.1016/j.corsci.2023.111302	FeCrNiAl	Null	in both NaCl and H2SO4 solutions	fcc/bcc dual-phase	Null	mechanical properties, corrosion behavior	passive film	Null	Our results demonstrate that the alloy has potential industrial applications in the environment containing Cl - and SO4 − 2 ions.
High corrosion resistance of twin boundaries in medium-entropy alloy exposed to liquid lead-bismuth eutectic at 500 ◦C: Mechanism exploration by both experiment and first-principles calculation	The present study discovered the twin boundaries (TBs) of CoCrNi medium-entropy alloy (MEA) exhibited high corrosion resistance to liquid lead-bismuth eutectic (LBE) at 500 ◦C with 5 × 10− 7 mass% dissolved oxygen. The grain boundaries (GBs) were corroded by LBE, forming brittle Bi3Ni phases in LBE interior and at the LBE/CoCrNi interface. First-principles calculation indicated that the Bi diffus…	Hu Yanying; Niu Yitian; Chen Jinhong; Zhou Hang; Zhou Pujun; Ma Xianfeng; Wang Da; Liu Wenguan; Gong Xing	2023	Corrosion Science	10.1016/j.corsci.2022.110865	CoCrNi	Null	at 500 ◦C with 5 × 10− 7 mass% dissolved oxygen	Bi3Ni phases	Null	corrosion resistance	the Bi diffusion energy barriers	Null	The high diffusion barrier for Bi atom in CoCrNi MEA contributed to the high corrosion resistance of TBs in the liquid LBE.
Cooperative effect of Cr and Al elements on passivation enhancement of eutectic high-entropy alloy AlCoCrFeNi2.1 with precipitates	In conventional corrosion-resistant alloys, precipitation usually reduces corrosion resistance severely by weakening passive films locally. In this work, we found that the aging-treated AlCoCrFeNi2.1 samples, which have abundant nanosized L12 and body-centered cubic (BCC) precipitates in the lamellar face-centered cubic (FCC) and B2 phases, displayed better corrosion resistance than solution-trea…		2023	Journal of Materials Science & Technology	10.1016/j.jmst.2022.07.023	AlCoCrFeNi2.1	Null	Aging-treated, Solution-treated	Lamellar FCC phase with L12 precipitates, B2 phase with BCC precipitates	Microstructure characterization, X-ray diffraction	Corrosion resistance, Precipitation behavior	Enhanced corrosion resistance, Improved passive film stability	Introduction of nanosized L12 and BCC precipitates to improve corrosion resistance	The formation of BCC precipitates significantly enhanced the corrosion resistance of the eutectic high-entropy alloy AlCoCrFeNi2.1, particularly by stabilizing the passive films.
Enhanced pitting corrosion resistance of CoCrFeMnNi high entropy alloy in the presence of Desulfovibrio vulgaris via nitrogen doping	8.Corrosion-resistant high nitrogen high entropy alloys (HEAs) were manufactured by pressurized metallurgy. This work revealed the inhibitory effect of nitrogen on pitting corrosion of HEAs caused by sulfate reducing bacterium Desulfovibrio vulgaris. Results indicated that HEA-0 N was susceptible to pitting corrosion and sulfidation under attack of D. vulgaris, whereas the addition of nitrogen si…	Chuntian; Yang; and; Hao; Feng; and; Xiaobo; Chen; and; Yu; Han; and; Huabing; Li; and; Dake; Xu; and; Fuhui; Wang	2023	Journal of Materials Science & Technology	10.1016/j.jmst.2022.08.021	High nitrogen high-entropy alloys (HEAs)	Varying nitrogen conten	Sulfate reducing bacterium Desulfovibrio Vulgaris	Null	Pressurized metallurgy, X-ray photoelectron spectroscopy	Microbial corrosion resistance	Increased pitting potentials, Enhanced passive film stability	Nitrogen doping improves resistance to microbial corrosion	The study revealed that nitrogen addition inhibits pitting corrosion caused by sulfate-reducing bacterium, enhancing material's microbial corrosion resistance..
Effect of interstitial carbon and nitrogen on corrosion of FeCoCrNi multi-principal element alloys made by selective laser melting	The corrosion behaviors of selective laser melted (SLMed) FeCoCrNi multi-principal element alloys (MPEAs) with carbon or nitrogen addition in 0.5 M H2SO4 solution were investigated. Both C and N addition refined the grains and introduced a heterogeneous structure in SLMed FeCoCrNi MPEA, but they had opposite effects on the corrosion behavior. The doped carbon participated as nano-sized carbides i…	Wenyu Chen and Rui Zhou and Wanpeng Li and Yen-Hsiang Chen and Tzu-Hsiu Chou and Xu Wang and Yong Liu and Yuntian Zhu and J.C. Huang	2023	Journal of Materials Science & Technology	10.1016/j.jmst.2022.10.027,	FeCoCrNi	Carbon, Nitrogen	0.5 M H2SO4	CrN chemical clusters	Selective Laser Melting	Corrosion behavior	Corrosion resistance, Galvanic corrosion	Effects of carbon and nitrogen on corrosion behavior	The doped nitrogen formed protective CrN chemical clusters and improved corrosion resistance, while doped carbon degraded it.
Efficient prediction of corrosion behavior in ternary Ni-based alloy systems: Theoretical calculations and experimental verification	14.Pourbaix diagrams are calculated to describe electrochemical processes for alloys in aqueous solution. With the multi-component differentiation of alloy systems, the construction of Pourbaix diagrams is fac- ing challenges, especially for non-single-phase alloy systems. In this study, the simultaneous construction of phase diagrams and Pourbaix diagrams were implemented for predicting the evol…	Xuelian Xiao and Keke Chang and Kai Xu and Ming Lou and Liping Wang and Qunji Xue	2023	Journal of Materials Science & Technology	10.1016/j.jmst.2023.05.042	Ni-Si-Al-Y system (Ni-Al-Si, Ni-Al-Y)	Null	Aqueous solution	Solid solution	Phase diagrams, Pourbaix diagrams, CALPHAD	Corrosion prediction, Electrochemical processes	Corrosion resistance	Efficient prediction of corrosion behavior using thermodynamic database	The study demonstrates efficient and accurate prediction of corrosion behavior using well-constructed thermodynamic databases.
Heat treatment effects on the metastable microstructure, mechanical property and corrosion behavior of Al-added CoCrFeMnNi alloys fabricated by laser powder bed fusion	With the development of aerospace and transportation, high-strength structural materials manufactured by additive manufacturing techniques get more attention, which allows the production of counterparts with complex structures. This work investigates Al-added CoCrFeMnNi high-entropy alloys (Al-HEAs) pre-pared by laser powder bed fusion (PBF-LB), adding 4.4 wt.% Al reducing approximately 7% densit…	Decheng Kong and Li Wang and Guoliang Zhu and Yiqi Zhou and Xiaoqing Ni and Jia Song and Liang Zhang and Wenheng Wu and Wei Wu and Cheng Man and Da Shu and Baode Sun and Chaofang Dong	2023	Journal of Materials Science & Technology	10.1016/j.jmst.2022.08.018	Al-added CoCrFeMnNi	4.4 wt.% Al	Null	FCC Matrix, BCC Phase	Post-heat-treatment	Microstructure, Mechanical properties, Corrosion behavior	Yield strength (1000 MPa for Al-HEA850), Ductility, Pitting corrosion resistance	Framework for heat treatment effects on high-strength HEAs	 Built a framework on the effects of heat treatment on mechanical properties and degradation behavior in additively manufactured Al-added HEAs.
Clarify the role of Nb alloying on passive film and corrosion behavior of CoCrFeMnNi high entropy alloy fabricated by laser powder bed fusion	20.Effect of Nb alloying on passive film and corrosion behavior of laser powder bed fused CoCrFeMnNi high entropy alloy (HEA) was studied by microstructure analysis, electrochemical analysis and X-ray photoelectron spectroscopy. Nb alloying refined the grain size, promoted the Laves phase precipitation, and changed the inclusion type of the HEA. The improved corrosion resistance evidenced by incr…	Zhen Zhang and Xiaofeng Li and Hong Yi and Huiqi Xie and Zhanyong Zhao and Peikang Bai	2023	Corrosion Science	10.1016/j.corsci.2023.111510	CoCrFeMnNi	Null	Null	Laves phase	Microstructure analysis, electrochemical analysis, X-ray photoelectron spectroscopy	The role of Nb alloying on passive film and corrosion behavior	Increased pitting potential, polarization resistance	Nb alloying	The improved corrosion resistance evidenced by increased pitting potential and polarization resistance was achieved by Nb alloying. Nb addition decreased the donor and acceptor density of the passive film, and altered its composition.
Corrosion behavior and passive film characteristics of AlNbTiZrSix high-entropy alloys in simulated seawater environment	The corrosion and passive behavior of AlNbTiZrSix high-entropy alloys (HEAs) with different Si contents were investigated in simulated seawater environment at room temperature. The results showed that the average grain size decreased with an increase in Si content, which was associated with the inhibiting effect on grain growth due to the precipitation of Zr5Al3 phase. The passive film of the HEA…	Da Bi and Yue Chang and Hong Luo and Zhimin Pan and Qiancheng Zhao and Hongxu Cheng and Xuefei Wang and Chunyu Qiao and Zeqing Ni and Aoyu Liu and Xiaogang Li	2023	Corrosion Science	10.1016/j.corsci.2023.111530	AlNbTiZrSix	Si contents	simulated seawater environment, at room temperature	Null	Null	Corrosion resistance	Average grain size	Null	the addition of Si reduced passive film stability, worsening corrosion resistance.
Effect of alloying elements (Mn, Ti, and Mo) on the corrosion behavior of FeCoNiCr-based high entropy alloy in supercritical water	27.The effect of alloying elements, Mn, Ti, and Mo, on the corrosion behavior of FeCoNiCr-based high entropy alloy (HEA) in supercritical water was investigated. The corrosion resistance of the HEA was enhanced by adding Mo while reduced with the addition of Ti and Mn. The segregation of Ti and Mo resulted in the formation of oxide films that were both structurally and chemically heterogeneous. G…	Qi Zhao and Xi Huang and Zixiong Zhan and Shanliang Zhou and Junxiong Liu and Pengcheng Zhu and Lihua Wei and Xiaoyan Li and Congyi Li and Yujun Xie	2023	Corrosion Science	10.1016/j.corsci.2023.111291	FeCoNiCr-based	Adding Mo, addition of Ti and Mn	Supercritical water	Null	Null	Corrosion behavior	Oxide films	Alloying elements	The corrosion resistance of the HEA was enhanced by adding Mo while reduced with the addition of Ti and Mn.
Microbiologically influenced corrosion of CoCrFeMnNi high entropy alloy by sulfate-reducing bacterium Desulfovibrio vulgaris	Sulfate-reducing bacterium Desulfovibrio vulgaris promoted the microbiologically influenced corrosion (MIC) of CoCrFeMnNi high entropy alloy (HEA) and led to pitting corrosion. D. vulgaris caused the formation of metal sulffdes and thinning of passive film. The corrosion resistance decreased, and pit depths increased when the carbon source reduced to 40%. The relative expression of hydrogenase ge…	Wang, Di ; Yang, Chuntian ; Zheng, Borui ; Yang, Minghao ; Gao, Yu ; Jin, Yuting ; Dong, Yizhe ; Liu, Pan ; Zhang, Mingxing ; Zhou, Enze ; Gu, Tingyue search by orcid ; Xu, Dake search by orcid ; Wang, Fuhui	2023	Journal of Materials Science & Technology	10.1016/j.corsci.2023.111429	CoCrFeMnNi	Null	Carbon source	Null	Null	Microbiologically influenced corrosion	indirect electron transfer mediated by 2H+/H2	sulfate-reducing bacterium Desulfovibrio vulgaris	Sulfate-reducing bacterium Desulfovibrio vulgaris promoted the microbiologically influenced corrosion (MIC) of CoCrFeMnNi high entropy alloy (HEA) and led to pitting corrosion.D. vulgaris caused the formation of metal sulffdes and thinning of passive film.
Tribo-corrosion resistance of Ti-Nb-Cr-Mo-Al refractory high-entropy alloys in molten aluminum	29.Ti40Nb25Cr15Mo10Al10 and Ti40Nb20Cr20Mo10Al10 refractory high-entropy alloys (RHEAs) were designed and fabricated, aiming at investigating their mechanical properties, corrosion and tribo-corrosion behavior in molten aluminum. Compared with H13 steel, these RHEAs exhibit signiffcantly better combinations of high-temperature mechanical properties, corrosion and tribo-corrosion resistance. Low s…	Xin Yang ; Zhiqiang Fu ; Weiping Chen ; Shanqing Li ; Hao Wang ; Sheng Guo	2023	Journal of Materials Science & Technology	10.1016/j.corsci.2023.111521	Ti40Nb25Cr15Mo10Al10, Ti40Nb20Cr20Mo10Al10	Content of Cr	in molten aluminum	Null	Null	mechanical properties, corrosion, tribo-corrosion behavior	Solubility	Null	Compared with H13 steel, these RHEAs exhibit signiffcantly better combinations of high-temperature mechanical properties, corrosion and tribo-corrosion resistance.Additionally, higher content of Cr in RHEAs would lead to worse tribo-corrosion resistance.
Effect of annealing temperature on the microstructure evolution and corrosion behavior of Carbon-interstitial FeMnCoCrNi high-entropy alloys	32.The microstructure evolution, corrosion resistance, and passive-film properties of an interstitial FeMnCoCrNi high-entropy alloys annealed at different temperature were investigated. Deformation twins, Strip-shape and ellipsoidal M23C6 carbides are remained within grains and precipitated along the grain boundaries of the HEAs annealed at 500 and 700 ◦C. The 900 ◦C annealed i-Cantor alloys are …	Zijing Jin , Fengchao An , Shuxin Li , Zhongyu Cui , Wenjun Lu , Siyuan Lu	2023	Journal of Materials Science & Technology	10.1016/j.corsci.2023.111813	FeMnCoCrNi	Carbon-interstitial	annealing temperature	Null	Null	The microstructure evolution, corrosion resistance, and passive-film properties	Null	i-Cantor alloys	The corrosion resistance of the cold-rolled HEAs was deteriorated by annealing at 500 and 700 ◦C, but improved by annealing at 900 ◦C, which decreases the dislocation densities and depresses the Cr-depleted regions in i-Cantor alloys.
Synergistic effects of grain sizes on the corrosion behavior and mechanical properties in a metastable high-entropy alloy	31.Synergistic effects of grain sizes on corrosion behavior and mechanical properties of metastable high-entropy alloys (HEAs) were studied. The results exhibit that the corrosion resistance of metastable HEA increases first and then decreases with grain size increases. This difference in corrosion behavior is manifested in different degrees of passive film dissolution and pitting corrosion, and …	Kejie Lu and Zhenrui Lei and Shuai Deng and Jiahao Li and Tengfeng Feng and Zhengyang Luo and Xinkai Ma	2023	Corrosion Science	10.1016/j.corsci.2023.111588	Meta-stable high-entropy alloys	Null	Grain size	Null	Null	corrosion behavior, mechanical properties	passive film dissolution and pitting corrosion	Null	The results exhibit that the corrosion resistance of metastable HEA increases first and then decreases with grain size increases.
A map of single-phase high-entropy alloys	39.High-entropy alloys have exhibited unusual materials properties. The stability of equimolar single-phase solid solution of five or more elements is supposedly rare and identifying the existence of such alloys has been challenging because of the vast chemical space of possible combinations. Herein, based on high-throughput density-functional theory calculations, we construct a chemical map of s…	Wei Chen, Antoine Hilhorst, Georgios Bokas, Stéphane Gorsse, Pascal J. Jacques & Geoffroy Hautier	2023	Nature Communications	10.1038/s41467-023-38423-7	AlCoMnNiV, CoFeMnNiZn	Null	Null	body-centered cubic, face-centered cubic	Null	Null	Null	Null	predicting the existence of two new high-entropy alloys
The inhibitive action of 2-mercaptobenzothiazole on the porosity of corrosion film formed on aluminum and aluminum-titanium alloys in hydrochloric acid solution	47.2-Mercaptobenzothiazole (2-MBT) in a solution of 0.5 M HCl is an effective corrosion inhibitor for aluminum and aluminum–titanium alloys. Tafel polarization and electrochemical impedance spectroscopy (EIS) were employed to assess this heterocyclic compound’s anticorrosive potential and complementary by scanning electron microscope (SEM) and calculating porosity percentage in the absence and pr…	Abdel-Rahman El-Sayed 1, Morad M El-Hendawy 2, Mohamed Sarwat El-Mahdy 3, Fatma S M Hassan 3, Adila E Mohamed	2023	Scientific Reports	10.1038/s41598-023-31795-2	Aluminum and Aluminum–Titanium alloys	Null	0.5 M HCl solution	Null	Tafel polarization, Electrochemical Impedance Spectroscopy (EIS), SEM analysis, Density Functional Theory (DFT), Monte Carlo simulations	Corrosion inhibition mechanism	Inhibition efficiency (IE%), Activation energy (Ea), Adsorption parameters (ΔHadso Delta H_{ads}^oΔHadso​, ΔGadso Delta G_{ads}^oΔGadso	2-Mercaptobenzothiazole as an effective corrosion inhibitor; reduced porosity percentage.	2-MBT significantly reduces porosity and improves corrosion resistance through adsorption, validated by both experimental and theoretical findings.
Investigating the tribological characteristics of copper surface composites reinforced with high entropy alloy (AlCoCrCuFe) through friction stir processing	52.The present investigation focuses on the fabrication of Copper-High Entropy Alloy (HEA) surface Metal Matrix Composite (MMC) using the solid-state Friction Stir Process (FSP) and the characterization of wear characteristics. Higher hardness values at the level of 770HV were the cornerstone in its selection, in addition to identifying several appropriate considerations for combining the AlCoCrC…	Seenivasan Soundararajan 1, Gopal Pudhupalayam Muthukutti 2, Soorya Prakash Kumarasamy 3, Kavimani Vijayananth 2, Debabrata Barik 4, Prabhakar Sharma 5, Prabhu Paramasivam	2023	Scientific Reports	10.1038/s41598-023-49557-5	AlCoCrCuFe	Null	Sliding wear test	Fine microstructure	Friction Stir Processing (FSP), SEM analysis	Wear resistance improvement	Hardness (770 HV), Wear rate, Coefficient of Friction (CoF)	Combination of FSP and HEA for enhanced wear resistance.	HEA addition improves wear resistance and decreases wear rate.
Effects of laser powder bed fusion process parameters on microstructure and hydrogen embrittlement of high-entropy alloy	Hydrogen embrittlement behavior, micro-deformation, and crack propagation mechanism of CoCrFeNiMn high-entropy alloy (HEA) fabricated by laser powder bed fusion (LPBF) under different parameters were investigated by slow strain rate tensile tests (at room temperature) with/without electrochemical hydrogen pre-charging. The LPBF CoCrFeNiMn HEA shows excellent resistance to hydrogen embrittlement. …	Hongxu Cheng; Hong Luo; Zhimin Pan; Xuefei Wang; Qiancheng Zhao; Yu Fu; Xiaogang Li	2023	Journal of Materials Science & Technology	10.1016/j.jmst.2022.12.074	CoCrFeNiMn	LPBF-fabricated CoCrFeNiMn high-entropy alloy (HEA) with varied processing parameters	Slow strain rate tensile tests (room temperature) with/without electrochemical hydrogen pre-charging	Cellular structure (LPBF-induced) + deformation twins (hydrogen-charged)	Laser powder bed fusion (LPBF), EBSD/ECCI/TEM analysis, hydrogen embrittlement testing	hydrogen embrittlement resistance, deformation twin formation, crack propagation mechanisms, strain hardening behavior	Strain hardening rate, stacking fault energy (SFE) reduction, hydrogen-induced strain hardening platform, defect density (microcracks/holes)	LPBF cellular structure mitigates hydrogen embrittlement via strain hardening platforms; hydrogen-induced deformation twins enhance work hardening	LPBF CoCrFeNiMn exhibits excellent hydrogen embrittlement resistance due to cellular structures and hydrogen-induced deformation twins. Suboptimal LPBF parameters introduce microcracks but retain strain hardening platforms. Hydrogen lowers SFE, promoting nano-twins and crossing twin systems, which compensate for strain hardening loss.
L21-strengthened face-centered cubic high-entropy alloy with well pitting resistance	Effect of phase structure and composition on the passive film properties and pitting behavior of L21-strengthened (CoCrFeNi)86Al7Ti7 high-entropy alloy (HEA) in 3.5 wt.% NaCl was investigated. Results shown that the bilayer amorphous passive film enriched in Cr-, Fe-oxides/hydroxides on (Fe, Cr)-rich FCC phase and that enriched in Ti- , Ni-oxides on (Ni, Al, Ti)-rich L21 phase both contributed to…	Liang Wei; Wei-Min Qin; Jing-Yao Chen; Wen-Xin Lei; Jin-Yang Xi	2023	Corrosion Science	10.1016/j.corsci.2023.111043	CoCrFeNiAlTi	(CoCrFeNi)₈₆Al₇Ti₇ (L21-strengthened HEA)	3.5 wt.% NaCl solution	FCC (Fe,Cr-rich), L21 (Ni,Al,Ti-rich)	Null	Passive film properties and pitting behavior related to phase structure/composition	Pitting resistance via Cr/Fe-oxide-rich (FCC) and Ti/Ni-oxide-rich (L21) passive films; microgalvanic corrosion between FCC (cathode) and L21 (anode) phases	Synergistic role of bilayer amorphous passive films (Cr/Fe vs. Ti/Ni oxides) and microgalvanic effects in pitting nucleation	Pitting initiates at FCC-L21 interfaces due to Cl⁻-induced passive film breakdown on L21 phase, driven by microgalvanic corrosion between phases.
Nanoscale high-entropy alloy for electrocatalysis	High-entropy alloys (HEAs) are a new kind of alloy with five or more alloy elements at equal or near-equal ratios. The tunable multicomponent structure and potential novel properties of HEAs have attracted widespread attention. Benefiting from advances in synthesis technology, nanoscale HEAs were acquired successfully, the high specific surface area and quantum size effect of which further improv…	Xiao Han; Geng Wu; Shuyan Zhao; Jingjing Guo; Muyu Yan; Xun Hong; Dingsheng Wang	2023	Matter	10.1016/j.matt.2023.03.034	High-entropy alloys (HEAs)	Five or more elements at equal/near-equal ratios	Null	Null	Synthesis/characterization technologies, high-throughput screening	Structural features, catalytic performance (electrocatalysis), and synergistic elemental effects	Null	High-throughput screening to overcome trial-and-error limitations; nanoscale HEAs with enhanced catalytic capacity via quantum size effects	Structural understanding and high-throughput methods enable rational design of HEA-based high-efficiency catalysts
SLM Fe50Mn30Co10Cr10 metastable high entropy alloy with Al-Ti addition: Synergizing strength and ductility	Developing high entropy alloys that possess both high strength and high ductility have achieved significant progress in recent years. In this study, the metastable high entropy alloy Fe50Mn30Co10Cr10 with Al-Ti addition was formed by SLM technology. The effect of Al-Ti addition on the microstructure and mechanical properties were investigates. The results shown that: with the addition of Al-Ti ad…	Yixi Hou; Zhanjiang Li; Li Chen; Zhongnan Xiang; Pinqiang Dai; Junfeng Chen	2023	Journal of Alloys and Compounds	10.1016/j.jallcom.2023.168830	FeMnCoCrAlTi	Fe₅₀Mn₃₀Co₁₀Cr₁₀ + 1 at.% Al/Ti	Null	TiAl intermetallics, nanoscale L₁₂ precipitates, TRIP (FCC ↔ HCP), TWIP (twinning)	Selective laser melting (SLM), microstructure analysis, tensile testing	Al/Ti addition effects on grain refinement, precipitation strengthening, and TRIP/TWIP synergy for strength-ductility balance	Yield strength (543.5 MPa, +110.2%), tensile strength (854.2 MPa, +35.5%), elongation (31.8%, +70.1%) vs. base alloy; TRIP/TWIP co-activation during deformation	Dual Al/Ti addition induces TiAl/L₁₂ precipitates and activates TRIP/TWIP mechanisms for multi-mechanism strengthening-plasticizing synergy	Al/Ti-modified FeMnCoCr alloy achieves exceptional strength-ductility balance via grain refinement, nanoscale precipitates, and TRIP/TWIP effects, demonstrating SLM-processed HEAs’ potential for advanced structural applications
Ultra-high strength and excellent ductility high entropy alloy induced by nano-lamellar precipitates and ultrafine grain structure	We describe the development of a non-equiatomic CoCrFeNi2Al0.3Ti0.25 high entropy alloy (HEA). Both highdensity nano-lamellar precipitates and ultrafine grain structure are simultaneously introduced by cold rolling then annealing at 600–800 ◦C for 1 h. The HEA annealing at 700 ◦C (CR-700) exhibits ultra-high yield strength (σy) of 1900 ± 15 MPa, ultimate tensile stress of 2074 ± 17 MPa and excell…	A.X. Li; P.F. Yu; Y.P. Gao; M.T. Dove; Gong Li	2023	Materials Science & Engineering A	10.1016/j.msea.2022.144286	CoCrFeNi-Al-Ti	CoCrFeNi₂Al₀.₃Ti₀.₂₅	Null	FCC matrix with L₁₂ nano-lamellar precipitates, ultrafine grains (UFG), stacking faults, Lomer-Cottrell locks, and coherent FCC/L₁₂ interfaces	Cold rolling + annealing (600–800°C/1 h), tensile testing, microstructure characterization (TEM/SEM)	Synergistic effects of nano-lamellar precipitates and ultrafine grains on strength-ductility balance, deformation mechanisms (dislocation transmission, stacking faults), and work-hardening behavior	Annealing at 700°C (CR-700) achieves ultra-high yield strength (1900 ± 15 MPa), ultimate tensile strength (2074 ± 17 MPa), and ductility (16.7 ± 1.5% elongation), representing a 171% increase in yield strength and 54% reduction in ductility compared to as-cast alloy	Dual-phase nano-lamellar precipitates and ultrafine grains introduced via cold rolling/annealing overcome the strength-ductility trade-off; coherent FCC/L₁₂ interfaces enable stress-relief dislocation transmission, while stacking faults/Lomer-Cottrell locks enhance work hardening.	The CoCrFeNi₂Al₀.₃Ti₀.₂₅ HEA demonstrates exceptional strength-ductility synergy (1900 MPa YS, 16.7% elongation) through tailored microstructure design, offering a scalable strategy for ultra-high-strength alloys via nano-lamellar/UFG engineering.
A stable oxygen evolution splitting electrocatalysts high entropy alloy FeCoNiMnMo in simulated seawater	Stabilizing anode for oxygen evolution (OER) in chlorine-containing electrolytes is a significant challenge. Adding corrosion inhibitors in electrolytes can alleviate this problem, but the type and dosage of corrosion inhibitors need a lot of exploration, and side reactions may occur to reduce current efficiency. Herein, we prepared a FeCoNiMnMo High entropy alloy (HEA) electrode for OER in simul…	Peng Li; Yuanpeng Yao; Wengen Ouyang; Ze Liu; Huayi Yin; Dihua Wang	2022	Journal of Materials Science & Technology	10.1016/j.jmst.2022.08.012	FeCoNiMnMo	Null	Null	Null	Null	great electrocatalytic activity and excellent stability	overpotential (η) = 237 mV at 10 mA cm–2,200 h at 100 mA cm–2	The tightly adsorbed state of Cl–and K2MoO4 ensures that other oxides are not corroded. And the externally added K2MoO4 cannot protect the electrode. In addition, the high-entropy effect of HEA reduces the dissolution of the alloy	This work provides an efficient way to prepare a noble-free HEA catalyst that can stabilize oxygen evolution in corrosive electrolytes
An investigation on the corrosion performance of Fe2CoCrNi0.5 based high entropy alloys	The electrochemical and hot corrosion behaviors of Fe2CoCrNi0.5 based HEAs were investigated. The HEA with the best electrochemical corrosion resistance was Fe2CoCrNi0.5Si0.25Cu0.25 with Ecorr of ∗ 0.584 V, Icorr of 1.47 ×10–4 A/cm2. Fe2CoCrNi0.5Cu0.25 had the worst resistance to hot corrosion, as caused by the more severe attack and poor adherence of scale. However, Si addition contributed to be…	Yiğit Garip	2022	Corrosion Science	10.1016/j.corsci.2022.110497	Fe2CoCrNi0.5, Fe2CoCrNi0.5Si0.25Cu0.25	Si addition	Null	Nu;;	Null	electrochemical, hot corrosion behaviors	Ecorr, Icorr	Si addition contributed to better corrosion resistance.	The HEA with the best electrochemical corrosion resistance was Fe2CoCrNi0.5Si0.25Cu0.25, Fe2CoCrNi0.5Cu0.25 had the worst resistance to hot corrosion
Corrosion and passive behavior of AlxCrFeNi3- x (x= 0.6, 0.8, 1.0) eutectic high entropy alloys in chloride environment	The corrosion and passive behavior of the as-cast AlxCrFeNi3≥ x (x = 0.6, 0.8, 1.0 in molar ratio) high entropy alloys in 3.5 wt% NaCl solution at room temperature was investigated by the electrochemical impedance spectroscopy, potentiodynamic polarization measurement, Mott-Schottky measurement, X-ray photoelectron spectroscopy tests, and scanning Kelvin probe force microscopy. The increase of th…	Zhao Qiancheng; Pan Zhimin; Wang Xuefei; Luo Hong; Liu Yang; Li Xiaogang	2022	Corrosion Science	10.1016/j.corsci.2022.110666	AlxCrFeNi3	Null	3.5 wt% NaCl solution, at room temperature	Null	electrochemical impedance spectroscopy, potentiodynamic, polarization measurement, Mott-Schottky measurement, X-ray photoelectron spectroscopy tests, and scanning Kelvin probe force microscopy	The corrosion and passive behavior	Null	Null	The increase of the Al content resulted in the decrease in corrosion resistance, which might be attributed to the reduction of stability and protection of passive films caused by composition difference.
Corrosion and tribo-corrosion behaviors of nano-lamellar Ni1.5CrCoFe0.5Mo0.1Nbx eutectic high-entropy alloy coatings: The role of dual-phase microstructure	In this work, the effect of the dual-phase microstructure (FCC and Laves phases) of Ni1.5CrCoFe0.5Mo0.1Nbx (x =0.55 hypoeutectic, 0.68 eutectic and 0.8 hypereutectic) high-entropy alloy coatings on their corrosion and tribocorrosion behaviors were studied. In a 3.5 wt.% NaCl solution, the FCC phase behaved as anodic sites. With the increase of Nb content, the passive regions of the coatings incre…	Wen Xin; Cui Xiufang; Jin Guo; Liu Yufei; Zhang YE; Zhang Xuerun; LiuErbao; Tian Haoliang; Fang Yongchao	2022	Corrosion Science	10.1016/j.corsci.2022.110305	Ni1.5CrCoFe0.5Mo0.1Nbx	Null	3.5 wt.% NaCl solution	FCC and Laves phases	Null	corrosion and tribo-corrosion behaviors	the passive regions of the coatings, passive film	Nb content	With the increase of Nb content, the passive regions of the coatings increased slightly. Mott–Schottky analysis revealed that the improvement in the performance of the passive film is mainly attributed to the reduced point-defect density. The increased Laves phase changed the wear mechanism of the coatings from adhesive to abrasive wear.
Corrosion behavior and mechanism of dual phase Fe1.125Ni1.06CrAl high entropy alloy	This investigation explores the corrosion behavior and mechanism of as-cast dual phase Fe1.125Ni1.06CrAl high entropy alloy with low density (6.65 g/cm3) and high hardness (460.67 kgf/mm2) in 3.5 wt% NaCl solution. The microstructure, elemental distribution and corrosion behavior of high entropy alloys before and after the corrosion process were investigated via electrochemical quantitative analy…	Cui Puchang; Bao Zhijia; Liu Yong; Zhou Fei; Lai Zhonghong; Zhou Ying; Zhu Jingchuan	2022	Corrosion Science	10.1016/j.corsci.2022.110276	Fe1.125Ni1.06CrAl, Fe1.125Ni1.125CrAl	Null	low density (6.65 g/cm3), high hardness (460.67 kgf/mm2), in 3.5 wt% NaCl solution	dual BCC, as-cast dual phase	Null	corrosion behavior, mechanism, The microstructure, elemental distribution	high hardness, distinguished corrosion resistance, corrosion current density, corrosion potential	Null	The results show that quaternary Fe1.125Ni1.06CrAl high entropy alloy display spinodal decomposition microstructure of dual BCC phase with high hardness and distinguished corrosion resistance compared with other established alloys. Oxides and hydroxides films of constitutional elements on the alloy surface are formed by X-ray photoelectron spectroscopy analysis, which indicates that corrosion pro…
Corrosion behavior of a dual-phase FeNiCrCuAl high entropy alloy in supercritical water	High-entropy alloys (HEAs) possess excellent irradiation resistance, however, their corrosion behavior in high temperature water requires further study. The corrosion behavior of a dual-phase FeNiCrCuAl HEA in supercritical water was investigated in this study. The oxidation kinetics follows a parabolic law. An outer FeAl2O4 layer and inner FeCr2O4 layer formed on the FeCr-rich BCC regions after …	Huang Xi; Zhan Zixiong; Zhao Qi; Liu Junxiong; Wei Lihua; Li Xiaoyan	2022	Corrosion Science	10.1016/j.corsci.2022.110617	FeNiCrCuAl	Null	in supercritical water, high temperature water	BCC, FCC, dual-phase	Null	corrosion behavior	Null	Null	An outer γ-Al2O3 layer and inner NiAl2O4 layer formed on the NiAl-rich BCC regions regardless of the exposure period. Irregular Cu2O particles were deposited on the samples owing to the localized corrosion of the Cu-rich FCC regions.
Corrosion behaviors and mechanism of CrFeNi2 based high-entropy alloys	Herein, a novel CrFeNi2-based multi-component alloy system was designed and the corrosion behaviors were investigated in 3.5 wt% NaCl solution. The single-phase FCC solid solution was observed in CrFeNi2 and CoCrFeNi2 alloys, while the lamellar eutectic structure composed of dual-phase formed in the AlCoCrFeNi2 alloy. The electrochemical results showed that the CrFeNi2-based alloys, with higher E…	Zhang Mengdi; Shi Xinliang; Li Ziyang; Xu Hanqing; Li Gong	2022	Corrosion Science	10.1016/j.corsci.2022.110562	CrFeNi2-based, CoCrFeNi2, AlCoCrFeNi2	Null	in 3.5 wt% NaCl solution	single-phase FCC, dual-phase	Null	corrosion behaviors	higher Epit and lower Icorr	Co-free	In the CrFeNi2-based alloy system, all examined specimens were suffered localized corrosion. The Co-free CrFeNi2 alloy possessed the best corrosion resistance, demonstrating the widest passivation region (approximately 1035 mVAg/AgCl), the highest pitting potential (954 mVAg/AgCl), and an outstanding repassivation ability.
Corrosion mechanism of eutectic high-entropy alloy induced by micro-galvanic corrosion in sulfuric acid solution	The corrosion behavior of AlCoCrFeNi2.1 eutectic high-entropy alloy (EHEA) in aerated 0.5 M H2SO4 solution was investigated. The initial and long-term corrosion of EHEA were respectively controlled by the micro-galvanic corrosion cells established between Cr-rich FCC (cathode) and Al-rich/Cr-depleted BCC (anode) phases and between the lamellar (anode) and irregular (cathode) regions. Correspondin…	Wei Liang; Qin Weimin	2022	Corrosion Science	10.1016/j.corsci.2022.110525	AlCoCrFeNi2.1	Cr-rich and Al-rich/Cr-depleted	in aerated 0.5 M H2SO4 solution	FCC, BCC	Null	corrosion behavior	electrochemical passivation property	Null	EHEA exhibited electrochemical passivation property comparable to 304 L stainless steel and superior corrosion resistance relative to most Al-containing dual-phase HEAs.
Effect of Ce on the localized corrosion behavior of non-equiatomic high-entropy alloy Fe40Mn20Cr20Ni20 in 0.5 M H2SO4 solution	The effect of rare earth cerium (Ce) on the localized corrosion behavior of the non-equiatomic Fe40Mn20Cr20Ni20 high-entropy alloys were investigated in 0.5 M H2SO4 solution. The corrosion resistance of the alloys increased with addition of Ce, which owing to the protectiveness and compactness of passive film was enhanced. The composition and shape of inclusions were modified by Ce, which resulte…	Zhicheng Zhang; Aidong Lan; Min Zhang; Junwei Qiao	2022	Corrosion Science	10.1016/j.corsci.2022.110489	Fe40Mn20Cr20Ni20	addition of Ce	in 0.5 M H2SO4 solution	Null	Null	corrosion resistance	the doping density and thickness	The effect of rare earth cerium (Ce) on the localized corrosion behavior of the non-equiatomic Fe40Mn20Cr20Ni20 high-entropy alloys	The corrosion resistance of the alloys increased with addition of Ce, which owing to the protectiveness and compactness of passive film was enhanced.
Enhanced corrosion resistance of CoCrFeMnNi high entropy alloy using heterogeneous structure design	High entropy alloys (HEAs) with heterogeneous grain structure exhibit an unprecedented combination of high strength and high ductility. Therefore, it is imperative to clarify corrosion behavior for various applications. In the present work, the corrosion behavior of harmonic structured (HS) CoCrFeMnNi HEAs with different shell fractions was investigated. The inhomogeneity of corrosion in the HS C…	Wang Jiapan; Zhang Zhe; Dai Hailong; Fujiwara Hiroshi; Chen Xu; Ameyama Kei	2022	Corrosion Science	10.1016/j.corsci.2022.110761	CoCrFeMnNi	Null	Null	Null	Null	corrosion behavior	high strength and high ductility.	different shell fractions	The peculiar core-shell network structure is beneficial to the corrosion resistance compared with the conventional coarse-grained (CG) or ultrafine-grained (UFG) structure.
High temperature chloride corrosion behavior of AlFe2.5NiMoNbCr high-entropy alloy	High temperature chloride corrosion tests of AlFe2.5NiMoNbCr high-entropy alloy were carried out comparing with those of Inconel625 and AlFeNiMoNb plate. Uniform dispersion of elements in the Cr depletion zone existed during the corrosion process of AlFe2.5NiMoNbCr high-entropy alloy promoted the formation of continuous Al2O3 layer, and the dendritic Al2O3 improved the adhesion of the corrosion l…	Bai Lingyun; Peng Wenyi; Zhu Jun; Wu Xuecheng; Shi Xiongtao; Xiang Junhuai; Deng Xiaohua; Wang Yuqing; Sun Zuxiang; Yu Siqi	2022	Corrosion Science	10.1016/j.corsci.2022.110139	AlFe2.5NiMoNbCr	Null	High temperature	Null	High temperature chloride corrosion tests	Null	Null	Al2O3/Cr2O3 double-layer	Al2O3/Cr2O3 double-layer makes AlFe2.5NiMoNbCr have better potential application value than Inconel625 with a single Cr2O3 layer
A comparative study on microstructure, nanomechanical and corrosion behaviors of AlCoCuFeNi high entropy alloys fabricated by selective laser melting and laser metal deposition	1.The present study investigated the microstructure, nanomechanics, and corrosion behavior of AlCoCuFeNi high entropy alloys fabricated by selective laser melting (SLM) and laser metal deposition (LMD). The microstructure of SLM-processed specimens was mainly composed of columnar-grained BCC matrix ( ∼90 μm in width) and Cu-rich twinned FCC phase. The columnar grains grew epitaxially along the bu…	Ren; Yaojia; and; Wu; Hong; and; Liu; Bin; and; Liu; Yong; and; Guo; Sheng; and; Jiao; ZB; and; Baker; Ian	2022	Journal of Materials Science & Technology	10.1016/j.jmst.2022.05.035	AlCoCuFeNi	Null	Null	Columnar-grained BCC matrix (~90 μm width), Cu-rich twinned FCC phase (SLM-processed); Coarse columnar-grained BCC matrix (~150 μm width), rod-like B2 precipitates, large core-shell structured FCC phases (LMD-processed)	Selective Laser Melting (SLM), Laser Metal Deposition (LMD)	Microstructure, Nanomechanics, Corrosion behavior	Hardness (SLM-processed: X HV, LMD-processed: Y HV), Wear resistance, Corrosion resistance, Creep resistance, Young’s modulus	Heat accumulation effect in LMD-processed specimens leads to the formation of different microstructures	LMD-processed specimens showed lower hardness, wear resistance, and corrosion resistance but higher creep resistance and reduced Young’s modulus compared to SLM-processed specimens.
Corrosion engineering boosting bulk Fe50Mn30Co10Cr10 high-entropy alloy as high-efficient alkaline oxygen evolution reaction electrocatalyst	Oxygen evolution reaction (OER) is a critical process in electrocatalytic water splitting. However, the development of low-cost, highly efficient OER electrocatalysts by a simple method that can be used for industrial application on a large scale is still a huge challenge. Recently, high entropy alloy (HEA) has acquired extensive attention, which may provide answers to the current dilemma. Here, …	Pengfei; Zhou; Dong; Liu; Yuyun; Chen; Mingpeng; Chen; Yunxiao; Liu; Shi; Chen; Chi; Tat; Kwok; Yuxin; Tang; Shuangpeng; Wang; Hui; Pan	2022	Journal of Materials Science & Technology	10.1016/j.jmst.2021.09.003	Fe50Mn30Co10Cr10	Null	Overpotential 247 mV, Current density 10 mA/cm², 1 M KOH solution	Honeycomb nanostructures	 3D Printing, Electrochemical measurement	Oxygen Evolution Reaction (OER), Corrosion engineering	Overpotential, Current density, Tafel slope, Stability (X hours in KOH solution)	Corrosion engineering significantly improves the catalytic performance of bulk HEA	The catalytic activity of the bulk high-entropy alloy in OER was greatly improved through corrosion engineering.
Enhanced passivity of Cr-Fe-Co-Ni-Mo multi-component single-phase face-centred cubic alloys: design, production and corrosion behaviour	Precipitation-strengthened HEAs exhibit outstanding integration of strength and toughness at ambient temperature. Nevertheless, precipitates generally reduce the localized corrosion resistance in aggressive solution environments. To solve this problem, a strategy of introducing nano-sized L12 precipitates in CoCrFeNiAlTi HEAs has been proposed in this work. Results demonstrate the pitting corrosi…	Xueying Wang and Dimitri Mercier and Yolaine Danard and Thomas Rieger and Loïc Perrière and Mathilde Laurent-Brocq and Ivan Guillot and Vincent Maurice and Philippe Marcus	2022	Corrosion Science	10.1016/j.corsci.2022.110233	CoCrFeNiAlTi	Null	Aggressive solution environments	Cr-rich FCC matrix, L12 precipitates	Null	Localized corrosion resistance	Pitting corrosion potential, Localized corrosion resistance	Introduction of nano-sized L12 precipitates	The mechanisms of the nano-sized L12 precipitates on corrosion behavior were revealed, providing a strategy for designing corrosion-resistant HEA..
Controlling the mechanical properties and corrosion behavior of biomedical TiZrNb alloys by combining recrystallization and spinodal decomposition	IExcellent comprehensive mechanical properties and corrosion resistance of TiZrNb equiatomic ratio medium-entropy alloy were obtained through recrystallization and spinodal decomposition. In addition to solid solution strengthening and recrystallization, the excellent mechanical properties can also be attributed to the hindering effect of nanoprecipitation formed via spinodal decomposition on the…	Pengfei Ji and Bohan Chen and Shuguang Liu and Bo Li and Chaoqun Xia and Xinyu Zhang and Mingzhen Ma and Riping Liu	2022	Journal of Materials Science & Technology	10.1016/j.jmst.2021.09.034	TiZrNb	Null	Null	Null	Null	Recrystallization, Spinodal decomposition	Improved mechanical properties, Corrosion resistance	Combination of recrystallization and spinodal decomposition	This work provides a new strategy to control mechanical properties and corrosion resistance by combining recrystallization and spinodal decomposition.
Corrosion behavior of TiZrHfBeCu(Ni) high-entropy bulk metallic glasses in 3.5 wt. % NaCl	The corrosion behavior of TiZrHfBeCu(Ni) high-entropy bulk metallic glasses (HE-BMGs) has been investigated. The TiZrHfBeCu(Ni) HE-BMGs exhibited high corrosion resistance in 3.5 wt. % NaCl solution because of accumulation of ZrO2 and TiO2 in the passive film. Ni promoted increases of the ZrO2, TiO2, and HfO2 contents and a decrease of the BeO content, which improved the HE-BMG corrosion behavior…	Pan Gong, Ying Wang, Dongliang Wang, Cheng Zhang, Zahra Jamili-Shirvan, Kefu Yao, Xinyun Wang	2022	npj Materials Degradation	10.1038/s41529-022-00287-5	TiZrHfBeCu(Ni)	Null	in 3.5wt.% NaCl	Null	Null	Corrosion behavior	ZrO2, TiO2, and HfO2 contents, the BeO content	Null	Ni promoted increases of the ZrO2, TiO2, and HfO2 contents and a decrease of the BeO content, which improved the HE-BMG corrosion behavior.
Dynamic substrate reactions during room temperature heavy ion irradiation of CoCrCuFeNi high entropy alloy thin films	51.High entropy alloys (HEAs) are promising materials for various applications including nuclear reactor environments. Thus, understanding their behavior under irradiation and exposure to different environments is important. Here, two sets of near-equiatomic CoCrCuFeNi thin films grown on either SiO2/Si or Si substrates were irradiated at room temperature with 11.5 MeV Au ions, providing similar …	Timothy G. Lach, Chinthaka M. Silva, Yufan Zhou, Walker L. Boldman, Philip D. Rack, William J. Weber & Yanwen Zhang	2022	npj Materials Degradation	10.1038/s41529-022-00260-2	CoCrCuFeNi	Null	Room temperature, 11.5 MeV Au ion irradiation	Multi-silicide films	Heavy ion irradiation, SEM	Stability under irradiation	Radiation-enhanced diffusion	Inverse Kirkendall and solute drag effects.	Radiation environment alters stability and diffusion behavior in HEAs.
High electrocatalytical performance of FeCoNiCuPd high-entropy alloy for nitrogen reduction reaction	To search excellent catalyst for electrocatalytic nitrogen reduction reaction (eNRR) is of great importance for the alternative to the traditional Haber-Bosch process. Herein, based on density functional theory (DFT) calculations, we systematically investigated the catalytic mechanism of eNRR on different-proportions high-entropy alloy (HEA) FeCoNiCuPd. The calculation of formation energy shown t…	Yi-fan Yu; Wei Zhang; Fu-li Sun; Qiao-jun Fang; Jin-kong Pan; Wen-xian Chen; Guilin Zhuang	2022	Molecular Catalysis	10.1016/j.mcat.2022.112141	FeCoNiCuPd	Ni0.3(FeCoCuPd)0.175	Null	Null	density functional theory (DFT) calculations	catalytic mechanism of electrocatalytic nitrogen reduction reaction (eNRR)	lowest overpotential of 0.34 eV; selectivity of 99%; RDS barrier of 0.50 eV	design of high-entropy alloy FeCoNiCuPd with optimized Ni ratio (Ni0.3)	Ni0.3(FeCoCuPd)0.175 exhibits optimal eNRR performance due to d-band center modulation and Ni ratio’s critical role in activity/selectivity.
PtFeCoNiCu high-entropy solid solution alloy as highly efficient electrocatalyst for the oxygen reduction reaction	Searching for an efficient, durable, and low cost catalyst toward oxygen reduction reaction (ORR) is of paramount importance for the application of fuel cell technology. Herein, PtFeCoNiCu high-entropy alloy nanoparticles (PFCNCHEA) is reported as electrocatalyst toward ORR. It shows remarkable ORR catalytic mass activity of 1.738 A mg- 1 Pt at 0.90 V, which is 15.8 times higher than that of the …	Tao Chen; Fanghua Ning; Jizhen Qi; Guang Feng; Yucheng Wang; Jin Song; Tonghuan Yang; Xi Liu; Liwei Chen; Dingguo Xia	2022	iScience	10.1016/j.isci.2022.105890	PtFeCoNiCu	PtFeCoNiCu (high-entropy alloy nanoparticles, likely near-equimolar)	Null	Null	Electrocatalytic testing (ORR activity/stability), accelerated durability tests (10k cycles), proton exchange membrane fuel cell (PEMFC) evaluation	ORR catalytic performance, stability, and mechanisms in HEA nanoparticles	Mass activity (1.738 A mg⁻¹ Pt at 0.90 V), voltage decay (3 mV after 10k cycles), power density (1.380 W cm⁻² with 0.03 mgPt cm⁻² loading)	Multi-metallic HEA design (PtFeCoNiCu) leveraging ligand effects, electronic structure optimization, and multiple active sites for enhanced ORR	PtFeCoNiCu HEA nanoparticles achieve exceptional ORR activity and stability, demonstrating a breakthrough in low-Pt fuel cell catalyst design.
Tailoring oxidation resistance of Fe2CoCrNi0.5 based high entropy alloys by addition of alloying elements (Si, Cu and Si-Cu co-added)	Investigations about how to improve the properties of high entropy alloys (HEAs) play a key role in growing their potential for use in future industrial applications. Accordingly, this study aims to shed light on the effects of alloying elements (Si, Cu and Si-Cu co-added) on the microstructure and oxidation performance of the Fe2CoCrNi0.5 based high entropy alloys. To this end, a series of high …	Yiğit Garip	2022	Journal of Alloys and Compounds	10.1016/j.jallcom.2022.165951	FeCoCrNi-based HEA	Fe₂CoCrNi₀.₅, Fe₂CoCrNi₀.₅Si₀.₂₅, Fe₂CoCrNi₀.₅Cu₀.₂₅, Fe₂CoCrNi₀.₅Si₀.₂₅Cu₀.₂₅	Cyclic oxidation at 1123 K (850°C) in air for 1200 h	FCC solid solution (all alloys)	Electric current-assisted sintering (ECAS), oxidation kinetics, XRD/SEM-EDS analysis	Effects of Si/Cu addition on oxidation resistance, oxide scale composition, and internal oxidation behavior	The Fe₂CoCrNi₀.₅Si₀.₂₅ alloy exhibited the best oxidation resistance with minimal mass change (4.72 mg cm⁻²) and enhanced Cr-rich oxide formation, while Cu-added alloy (Fe₂CoCrNi₀.₅Cu₀.₂₅) showed the highest mass gain (15.92 mg cm⁻²) and thickest oxide scale (38.2 µm) with dual-layer structure (Fe-rich outer + Cr-rich inner oxide). Si-Cu co-addition did not alleviate internal oxidation but retain…	ECAS synthesis of Si/Cu-modified HEAs reveals Si promotes protective Cr-rich oxides, whereas Cu degrades resistance via Fe-rich oxide formation.	Si addition (Fe₂CoCrNi₀.₅Si₀.₂₅) optimizes cyclic oxidation resistance through Cr-rich passivation, positioning it as a superior candidate for high-temperature structural applications compared to Cu-containing variants.
The superior strength-ductility combination of a (Ni2FeCoCr)88.25-Al5Ti3W1.5Mo1.5Nb0.75 high entropy alloy enhanced with the heterogeneous microstructure via thermo-mechanical processing	A Ni-rich NiFeCoCr-based high entropy alloy (HEA) doped with (W, Mo, Al, Ti, Nb) was designed and prepared. After thermo-mechanical processing, the microstructure and tensile property was investigated. Via 80% reduction cold-rolling, 900 ◦C/20 min annealing and 750 ◦C/24 h aging, the alloy exhibits a superior combination of strength and ductility. The yield strength can reach up to 1823 MPa with …	Jiale Man; Baolin Wu; Guosheng Duan; Lu Zhang; Gang Wan; Yandong Liu; Claude Esling	2022	Materials Science & Engineering A	10.1016/j.msea.2022.144137	NiFeCoCr-WMoAlTiNb	Ni-rich NiFeCoCr + (W, Mo, Al, Ti, Nb) dopants (exact stoichiometry unspecified)	Thermo-mechanical processing (cold rolling + annealing/aging) and tensile testing at room temperature	Heterogeneous microstructure (recrystallized/non-recrystallized grains), dislocations, stacking faults, twins, micron (Ti,Nb)-rich phase, submicron σ phase, nano/sub-micron γ′ phase	80% cold rolling, annealing (900°C/20 min), aging (750°C/24 h), microstructure characterization (SEM/TEM), tensile testing	Role of thermo-mechanical processing in tailoring heterogeneous microstructures and multi-scale precipitates for strength-ductility synergy	Yield strength of 1823 MPa with 10.2% elongation, attributed to synergistic strengthening from dislocations, stacking faults, twins, and nano/sub-micron γ′/σ/(Ti,Nb)-rich phases.	Multi-phase heterogeneous microstructure design combining recrystallized/non-recrystallized grains, multi-scale precipitates, and defect networks (dislocations/twins) for ultra-high strength and retained ductility.	The NiFeCoCr-based HEA achieves exceptional mechanical properties (1823 MPa YS, 10.2% elongation) through optimized thermo-mechanical processing, enabling synergistic contributions from dislocation hardening, precipitation strengthening, and heterogeneous grain structure, advancing ultra-high-strength HEA design strategies
Corrosion behaviors related to the microstructural evolutions of as-cast Al0.3CoCrFeNi high entropy alloy with addition of Si and Ti elements	Complex multi-element alloys are gaining prominence for structural applica tions, supplementing steels, and superalloys. Understanding the impact of eachelementonalloysurfaces duetooxidation is vital in maintaining material integrity. This study investigates oxidation mechanisms in these alloys using a model five-element equiatomic CoCrFeNiMn alloy, in a controlled oxygen environment. The oxidati…	Xianyu Gu, Yanxin Zhuang, Dong Huang	2022	Intermetallics	10.1016/j.intermet.2022.107600	Al0.3CoCrFeNiSix, Al0.3CoCrFeNiTix	Si, Ti additions	NaCl solution	BCC (Si-added alloys), FCC (Si-added alloys), precipitated phases (Ti-added alloys)	Electrochemical potentiodynamic polarization, impedance spectroscopy, XPS analysis	Corrosion behaviors, microstructural evolutions	BCC/FCC phase ratio, XPS analysis (Cr³⁺, Fe³⁺, Ti⁴⁺)	Dual-phase regulation via Si and Ti for corrosion resistance	Therefore, as Ti with atomic percentage be equal to that of Al can effectively eliminate the negative influence of precipitated phases and microstructure on the corrosion resistance of alloys, meaning the Ti0.3 alloy had the best corrosion resistance in Tix alloys.
Superior anticorrosion performance of crystal-amorphous FeMnCoCrNi high-entropy alloy	In order to explore metal material with better corrosion resistance, this work presented a new crystal-amorphous FeMnCoCrNi high entropy alloy (HEA) mode as the mixture of nanocrystalline and amorphous shell fabricated by magnetron sputtering technique. Due to the wide and remarkable Cr-enrichment of amorphous shell, which provides higher driving force and diffusion rate for Cr atom, the crystal-…	Lili Xiao, Zhiqiang Zheng, Ping Huang, Fei Wang	2022	Scripta Materialia	10.1016/j.scriptamat.2021.114454	FeMnCoCrNi HEA	Nanocrystalline-amorphous hybrid structure	Magnetron sputtering fabrication	Amorphous shell (Cr-rich), nanocrystalline core	Magnetron sputtering, polarization testing, passive film characterization	Passive film formation and pitting resistance	Corrosion current density (0.147 nA·cm⁻²)	Cr-rich amorphous shell enhances passivation layer (40 nm).	Then, the crystal-amorphous FeMnCoCrNi HEA presented herein provides a new mode for developing advanced materials with outstanding anticorrosion ability.
Effect of Nb content on microstructure and properties of FeCoNi2CrMnV0.5Nbx high-entropy alloy coatings by laser cladding	The pitting corrosion resistance of austenite stainless steel was significantly reduced during tribocorrosion: corrosion pits with high density formed far below pitting potential. The aim of this study is to investigate the effects of tribocorrosion on the metastable pitting corrosion behaviour of 316 L stainless steel. The results indicated that the formation of a Cr-depleted layer on nanocrysta…	Rui Zhang and Xiaoyan Gu and Haotian Gong and Xiaopeng Gu and Xiaohui Zhao	2022	Journal of Materials Research and Technology	10.1016/j.jmrt.2022.10.144	FeCoNi2CrMnV0.5Nbx HEA	Nb additions (x = 0.8–1.2)	Laser cladding on ZG25MnNi steel	FCC (dendrite), FCC + Laves phase (interdendritic)	Laser cladding, microhardness testing, wear/corrosion resistance analysis	Dendrite structure evolution, Laves phase formation	Microhardness (631.1 HV), wear resistance (14.2× substrate)	Nb-induced FCC/Laves dual-phase strengthening	When the Nb content x was 0.8, FeCoNi2CrMnV0.5Nbx HEA coatings had the best corrosion resistance.
Prediction of electrochemical impedance spectroscopy of high-entropy alloys corrosion by using gradient boosting decision tre	Effects of environmental factors ([Cl–], [SO42–], and pH) on corrosion of CoCrFeAlNi2.1 high-entropy alloy were studied by electrochemical impedance spectroscopy (EIS) and machine learning (ML). Various ML models were employed to predict the impedance data of EIS. It was found that the [SO42–] and pH were positively corrected with –ZIm, whereas the [Cl–] was negatively corrected with –ZIm. The pH…	Boxin Wei and Jin Xu and Jingyu Pang and Zheng Huang and Jiajun Wu and Zheng Cai and Mengdi Yan and Cheng Sun	2022	Materials Today Communications	10.1016/j.mtcomm.2022.104047	CoCrFeAlNi2.1 HEA	Null	Environmental factors ([Cl⁻], [SO4²⁻], pH)	Null	EIS and machine learning prediction	EIS and machine learning prediction	R² (0.9491), MAE (2930.24), RMSE (13138.96)	GBDT algorithm for EIS prediction	The pH was the key feature impacting the corrosion of the HEA.
Economic Efficiency of High-Entropy Alloy Corrosion-Resistant Coatings Designed for Geothermal Turbine Blades: A Case Study	The aim of this paper is to establish the cost-effectiveness of high-entropy alloy coatings, using the electrospark deposition technique, designed for a geothermal turbine blade’s leading edge. The deposition of materials with high resistance to corrosion and erosion aims to increase the blade’s service life, reduce maintenance costs and improve production efficiency. According to our previous re…	Laura Elena Geambazu, Ionelia Voiculescu, Ciprian Alexandru Manea, Robert Viorel Bololoi	2022	Applied Sciences	10.3390/app12147196	CoCrFeNiMox HEA	Mo additions (x = 0.85)	Geothermal steam and saline solution	Null	Electrospark deposition, economic cost analysis	Economic efficiency and corrosion resistance	Maintenance cost reduction	Electrospark deposition for cost-effective coatings	From the calculation of the cost efficiency for the CoCrFeNiMo0.85 high-entropy alloy, it resulted that the deposition method and the properties of the material are suitable for the operating conditions, representing an efficient and easy to apply solution to reduce maintenance costs in the geothermal industry.
Effects of WC on the Microstructure, Wear and Corrosion Resistance of Laser-Deposited CoCrFeNi High Entropy Alloy Coatings	The development of antibacterial and antiviral high-entropy alloys (HEAs) incorporating copper has attracted widespread attention. However, the segregation of Cu in HEAs can result in detrimental effects on their mechanical properties and corrosion resistance. Herein, two novel HEAs, CoCrCu0.3FeNi-Ag(1.8 wt.%) (Cu-AgHEA) and CoCrFeNi-Ag0.6 (AgHEA), are designed to address these concerns. The yiel…	Tao Wu, Yunxiang Chen, Bo Lin, Litao Yu, Wanyuan Gui, Jiheng Li, Yuan Wu, Dawen Zeng	2022	Coatings	10.3390/coatings12070985	CoCrFeNi HEA/WC composite	WC additions (10–40 wt.%)	Laser cladding on H13 steel	FCC + WC particles	Laser cladding, friction coefficient measurement	Phase transformation, grain refinement	Friction coefficient, passivation behavior	WC-induced grain refinement and second-phase strengthening	In particular, an addition of 10 wt.% WC helped to significantly improve the corrosion resistance and ease of passivation of CoCrFeNi HEACC.
Microbiologically influenced corrosion of FeCoNiCrMn high-entropy alloys by Pseudomonas aeruginosa biofilm	Pseudomonas aeruginosa is widely found in industrial water and seawater. Microbiologically influenced corrosion (MIC) caused by P. aeruginosa is a serious threat and damage to the safe service of steel materials. In this study, the MIC behavior of FeCoNiCrMn high-entropy alloy (HEA) by P. aeruginosa biofilm was investigated in the simulated marine medium. The maximum pitting depth of the HEA coup…	Jike Yang, Yu Zhang, Weiwei Chang, Yuntian Lou, Hongchang Qian	2022	Journal of Materials Engineering and Performance	10.3389/fmicb.2022.1009310	FeCoNiCrMn HEA	Null	Simulated marine medium with P. aeruginosa biofilm	FCC	EIS, XPS, AES analysis	MIC behavior and passive film degradation	Pitting depth (4.77 μm)	MIC mechanism via Fe dissolution promotion	XPS and AES results further demonstrated that P. aeruginosa interfered with the distribution of elements in the passive film and significantly promoted the dissolution of Fe.
The Effect of Increasing Nickel Content on the Microstructure, Hardness, and Corrosion Resistance of the CuFeTiZrNix High-Entropy AlloysCuFeTiZrNix High-Entropy Alloys	In recent years, high-entropy alloys (HEAs) that contain ﬁne grains of intermetallic compounds (IMCs) have gained increasing attention as they have been shown to exhibit both high mechanical strength and strong corrosion resistance. One such class of HEAs is that of CuFeTiZrNi alloys. In this study, we have investigated the effect of increasing Ni content on the microstructure, hardness, and corr…	Po-Cheng Kuo, Sin-Yi Chen, William Yu, Ryo Okumura, Satoshi Iikubo, Andromeda Dwi Laksono, Yee-Wen Yen, Alberto S. Pasana	2022	Materials	10.3390/ma15093098	CuFeTiZrNix HEA (x = 0.1–1.0)	Ni additions	arc melting and annealing at 900°C	B2_BCC, FCC, Laves_C14, Cu51Zr14	arc melting, first-principles calculations	phase evolution, IMC formation	hardness vs. Ni content	Ni-induced FCC phase dominance improves corrosion resistance	Thirdly, as the Ni content in the CuFeTiZrNix alloys increased, the hardness decreased, but the corrosion resistance increased.
Wear and Corrosion Resistance of FeCoCrxNiAl High-Entropy Alloy Coatings Fabricated by Laser Cladding on Q345 Welded Joint	High-entropy alloy (HEA) coatings on the surface of low-alloy steel by laser cladding can improve the corrosion and wear resistance, and the performance can be further improved by adding the Cr element. However, the effect of Cr content on the microstructure, hardness, wear and corrosion resistance of the coatings on the welded joint has not been completely understood in the literature. This pape…	Qiang Ben, Yumeng Zhang, Longxiang Sun, Leilei Wang, Yanni Wang, Xiaohong Zhan	2022	Metals	10.3390/met12091428	FeCoCrxNiAl HEA (x = 1.5)	Cr additions	laser cladding on Q345 welded joint	FCC, BCC	laser cladding, salt spray testing	FCC/BCC phase ratio, oxide film formation	protective efficiency (WB:99.1%, HAZ:98.4%, BM:96.6%)	Cr enhances oxide film density in NaCl environment	Meanwhile, the corrosion resistance increases and then decreases, and reaches the highest when x=1.5.
Corrosion behavior of a non-equiatomic CoCrFeNiTi high-entropy alloy: A comparison with 304 stainless steel in simulated body fluids	A new type of non-equiatomic Co40Fe35Cr16Ni8Ti1 HEA was designed and synthesized, and its corrosion resistance was compared with 304 SS in Hank's simulated body fluids to verify its feasibility as an alternative for existing coronary stent materials. Electrochemical tests showed that the corrosion current density of Co40Fe35Cr16Ni8Ti1 HEA was 10−6 in order of magnitude, which was about 1/6 of tha…	Qingqing Lu and Xiaohong Chen and Wei Tian and Hao Wang and Ping Liu and Honglei Zhou and Shaoli Fu and Yuhang Gao and Maoyuan Wan and Xinjiao Wang	2022	Journal of Alloys and Compounds	10.1016/j.jallcom.2021.163036	Co40Fe35Cr16Ni8Ti1 HEA,	Non-equiatomic (Co, Fe, Cr, Ni, Ti)	Hank's simulated body fluids	Null	Electrochemical tests, SEM, XPS	Passive film composition, corrosion resistance	Corrosion current density, impedance value	Non-equiatomic design with enriched Cr/Ni in passive film.	Co40Fe35Cr16Ni8Ti1 HEA outperforms 304 SS in corrosion resistance due to Cr/Ni-rich passive film.
Corrosion behavior and surface characterization of an equiatomic CoCrFeMoNi high-entropy alloy under various pH conditions	The corrosion behavior and surface characterization of an equiatomic CoCrFeMoNi high-entropy alloy (HEA) under various pH conditions were investigated by Mott–Schottky measurements, EIS, polarization, and XPS. The results showed that the passive films formed on the HEA displayed the n–p heterojunction electronic structure due to the generation of different semiconducting constituents. As the pH i…	Zhu Wang, Guo-Hui Zhang, Xue-Hua Fan, Jie Jin, Lei Zhang, Yan-Xia Du	2022	Journal of Alloys and Compounds	10.1016/j.jallcom.2021.163842	CoCrFeMoNi HEA	Equiatomic CoCrFeMoNi	Various pH conditions	Null	Mott-Schottky, EIS, polarization, XPS	Passive film composition and stability	Donor density, passive film composition	n-p heterojunction structure in passive film	Cr and Mo enrichment in passive films enhances corrosion resistance; Fe stability improves with pH increase.
Mechanical properties and corrosion behavior of novel Al-Mg-Zn-Cu-Si lightweight high entropy alloys		Chengwei Jia, Aibin Ma, Jinghua Jiang	2022	Journal of Alloys and Compounds	10.1016/j.jallcom.2021.163918	Al35Mg30-xZn30Cu5Six	Al35Mg30-xZn30Cu5Six (x=5,10,15)	3.5 wt% NaCl solution	fcc, Al-Mg-Zn phase, Mg2Si phase, Si phase, eutectic phase	XRD, SEM, EDS, electrochemical testing	Microstructure and corrosion resistance	Compressive strength, phase content	Si/Mg ratio optimization for lightweight HEAs	Higher Si/Mg ratio improves mechanical properties and corrosion resistance.
Effect of thermally induced B2 phase on the corrosion behavior of an Al0.3CoCrFeNi high entropy alloy	The corrosion resistance of Al-Co-Cr-Fe-Ni high entropy alloys (HEAs) is probably affected by B2 phases. In this paper, the effect of B2 phases on the corrosion behavior of Al0.3CoCrFeNi HEAs in 3.5 wt% NaCl solution is clarified in this paper by purposely controlling the formation of B2 phases using annealing treatment. The microstructure characterization reveals that the content of (Al, Ni)-ric…	Z.J. Shi and Z.B. Wang and X.D. Wang and S. Zhang and Y.G. Zheng	2022	Journal of Alloys and Compounds	10.1016/j.jallcom.2022.163886	Al0.3CoCrFeNi HEA	Al0.3CoCrFeNi	3.5 wt% NaCl solution	B2 phase	Electrochemical measurements, SKPFM	B2 phase impact on corrosion	Pitting resistance, repassivation rate	Link between B2 phase and localized corrosion	B2 phases reduce corrosion resistance by promoting pit initiation and propagation.
Nano- and micro-mechanical properties and corrosion performance of a HVOF sprayed AlCoCrFeNi high-entropy alloy coating	In this work, a gas atomized feedstock was used to fabricate an AlCoCrFeNi HEA coating using the high-velocity oxygen fuel (HVOF) process. The coating’s resistance to room temperature surface degradation was evaluated using dry sliding wear and seawater corrosion testing. The coating retained the feedstock phase structure with negligible in-flight oxidation and was composed of a majority BCC phas…	Ashok Meghwal and Surinder Singh and Ameey Anupam and Hannah J. King and Christiane Schulz and Colin Hall and P. Munroe and Christopher C. Berndt and Andrew Siao Ming Ang	2022	Journal of Alloys and Compounds	10.1016/j.jallcom.2022.165000	AlCoCrFeNi HEA coating	AlCoCrFeNi	Seawater corrosion	BCC, B2	Nanoindentation, electrochemical testing	Wear and corrosion performance	Microhardness (~7 GPa), pitting resistance	HVOF processing for HEA coatings	Coating shows superior general corrosion resistance but poor localized resistance due to B2 phase.
Fabrication of hydrophobic AlCoCrFeNi high-entropy alloy and superior corrosion resistance to NTO aqueous solution	Hydrophobic AlCoCrFeNi high-entropy alloy (HEA) was prepared by electrochemical dealloying using 5% of weight percent H2SO4 aqueous solution at low temperature. The results of energy-dispersive spectrometer (EDS), X-ray diffraction (XRD) and X-ray photoelectron spectroscopy (XPS) analyses revealed that the element contents of Al and Ni were greatly reduced after dealloying treatment, leading to t…	Manman Wang, Qinghai Shu, Yansong Shi, Chien-Lung Teng, Junfeng Wang, Shaohua Jin, Shusen Chen, Jinfeng Qin, Dongxu Wang	2022	Journal of Alloys and Compounds	10.1016/j.jallcom.2022.164785	AlCoCrFeNi HEA	AlCoCrFeNi	NTO aqueous solution	BCC (Fe-Cr)	Electrochemical dealloying, XPS	Hydrophobicity and corrosion resistance	Contact angle (127°), polarization resistance	Dealloying-induced Cr enrichment	Hydrophobic surface and Cr-enriched oxide film improve corrosion resistance.
Development of a non-equimolar AlCrCuFeNi high-entropy alloy and its corrosive response to marine environment under different temperatures and chloride concentrations	This work aims to characterize the influence of temperature and chloride solution concentration on the corrosion behavior of a newly developed high-entropy alloy system (Al2Cr5Cu5Fe53Ni35) in a simulated marine environment. A direct correlation was found between temperature and chloride concentration with localized corrosion resistance. The Point Defect Model approach is employed to analyze the i…	L. Xue, Y. Ding, K.G. Pradeep, R. Case, H. Castaneda, M. Paredes	2022	Journal of Alloys and Compounds	10.1016/j.jallcom.2022.165034	Al2Cr5Cu5Fe53Ni35 HEA	Al2Cr5Cu5Fe53Ni35	Simulated marine environment (temperature and chloride variations)	Null	Point Defect Model, electrochemical analysis	Localized corrosion resistance	Critical temperature (60°C)	Non-equimolar HEA design for marine applications	Superior corrosion resistance attributed to Cr and Ni passivation.
Corrosion-resistant and interfacial conductive AlTiVCrMo high-entropy alloy and(AlTiVCrMo)Nx high-entropy ceramics coatings for surface modification of bipolar plates in proton exchange membrane fuel cells	Metal bipolar plates (BPPs) are candidates with great promise to replace conventional carbon-based BPPs. However, the drawbacks caused by the corrosion and passivation of metal bipolar plates need to be addressed urgently. In present study, corrosion-resistant and interfacial conductive high-entropy alloy and ceramic coatings possess great potential in the application of surface modification of b…	Weiqing Yan and Yiman Zhao and Yifan Zhang and Qian Li and Shunian Chen and Heng Yuan and Zhiqiang Zhang and Lin Chen and Jun Luo and Pan Pang and Guangyu He and Minju Ying and Bin Liao	2022	Journal of Power Sources	10.1016/j.jpowsour.2022.231217	AlTiVCrMo HEA, (AlTiVCrMo)Nx HEC	Nitrogen content variation (up to 28.12 at.%)	PEMFCs operating environment (acidic, humid)	BCC (HEA), amorphous/polycrystalline (HEC)	Co-filtered cathodic vacuum arc deposition	Microstructure, corrosion resistance, interfacial conductivity, hydrophobicity	Electrochemical corrosion resistance, interfacial contact resistance	Novel C-FCVAD technique for HEA/HEC coatings; dual enhancement of corrosion resistance and conductivity	AlTiVCrMo HEA and (AlTiVCrMo)Nx HEC coatings significantly improve corrosion resistance and conductivity of BPPs for PEMFCs.
Microstructure and corrosion behavior of CeO2/FeCoNiCrMo high-entropy alloy coating prepared by laser cladding	In this work, FeCoNiCogy. The macromorphology, microhardness and corrosion resistance of FeCoNiCrMo coating with rare earth oxides CeO2 were characterized in detail. ThrMo high-entropy (HEA) coating and CeO2/FeCoNiCrMo composite coating were successfully prepared on the surface of TC4 alloy by laser cladding technole addition of CeO2 powders reduced the crack sensitivity of HEA coating, and CeO2 …	Chen Cui and Meiping Wu and Xiaojin Miao and Zishuo Zhao and Yuling Gong	2022	Journal of Alloys and Compounds	10.1016/j.jallcom.2021.161826	FeCoNiCrMo HEA, CeO2/FeCoNiCrMo composite coating	CeO2 addition	3.5% NaCl solution	BCC	Laser cladding	Microstructure, microhardness, corrosion resistance (pitting inhibition)	Corrosion current density, polarization impedance	CeO2 addition refines grains and stabilizes passive film	CeO2/FeCoNiCrMo coating enhances corrosion resistance and mechanical properties of TC4 alloy.
Effect of temperature on the passive film structure and corrosion performance of CoCrFeMoNi high-entropy alloy	The effect of temperature on the passive film structure and corrosion performance of CoCrFeMoNi HEA was studied. The results indicated that the passive films exhibited a bilayer structure, where Co and Mo were segregated in the outer film, while Cr was enriched in the inner layer. The content of Fe and Mo species in the passive films decreased with rising temperature, leading to the passive film …	Zhu Wang and Jie Jin and Guo-Hui Zhang and Xue-Hua Fan and Lei Zhang	2022	Corrosion Science	10.1016/j.corsci.2022.110661	CoCrFeMoNi	Equiatomic CoCrFeMoNi	Temperature variation (50–60°C), NaCl solution	FCC phase (selective dissolution below 50°C)	Potentiodynamic polarization, EIS, XPS, ToF-SIMS	Passive film structure, corrosion performance	Critical pitting temperature (CPT), passive film composition	First report of CPT for equiatomic CoCrFeMoNi HEA	Passive film degradation and pitting corrosion correlate with temperature; CPT is 50–60°C.
A Co-free Cr-Fe-Ni-Al-Si high entropy alloy with outstanding corrosion resistance and high hardness fabricated by laser surface melting	In this paper, a CrFeNiAl0.2Si0.2 high entropy alloy (HEA) was fabricated via laser-surface melting (LSM). The result shows that, this HEA could form fully BCC structure under such rapid-solidification condition. Moreover, it exhibits excellent corrosion resistance in 3.5 wt% NaCl solution with two-stage passivation, and could maintain good protectiveness until 1.06 V vs SCE during electrochemica…	Chen Chen and Shuhan Yuan and Junli Chen and Wei Wang and Weiwei Zhang and Ran Wei and Tan Wang and Tao Zhang and Shaokang Guan and Fushan Li	2022	Materials Letters	10.1016/j.matlet.2022.131882	CrFeNiAl0.2Si0.2	Co-free Cr-Fe-Ni-Al-Si	3.5 wt% NaCl solution	BCC structure	Laser surface melting (LSM), electrochemical polarization	Corrosion resistance, passivation behavior, hardness	Hardness (~667 Hv), passivation potential (1.06 V vs SCE)	Co-free HEA design with rapid-solidification-induced BCC structure	High corrosion resistance and hardness achieved via LSM.
Effects of laser energy density on microstructure and corrosion resistance of FeCrNiMnAl high entropy alloy coating	In this work, FeCrNiMnAl high entropy alloy (HEA) coating was successfully prepared by laser cladding technology on 17-4PH stainless steel substrate. The aim of the study was to investigate the effects of laser energy density (Led = 50 ∼ 70 J/mm2) on the geometric characteristics, microstructure and corrosion resistance of HEA coatings. The results indicated that Led would significantly affect th…	He Rui and Wu Meiping and Cui Chen and Miao Xiaojin and Gong YuLing	2022	Optics & Laser Technology	10.1016/j.optlastec.2022.108188	FeCrNiMnAl	FeCrNiMnAl	3.5 wt% NaCl solution	Null	Laser cladding, electrochemical tests	Microstructure, corrosion resistance	Corrosion current density (1.156×10−5 A/cm2)	Optimization of laser energy density for HEA coating performance	Led=65 J/mm2 yields optimal corrosion resistance due to dense passive film.
Benefits of passive element Ti to the resistance of AlCrFeCoNi high-entropy alloy to corrosion and corrosive wear	Wear behaviors of 5-element AlCrFeCoNi and 6-element AlCrFeCoNiTi0.5 high entropy alloys (HEAs) against the Si3N4 ball respectively in 3.5 wt% NaCl and HCl (pH = 3) solutions were investigated. The role of the Ti addition in affecting microstructure, hardness, wear and corrosion of the HEA was analyzed. Results showed that the AlCrFeCoNiTi0.5 exhibited higher hardness, ascribed to the solid solut…	Mingyu Wu and Raymond C. Setiawan and D.Y. Li	2022	Wear	10.1016/j.wear.2021.204231	AlCrFeCoNiTi0.5	Ti addition (0.5 molar ratio)	3.5 wt% NaCl, HCl (pH=3)	BCC and FCC phases	Wear tests, AFM, electrochemical analysis	Corrosion, wear resistance	Hardness, wear loss, pitting resistance	Ti addition enhances passive film protectiveness	Ti improves corrosion and wear resistance via passive film stabilization.
Influence of plastic deformation on the corrosion behavior of CrCoFeMnNi high entropy alloy	In this research, the influence of plastic deformation on the corrosion behaviors of CrCoFeMnNi high entropy alloy were comprehensively investigated. As the degree of plastic deformation increases, both the acceptor density of the passive film and the thickness of the space charge layer increase, while the resistance of the passive film gradually weakens. The Fe and Cr oxides on the passive films…	Ying Wang and Junsong Jin and Mao Zhang and Famei Liu and Xinyun Wang and Pan Gong and Xuefeng Tang	2022	Journal of Alloys and Compounds	10.1016/j.jallcom.2021.161822	CrCoFeMnNi	Equiatomic CrCoFeMnNi	0.5 M H2SO4	FCC phase	Electrochemical tests, dislocation analysis	Passive film properties, corrosion resistance	Acceptor density, space charge layer thickness	Link between plastic deformation and passive film degradation	Severe plastic deformation lowers corrosion resistance.
Effect of annealing temperature on microstructure and corrosion behavior of CoCrFeMnNi high-entropy alloy in alkaline soil simulation solution	The effect of different annealing temperatures on the corrosion behavior of equiatomic CoCrFeMnNi high entropy alloy was investigated by electrochemical tests, immersion test, atomic force microscopy and X-ray photoelectron spectroscopy in alkaline soil simulation solution. The results show that with the increase of annealing temperature, the corrosion resistance of the HEA sample exhibits a tren…	Min Zhu and Baozhu Zhao and Yongfeng Yuan and Simin Yin and Shaoyi Guo and Guoying Wei	2022	Materials Chemistry and Physics	10.1016/j.matchemphys.2022.125725	CoCrFeMnNi	Equiatomic CoCrFeMnNi	Alkaline soil simulation solution	FCC phase	Annealing, XPS, AFM	Microstructure, passive film composition	Pitting resistance, Cr oxide content	Annealing temperature optimization for passive film stability	750°C annealing yields optimal corrosion resistance.
Phase constitution, surface chemistry and corrosion behavior of electrodeposited MnFeCoNiCu high entropy alloy-graphene oxide composite coatings	MnFeCoNiCu high entropy alloy (HEA) coatings with and without graphene oxide (GO) incorporation was deposited onto a mild steel substrate by the electrodeposition method. Coating morphology, phase constitution, corrosion properties, and coatings surface chemistry before and after corrosion in a 3.5 wt% NaCl solution was investigated. A predominantly body-centered cubic (BCC) phase with a minor fr…	Ahmed Aliyu and Chandan Srivastava	2022	Surface and Coatings Technology	10.1016/j.surfcoat.2021.127943	MnFeCoNiCu	MnFeCoNiCu with graphene oxide (GO)	3.5 wt% NaCl	BCC/FCC phases	Electrodeposition, XPS	Phase structure, corrosion resistance	Corrosion current density	GO incorporation for improved passive film stability	GO addition enhances corrosion resistance via oxide stabilization.
Microstructure, mechanical properties, and corrosion resistance of SiC reinforced AlxCoCrFeNiTi1−x high-entropy alloy coatings prepared by laser cladding	By introducing ceramic SiC particles, AlxCoCrFeNiTi1-x/SiC (x = 0.5,0.8 in molar ratio) high entropy alloy coatings (abbreviated as Al0.5, Al0.8, Al0.5/SiC, and Al0.8/SiC alloy coating respectively) were fabricated by laser cladding (LC) on the AISI1045 steel in this work. The microstructures, phase constitutions, mechanical and corrosion-resisting behaviors of the as-prepared coatings with and w…	Yiku Xu and Geng Wang and Qi Song and Xinyu Lu and Zhiyuan Li and Qinyang Zhao and Yongnan Chen	2022	Surface and Coatings Technology	10.1016/j.surfcoat.2022.128349	AlxCoCrFeNiTi1−x/SiC	Al0.5, Al0.8 with SiC	NaCl solution	L21, BCC, FCC phases	Laser cladding, wear tests	Microstructure, corrosion resistance	Hardness, friction coefficient, pitting potential	SiC reinforcement effects on HEA coatings	SiC improves hardness but reduces pitting resistance.
Revealing the deformation mechanisms of the heterogeneous structured CrMnFeCoNi high entropy alloy with ameliorated mechanical and corrosion resistance properties	Developing high entropy alloy (HEA) with both high strength and ductility is a longstanding challenge as potential structural materials. The strength and ductility trade-off can achieve via tailoring heterogeneous structures. Herein, a gradient structure with grain size variation from surface to center was successfully introduced into the CrMnFeCoNi HEA by ultrasonic nanocrystal surface modificat…	Yun Zou and Songlin Li and Yang Li	2022	Surface and Coatings Technology	10.1016/j.surfcoat.2022.128558	CrMnFeCoNi	Equiatomic CrMnFeCoNi	0.5 M H2SO4	FCC phase	UNSM, tensile tests	Deformation mechanisms, corrosion resistance	Strength, ductility, corrosion resistance	Heterogeneous structure design for balanced properties	UNSM enhances strength and corrosion resistance via microstructural refinement.
Improving anti-corrosion properties of CoCrFeMnNi high entropy alloy by introducing Si into nonmetallic inclusions	The microstructures and composition at and around inclusions in casted CoCrFeMnNi alloy were studied. It was found that the Cr-depletion zone caused by the formation of MnO·Cr2O3 was responsible for the corrosive catastrophe of the alloy. Si was introduced in the alloy to modify the microstructure and composition of the inclusions. Instead of forming harmful MnO·Cr2O3, stable amorphous MnO-SiO2 w…	K.P. Yu and S.H. Feng and C. Ding and P. Yu and M.X. Huang	2022	Corrosion Science	10.1016/j.corsci.2022.110616	CoCrFeMnNi	Si-modified CoCrFeMnNi	NaCl solution	FCC phase	Inclusion analysis, electrochemical tests	Inclusion modification, corrosion resistance	Cr-depletion elimination, passive film homogeneity	Si addition for inclusion engineering	Si-modified inclusions enhance corrosion resistance by stabilizing passive films.
Development of a Ti49Zr20Hf15Al10Nb6 high entropy shape memory alloy for biomedical applications	Titanium (Ti)-rich high entropy shape memory alloys (HESMAs) exhibit excellent mechanical properties and the biocompatibility of Ti alloys. Researches on the biomedical applications of the HESMAs are urgently needed to identify metallic biomaterials superior to the traditional Ni–Ti and Ti–6Al–4V (Ti64) alloys. In this study, a Ti-rich HESMA, designated as Ti49Zr20Hf15Al10Nb6 (in atomic percent, …	Zhaolin Hua and Lin Guo and Yun Zhang and Yilong Dai and Dechuang Zhang and Fangsheng Mei and Jianguo Lin	2022	Intermetallics	10.1016/j.intermet.2025.108711	Ti49Zr20Hf15Al10Nb6	Null	Hanks' solution	β phase (BCC)	Electrochemical measurements, biocompatibility tests	mechanical properties, corrosion resistance, biocompatibility	corrosion resistance, elastic modulus, wear resistance	Null	The Ti-rich HESMA demonstrated superior attributes in terms of strength, elastic modulus, wear and corrosion resistance, and biocompatibility when compared to Ni-Ti and Ti64 alloys.
Microstructure evolution of He-implanted high entropy alloy multilayers at elevated temperature	Dual-phase high entropy alloy (HEA) is considered as a promising He-tolerant material, due to their unique atomic-level microstructure and abundant heterogeneous interfaces. However, there is still a lack of explicit understanding of the microstructure evolution of He-implanted dual-phase HEAs at elevated temperatures, which hinders the development of advanced He-tolerant HEAs materials. In this …	Zhaoming Yang and Jialiang He and Maolin Lai and Guoqiang Zeng and Chunhai Liu	2022	Materials Characterization	10.1016/j.matchar.2025.114813	FCC/BCC HEA multilayers	He implantation	600°C annealing	FCC, BCC	Transmission electron microscopy (TEM)	microstructure evolution under He implantation	He tolerance, elemental diffusion	Null	It is found that the He tolerance of the FCC phase, the BCC phase and their interfaces is fundamentally different and varies with temperature.
Segregation enabled outstanding combination of mechanical and corrosion properties in a FeCrNi medium entropy alloy manufactured by selective laser melting	Selective laser melting (SLM) has the advantage in preparing supersaturated solid solutions due to its unique thermal field and high solidification rate. In this study, a face-centered cubic single-phase FeCrNi medium entropy alloy (MEA) with an ultrahigh Cr content (~35 at.%) was additively manufactured by SLM. The as-built MEA shows a hierarchical microstructure of coarse columnar grains and su…	Heng Duan; Bin Liu; Ao Fu; Junyang He; Tao Yang; C.T. Liu; Yong Liu	2021	Journal of Materials Science & Technology	10.1016/j.jmst.2021.05.018	FeCrNi	Null	Null	Null	Null	strength,passive film,corrosion resistance	σ0.2=745 MPa, σUTS=1007 MPa,0.06 μA cm−2	Null	The appearance of these dislocation barriers results in an excellent combination of strength (σ0.2=745 MPa, σUTS=1007 MPa) and ductility (εf=31%). The current MEA also shows a superb corrosion resistance with a corrosion current density of 0.06 μA cm−2 in 3.5 wt.% NaCl solution, which is far lower than that of 316 L.
Effect of alloying ratios and Cu-addition on corrosion behaviour of CoCrFeNiMo high-entropy alloys in superheated steam containing CO2, H2S and HCl	This article reports the morphology and corrosion study of CoCrNiFeMo and CoCrNiFeMoCu high-entropy alloys (HEA) tested in a simulated superheated geothermal environment to evaluate whether the alloys are candidate materials for a corrosive high-temperature geothermal environment. The HEA alloys with different alloying ratios were tested in superheated steam at 350 ◦C and 10 bar gauge containing …	Thorhallsson Andri Isak; Csáki Ioana; Geambazu Laura Elena; Magnus Fridrik; Karlsdottir Sigrun Nanna	2021	Corrosion Science	10.1016/j.corsci.2020.109083	CoCrNiFeMo and CoCrNiFeMoCu	Cu containing	in a simulated superheated geothermal environment, in superheated steam at 350 ◦C and 10 bar gauge containing HCl, H2S, and CO2	Null	Null	morphology and corrosion study	Null	Null	The Cu containing CoCrNiFeMoCu alloys were prone to corrosion damage and corrosion rate was accelerated by intermetallic Cu rich sites but the CoCrNiFeMo alloys were not prone to corrosion in the test environment
Corrosion behavior of Al0.4CoCu0.6NiSi0.2Ti0.25 high-entropy alloy coating via 3D printing laser cladding in a sulphur environment	3.High-entropy alloys (HEAs) are of great interest in materials science and engineering communities owing to their unique phase structure. HEAs are constructed with five or more principal alloying elements in equimolar or near-equimolar ratios. Therefore,they can derive their performance from multiple principal elements rather than a single element.In this work,three-dimensional printing laser cl…	Wan, Hongxia; Song, Dongdong; Shi, Xiaolei; Cai, Yong; Li, Tingting; Chen, Changfeng	2021	Journal of Materials Science & Technology	10.1016/j.jmst.2020.07.001	Al0.4CoCu0.6NiSi0.2Ti0.25	Null	Null	FCC, BCC	3D Printing, Laser cladding	Corrosion resistance, Hardness, Hydrophobicity	Hardness (X HV), Enhanced corrosion resistance, Hydrophobicity (contact angle Y degrees)	The formation of aluminum oxide on the surface of the coating enhances corrosion resistance and hydrophobicity	The HEA coating exhibited excellent corrosion resistance and hydrophobicity, showing potential for anti-corrosion applications.
Corrosion Behavior of ZrCrMoNb High-entropy Alloy Coating in Ethylene Glycol Solution	A novel ZrCrMoNb high-entropy alloy coating was prepared on 3A21 aluminum alloy and its corrosion behavior in ethylene glycol solution was studied. By polarization curve, electrochemical impedance spectroscopy (EIS) and scanning electron microscope (SEM), the effects of temperature and concentration of ethylene glycol on corrosion behavior of ZrCrMoNb high-entropy alloy coatings were analyzed. Th…	Zuo, HY ; Wang, L; Gong, M ; Zheng, XW; Liu, CH ; Fan, JL; Liu, F	2021	International Journal of Electrochemical Science	10.20964/2021.01.29	ZrCrMoNb high-entropy alloy coating	ZrCrMoNb	ethylene glycol solution with varying concentrations (V/V 15% to 30%) and temperatures	Null	polarization curve, electrochemical impedance spectroscopy (EIS), scanning electron microscope (SEM)	corrosion behavior (effects of temperature and ethylene glycol concentration), pitting corrosion resistance	corrosion current density (decrease with ethylene glycol concentration from 15% to 30%)	novel ZrCrMoNb high-entropy alloy coating on 3A21 aluminum alloy	The coating improves pitting corrosion resistance of 3A21 aluminum alloy; corrosion resistance degrades with temperature increase. Corrosion current density significantly decreases at 15%-30% ethylene glycol concentration and stabilizes beyond 30%.
Research Progress of Light-weight High-entropy Alloy	A novel ZrCrMoNb high-entropy alloy coating was prepared on 3A21 aluminum alloy and its corrosion behavior in ethylene glycol solution was studied. By polarization curve, electrochemical impedance spectroscopy (EIS) and scanning electron microscope (SEM), the effects of temperature and concentration of ethylene glycol on corrosion behavior of ZrCrMoNb high-entropy alloy coatings were analyzed. Th…	Zhou, PY ; Liu, HX; Zhang, XW ; Hao, XH ; Wang, YY; Chen, L	2021	Jinshu Rechuli/Heat Treatment of Metals	10.11933/j.issn.1007-9289.20210130001	light-weight high-entropy alloys	Null	Null	simple solid solution phases	Null	component design, preparation methods, microstructure, alloy properties (strength, hardness, high-temperature oxidation resistance, corrosion resistance)	high strength, high hardness, excellent high-temperature oxidation resistance, corrosion resistance	concept of high-entropy alloys providing a new direction for lightweight alloy development	Lightweight high-entropy alloys exhibit superior properties (e.g., strength, corrosion resistance) over traditional alloys due to high entropy, slow diffusion, lattice distortion, and cocktail effects, with future trends focusing on addressing existing challenges.
Microstructure formation mechanism and corrosion behavior of FeCrCuTiV two-phase high entropy alloy prepared by different processes	The microstructure and corrosion resistance of FeCrCuTiV high entropy alloy prepared by vacuum arc melting and laser melting deposition were studied. The microstructure and phase composition of FeCrCuTiV high entropy alloy were characterized by SEM, XRD, EBSD, etc. It is found that both of them are composed of the FCC Cu-rich phase, BCC Fe-rich phase and, BCC V-rich phase. Comparing with FeCrCuTi…	Xia, SQ; Xia, ZX; Zhao, D ; Xie, Y; Liu, X; Wang, L	2021	Fusion Engineering and Design	10.1016/j.fusengdes.2021.112792	FeCrCuTiV high entropy alloy	FeCrCuTiV	electrochemical corrosion of salt solution	FCC Cu-rich phase, BCC Fe-rich phase, BCC V-rich phase	SEM, XRD, EBSD; vacuum arc melting, laser melting deposition	microstructure, phase composition, corrosion resistance (comparison between vacuum arc melting and laser melting deposition)	grain size reduction (29.48 μm to 1.85 μm), Cu-rich phase volume fraction decrease (44.7% to 31.5%)	laser melting deposition technology for phase structure control	Laser melting deposition reduces grain size and Cu-rich phase content (due to higher cooling rate limiting grain growth and Cu segregation), improving corrosion resistance by weakening galvanic cell effects between Cu-rich (anode) and other phases.
Effects of Alloy Components and Contents on High Entropy Alloy Coatings by Laser Cladding : A Review	High entropy alloys are regarded as an innovation of alloying theory. They break the traditional design concept of alloy with one or two metal elements as components, and extend the alloy design system to the field with five or more elements as components. High entropy alloys have great potential for development because of the variety and adjustable content of elements. The coatings prepared by l…	Zhang, ZB; Zhang, SY ; Chen, YX ; Gao, YY; Liang, XB	2021	Zhongguo Biaomian Gongcheng/China Surface Engineering	10.11933/j.issn.1007-9289.20210512001	high entropy alloy coatings	Al, Ti, Nb, Mo, Ni, Si, B, C	Null	Null	laser cladding technology	corrosion resistance, hardness, friction and wear resistance, high-temperature oxidation resistance, influence of elements (Al, Ti, Nb, Mo, Ni, Si, B, C) on microstructure/properties	Null	combination of laser cladding and high-entropy alloys for surface modification	Laser-cladded high-entropy alloy coatings exhibit enhanced corrosion resistance, hardness, wear resistance, and oxidation resistance through element selection (e.g., Al, Ti, Mo), with future research needed to address current limitations and optimize composition design.
Effects of W addition on the Corrosion Behaviors of FeCoNiCrMn High Entropy Alloy Composites in the 3.5 wt.% NaCl solution	The effects of W addition on the corrosion behaviors of FeCoNiCrMn high entropy alloy composites in 3.5 wt.% NaCl solution are investigated in this study. The X-ray diffraction and scanning electron microscopy suggest that the quantity of added W particles results in the increasing quantity of particles in the composites and large amount of cohesionless phases covering the matrix occur in the all…	Zhou, ZY; Wang, L ; Zhao, XH; Wu, JL; Zhang, F ; Pi, JH	2021	Surfaces and Interfaces	10.1016/j.surfin.2021.100956	FeCoNiCrMn high entropy alloy composites	FeCoNiCrMnWx (W molar ratio: 0, 0.8, 1.0)	3.5 wt.% NaCl solution	Null	X-ray diffraction (XRD), scanning electron microscopy (SEM), electrochemical impedance spectra	corrosion behaviors, corrosion resistance	corrosion current density, corrosion potential (best corrosion resistance at 0.8 molar ratio W)	addition of W particles	W particles act as anodic sites, while Fe-Mn-Cr matrix acts as cathode, forming microgalvanic couples. Optimal W addition (0.8 molar ratio) enhances corrosion resistance, but excessive W (1.0 molar ratio) introduces cohesionless phases that degrade performance.
Research progress in corrosion resistance of high-entropy metallic glasses	The high-entropy metallic glasses, as a new kind of alloyed materials, have attracted considerable attention due to its excellent mechanical, anti-corrosion and magnetic properties and so forth, which combines the advantages of high-entropy alloys and metallic glasses. Herein, a comprehensive understanding of the concepts and features of high-entropy metallic glasses was provided as well as its p…	Zhang, SY; Gao, YY; Zhang, ZB; Liang, XB ; Wang, LZ	2021	Cailiao gongcheng	10.11868/j.issn.1001-1381.2020.000251	high-entropy metallic glasses	Null	Null	Null	Null	corrosion resistance mechanism, anti-corrosion properties	Null	combination of high-entropy alloys and metallic glasses; machine learning for design	Understanding corrosion failure mechanisms and optimizing preparation processes are critical for marine applications. Research on corrosion resistance and development of high-entropy metallic glasses supports China's marine industry advancement.
Effect of Sn and Mo on Microstructure and Electrochemical Property of TiZrTaNb High Entropy Alloys	The effects of Sn and Mo alloying elements on the microstructure and electrochemical properties of TiZrTaNb high entropy alloys were studied by optical microscope (OM), scanning electron microscopy (SEM), X-ray diffraction (XRD) and electrochemistry. TiZrTaNb, TiZrTaNbMo and TiZrTaNbSn alloys with equal atomic ratio were prepared by the arc melting method. The results showed that the microstructu…	Li, QY; Ma, TF; Jin, YL; Wang, XH; Dong, D ; Zhu, DD	2021	Crystals	10.3390/cryst11121527	TiZrTaNb high entropy alloys	TiZrTaNb, TiZrTaNbMo, TiZrTaNbSn (equal atomic ratio)	Null	BCC	optical microscope (OM), scanning electron microscopy (SEM), X-ray diffraction (XRD), electrochemistry	microstructure, electrochemical properties (corrosion parameters: I-corr, phi(corr), I-pass)	corrosion parameters (I-corr, phi(corr), I-pass)	addition of Sn and Mo alloying elements	Mo addition enhances corrosion resistance (TiZrTaNbMo alloy shows superior corrosion properties) compared to Sn, attributed to dendritic structure growth and interdendritic segregation influenced by alloying elements.
The comparative study of the microstructural and corrosion behaviour of laser-deposited high entropy alloys	Corrosion is a conservational occurrence that has a large economic impact on most metals and its alloys because it destroys and deteriorates most materials by an electrochemical process through the reaction of these materials with the environment. High Entropy Alloys in aerospace applications react with the environment in applications such as jet engines, especially at elevated temperatures. Thus…	Dada, M; Popoola, P ; Mathe, N; Pityana, S; Adeosun, S; Aramide, O	2021	Journal of Alloys and Compounds	10.1016/j.jallcom.2021.158777	AlCoCrFeNiCu and AlCoCrFeNiTi High Entropy Alloys	AlCoCrFeNiCu, AlCoCrFeNiTi	3.5 wt% NaCl solution	Null	X-ray diffraction (XRD), scanning electron microscope (SEM) with Energy Dispersion Spectroscopy (EDS)	corrosion behavior, microstructure, influence of laser processing parameters	scan speed’s influence on microstructure and corrosion behavior	Laser Additive Manufacturing (direct energy deposition)	Phase distribution and scan speed significantly influence corrosion behavior; localized corrosion susceptibility correlates with phase structure in laser-deposited alloys.
Current development of body-centered cubic high-entropy alloys for nuclear applications	High-entropy alloys greatly expand the alloy design range and offer new possibilities for improving material performance. Based on the worldwide research efforts in the last decade, the excellent mechanical properties and promising radiation and corrosion resistance of this group of materials have been demonstrated. High-entropy alloys with body-centered cubic (BCC) structures, especially refract…	Shi, T; Lei, PH; Yan, X; Li, J; Zhou, YD ; Wang, YP; Su, ZX; Dou, YK; He, XF; Yun, D ; Yang, W; Lu, CY	2021	Tungsten	10.1007/s42864-021-00086-6	BCC high-entropy alloys (refractory high-entropy alloys)	Null	high-temperature, high radiation damage, high stress, complex corrosive environment (nuclear reactors)	body-centered cubic (BCC)	Null	neutron economy and activation, mechanical properties, high-temperature stability, radiation resistance, corrosion resistance	Null	potential application of BCC high-entropy alloys in advanced nuclear reactors	Current research provides a basis for predicting material behavior, but further understanding of degradation mechanisms and characterization under reactor-like conditions is necessary, alongside critical candidate down-selection for engineering validation.
An Overview of High-Entropy Alloys as Biomaterials	High-entropy alloys (HEAs) have been around since 2004. The breakthroughs in this field led to several potential applications of these alloys as refractory, structural, functional, and biomedical materials. In this work, a short overview on the concept of high-entropy alloys is provided, as well as the theoretical design approach. The special focus of this review concerns one novel class of these…	Castro, Diogo; Jaeger, Pedro; Baptista, Ana Catarina; Oliveira, Joao Pedro	2021	Metals	10.3390/met11040648	biomedical high-entropy alloys	Null	Null	Null	Null	mechanical properties, biocompatibility properties, comparison with Ti6Al4V, processing routes	Null	novel biomedical high-entropy alloys as a class of HEAs	Biomedical HEAs show potential for applications requiring mechanical and biocompatibility properties comparable to Ti6Al4V, with further research needed on processing routes and performance optimization.
Research Progress of High Entropy Alloy Thin Films Prepared by Magnetron Sputtering	As a new alloy material, multi-principal component high-entropy alloy breaks the traditional alloy design concept of one or two main elements, and is composed of at least five main elements. The high entropy effect makes it have more advantages than traditional alloys in performance, such as high hardness, high strength, high temperature oxidation resistance, corrosion resistance, etc. The proper…	Luo Peng; Wang Xiaobo; Gong Chunzhi; Tian Xiubo	2021	Zhongguo Biaomian Gongcheng/China Surface Engineering	10.11933/j.issn.1007-9289.20210526001	high entropy alloy films	Null	Null	Null	direct current, radio frequency, ion beam, pulse magnetron sputtering	phase structure characteristics, properties (high hardness, high strength, high-temperature oxidation resistance, corrosion resistance), magnetron sputtering preparation techniques	high hardness, high strength, high-temperature oxidation resistance, corrosion resistance	application of magnetron sputtering technology for high-entropy alloy film preparation	Magnetron sputtering enables high-entropy alloy films with excellent properties (e.g., corrosion resistance, hardness) and dense structures, offering significant engineering potential; future development focuses on optimizing sputtering techniques and phase control.
Mechanically Alloyed CoCrFeNiMo0.85 High-Entropy Alloy for Corrosion Resistance Coatings	High-entropy alloys could provide a solution for corrosion resistance due to their impressive properties. Solid-state processing of high purity Co, Cr, Fe, Ni and Mo metallic powders and consolidation resulted in a bulk material that was further machined into electro spark deposition electrodes. After the stainless steel substrate surface preparation, thin successive layers of the high-entropy al…	Geambazu, Laura Elena; Cotrut, Cosmin Mihai; Miculescu, Florin; Csaki, Ioana	2021	Materials	10.3390/ma14143802	CoCrFeNiMo0.85 high-entropy alloys	CoCrFeNiMo0.85	3.5 wt.% NaCl solution for 6 h at room temperature	Null	electro spark deposition, Pull-Off testing	corrosion resistance, adhesion efficiency of coating	good adhesion (no cracks/exfoliations), validated corrosion resistance	solid-state processing and electro spark deposition of CoCrFeNiMo0.85 HEA as a coating	CoCrFeNiMo0.85 HEA coating exhibits effective corrosion resistance and strong adhesion to stainless steel substrate, validated by NaCl solution testing.
Recent advances on environmental corrosion behavior and mechanism of high-entropy alloys	In the past decade, the sudden rise of high-entropy alloys (HEAs) has become a research hotspot in the domain of metal materials. HEAs break through the design concept of traditional single-principal element alloys, and the four core effects, especially the high entropy and cocktail effects, make HEAs exhibit much better corrosion resistance than traditional corrosion-resistant metal materials, e…	Fu, Yu; Li, Jun; Luo, Hong; Du, Cuiwei; Li, Xiaogang	2021	Journal of Materials Science and Technology	10.1016/j.jmst.2020.11.044	high-entropy alloys (HEAs)	Null	various aqueous solutions	Null	Null	corrosion behavior/mechanism, correlation among composition/microstructure/corrosion resistance, influence of heat treatment, anodizing, and preparation methods	Null	high entropy and cocktail effects enhancing corrosion resistance compared to traditional alloys	HEAs exhibit superior corrosion resistance due to their unique effects; on-demand design of corrosion-resistant HEAs is a key future trend, guided by composition and processing optimization.
Corrosion Characteristics of TiNbMoMnFe High Entropy Thin Film Deposited on AISI316L for Biomedical Applications	High entropy alloys (HEAs) have received tremendous attention in different applications because of their excellent corrosion resistance and superior mechanical properties. In the present work, a novel TiNbMoMnFe high entropy alloy system was synthesized and deposited on AISI 316L by DC magnetron sputtering system. The microstructure of the resulting thin film was evaluated by grazing incidence X-…	Razazzadeh, Alireza; Atapour, Masoud; Enayati, Mohammad Hossein	2021	Metals and Materials International	10.1007/s12540-020-00908-1	TiNbMoMnFe high entropy alloy thin film	TiNbMoMnFe	Ringer's solution	crystalline solid solution (76 nm grain size), amorphous phase	grazing incidence X-ray diffraction (GIXRD), field emission electron microscope (FEEM)	corrosion resistance, pitting corrosion resistance, passive film stability, wettability	corrosion current density (0.024 μA cm⁻², 30% lower than uncoated 316L), contact angle (90° vs. 60° for uncoated)	novel TiNbMoMnFe HEA system deposited via DC magnetron sputtering on 316L	TiNbMoMnFe HEA thin film exhibits low corrosion current density, enhanced pitting resistance, stable passive film, and high wettability, demonstrating potential for biomaterial applications.
New TiTaNbZrMo high-entropy alloys for metallic biomaterials	The advantages of high entropy alloy with good comprehensive properties provide a potential opportunity to explore and develop new alloys suitable for human implantation. In this experiment, TiTaNbZrMo high entropy alloy was designed and prepared by alloy design and first principle. The calculation results predict that the phase composition of each high entropy alloy is BCC structure, and the des…	Li, Chenwei; Ma, Ying; Yang, Xu; Hou, Minghao	2021	Materials Research Express	10.1088/2053-1591/ac2f0b	TiTaNbZrMo high entropy alloy	Ti-30(NbTaZr)(60)Mo-10 (non-equal atomic ratio)	Null	BCC	alloy design, first principle calculations	structural stability, ductility, toughness (B/G ratio, Poisson’s ratio), wear resistance, corrosion resistance	yield strength (1132 MPa), plastic strain (33%)	non-equal atomic ratio design for improved ductility and toughness	Ti-30(NbTaZr)(60)Mo-10 alloy exhibits high strength, ductility, wear/corrosion resistance, and low Young’s modulus, validated by computational and experimental results, demonstrating potential for biomedical implantation applications.
A novel high-entropy alloy coating on Ti-6Al-4V substrate by laser cladding	TiZrAlNb and TiZrAlNbCo high-entropy alloys coatings are deposited by laser cladding on Ti-6Al-4V (TC4) alloy. The microstructure, hardness and corrosion resistance are studied. The results show that TiZrAlNb and TiZrAlNbCo high-entropy alloys coatings are BCC and BCC-FCC Matrix phases, respectively, accompanied by a small number of intermetallic compounds. The dendrite of TiZrAlNbCo alloy coatin…	Jiang, X. J.; Wang, S. Z.; Fu, H.; Chen, G. Y.; Ran, Q. X.; Wang, S. Q.; Han, R. H.	2021	Materials Letters	10.1016/j.matlet.2021.131131	TiZrAlNb and TiZrAlNbCo high-entropy alloys coatings	TiZrAlNb, TiZrAlNbCo	Null	BCC (TiZrAlNb), BCC-FCC Matrix phases (TiZrAlNbCo)	laser cladding	microstructure, hardness, corrosion resistance	hardness (768.944 HV), corrosion current density (3.66 × 10⁻⁹ A/cm²)	addition of Co inducing FCC phase formation	TiZrAlNbCo coating exhibits higher hardness and superior corrosion resistance (lower Icorr) due to FCC phase formation, which refines microstructure and enhances performance.
High Temperature Chloride Corrosion Behavior of 904L:AlFeNiMoNb High-Entropy Alloy	In order to obtain high cost-effective coating materials working in chlorine-containing environment at high temperature, a 904L super austenitic alloy modified by an AlFeNiMoNb alloy (904L:AlFeNiMoNb) was obtained by vacuum arc melting process. The 904L:AlFeNiMoNb high-entropy alloy has a similar phase component with the AlFeNiMoNb alloy, but a more homogenous microstructure than that of the AlFe…	Bai, Lingyun; Peng, Wenyi; Men, Dandan; Zhu, Jun; Wu, Xuecheng; Shi, Xiongtao; Xiang, Junhuan; Deng, Xiaohua; Wang, Yuqing; Sun, Zuxiang; Yu, Siqi; Wei, Xiang	2021	Frontiers in Materials	10.3389/fmats.2021.764928	904L:AlFeNiMoNb high-entropy alloy	904L modified by AlFeNiMoNb	N₂-2.6 vol.% CO₂-1.3 vol.% O₂-2700 vppm HCl gaseous environment at 700°C and 800°C for 55 h	Null	vacuum arc melting process, high-temperature chloride corrosion tests, morphology/composition analysis, thermodynamic calculation	high-temperature chloride corrosion resistance, weight change behavior	weight loss (904L: 10× higher at 800°C vs. 700°C; AlFeNiMoNb: 1.35138 mg/cm²; 904L:AlFeNiMoNb: 0.0118 mg/cm² at 800°C)	modification of 904L alloy with AlFeNiMoNb to form a high-entropy alloy	904L:AlFeNiMoNb exhibits superior high-temperature chloride corrosion resistance compared to 904L and AlFeNiMoNb, attributed to its homogeneous microstructure and reduced weight loss at 800°C.
Microstructure and properties of CoCrFeNiMo0.2 high-entropy alloy enhanced by high-current pulsed electron beam	Recently, high-entropy alloys have drawn lots of attention due to their outstanding properties. In this paper, a promising new surface modification technique was acted on CoCrFeNiMo0.2 high-entropy alloy to improve its mechanical and corrosion properties. CoCrFeNiMo0.2 high-entropy alloys were synthesized via vacuum arc melting then, their surfaces were processed by high-current pulsed electron b…	Lyu, Peng; Peng, Tao; Miao, Yingqi; Liu, Zijian; Gao, Qi; Zhang, Conglin; Jin, Yunxue; Guan, Qingfeng; Cai, Jie	2021	Surface and Coatings Technology	10.1016/j.surfcoat.2021.126911	CoCrFeNiMo0.2 high-entropy alloy	CoCrFeNiMo0.2	Null	face-centered cubic (FCC)	vacuum arc melting, high-current pulsed electron beam (HCPEB); X-ray diffraction (XRD), optical microscopy (OM), scanning electron microscopy (SEM), transmission electron microscopy (TEM)	microstructure, microhardness, wear resistance, corrosion resistance	microhardness (392.9 HV), wear rate (0.92 × 10⁻⁴ mm³·N⁻¹·m⁻¹ after 35-pulsed irradiation)	HCPEB surface modification for property enhancement	HCPEB irradiation improves microhardness, wear resistance (lowest wear rate at 35 pulses), and corrosion resistance (enhanced after 25 pulses) via surface homogenization, stress-induced dislocations/stacking faults, and FCC structure refinement.
The corrosion behavior and film properties of Al-containing high-entropy alloys in acidic solutions	Aluminum has shown promising application in reducing the high-entropy alloys' weight and enhancing their mechanical properties. In this work, the impact of solid-solution aluminum on the corrosion behavior and film properties of FeCoCrNiAlx (x = 0.1, 0.3) high-entropy alloy in 0.5 M H2SO4 and 0.5 M HCl solutions was investigated by electrochemical measurement, Auger electron spectroscopy, and X-r…	Fu, Yu; Dai, Chunduo; Luo, Hong; Li, Dongyue; Du, Cuiwei; Li, Xiaogang	2021	Applied Surface Science	10.1016/j.apsusc.2021.149854	FeCoCrNiAlx high-entropy alloy	FeCoCrNiAlx (x = 0.1, 0.3)	0.5 M H₂SO₄ and 0.5 M HCl solutions	FCC (FeCoCrNiAl0.3 remains stable FCC)	electrochemical measurement, Auger electron spectroscopy (AES), X-ray photoelectron spectroscopy (XPS)	corrosion behavior, passive film properties	Cr oxide content in passive film, film thickness	addition of solid-solution Al to reduce weight and enhance properties	Al increases corrosion resistance in H₂SO₄ by enhancing Cr oxide content and passive film thickness, but decreases resistance in HCl due to chloride-Al complex interaction accelerating dissolution.
Wear, erosion and corrosion behavior of laser cladded high entropy alloy coatings - A review	High entropy alloy is the new development in material compositions. It is a mixture of various metallic and non-metallic elements with different percentages of compositions. It has several superior properties compared to a traditional alloying system like good refractoriness, better resistance to a corrosive environment, excellent wear resistance due to high hardness, stability in various tempera…	Menghani, Jyoti; Vyas, Akash; Patel, Pringal; Natu, Harshad; More, Satish	2021	Materials Today: Proceedings	10.1016/j.matpr.2020.08.763	high entropy alloy coatings	Null	Null	Null	laser-assisted cladding process	wear, erosion, corrosion behavior	Null	laser cladding for enhanced properties (high melting rate, narrow heat-affected zone, metallurgical bonding)	Laser-cladded high-entropy alloy coatings exhibit superior wear, erosion, and corrosion resistance due to optimized processing and inherent alloy properties (e.g., corrosion resistance, hardness, temperature stability).
Evaluation of corrosion resistance of the single-phase light refractory high entropy alloy TiCrVNb0.5Al0.5 in chloride environment	A low density refractory high entropy alloy of composition TiCrVNb0.5Al0.5 was prepared by vacuum arc melting. Due to the formation of a single-phase BCC structure with uniform element distribution and a gradient passive film with a high concentration of passivating elements, the TiCrVNb0.5Al0.5 high entropy alloy (HEA) exhibits low corrosion current density (10(-7) similar to 10(-8) A cm(-2)), h…	Li, Mengjiao; Chen, Qingjun; Cui, Xia; Peng, Xinyuan; Huang, Guosheng	2021	Journal of Alloys & Compounds	10.1016/j.jallcom.2020.158278	TiCrVNb0.5Al0.5 high-entropy alloy (HEA)	TiCrVNb0.5Al0.5	3.5 wt% NaCl and 1M HCl solutions	single-phase BCC	vacuum arc melting	corrosion resistance	corrosion current density (10⁻⁷–10⁻⁸ A cm⁻²), breakdown potential (1.8–1.9 V-SCE)	single-phase BCC structure with uniform element distribution and gradient passive film enriched in passivating elements	TiCrVNb0.5Al0.5 HEA exhibits outstanding corrosion resistance in chloride environments due to its stable BCC structure and enhanced passive film, outperforming other HEAs, BMGs, and traditional alloys.
Effect of molybdenum content on the microstructure and corrosion behavior of FeCoCrNiMox high-entropy alloys	5.The effect of Mo content on the microstructure revolution and corrosion behavior of cast FeCoCrNiMox high-entropy alloys in chloride environments were investigated. Results indicate that FeCoCrNi and FeCoCrNiMo0.1alloys are in single FCC solid solution. The precipitates formin FeCoCrNiMo0.3 and increase in FeCoCrNiMo0.6 alloys. Pitting occurs on FeCoCrNi and FeCoCrNiMo0.1alloys while FeCoCrNiMo…	Chunduo Dai; Tianliang Zhao; Cuiwei Du; Zhi-yong Liu; Dawei Zhang	2020	Journal of Materials Science & Technology	10.1016/j.jmst.2019.10.020	FeCoCrNiMox	Mo content not specified	Chloride environments	Single FCC solid solution	 Corrosion tests, Electrochemical analysis	Corrosion resistance, Microstructure evolution	Corrosion resistance, Improved resistance with increasing Mo content	Effects of Mo content on corrosion behavior	The study confirmed that Mo addition improves the corrosion resistance of the material.
Effects of nickel content on the microstructure, microhardness and corrosion behavior of high-entropy AlCoCrFeNix alloys	38.In this study the effect of three different nickel concentration on the microstructure, hardness and corrosion properties of high entropy alloys (HEAs) from AlCrFeCoNi system as an alternative material for medical instruments fabrication was investigated. The analyzed HEAs were AlCrFeCoNix obtained by vacuum arc remelting from high purity raw materials and having nickel atomic ratio x = 1.0, 1…	M López Ríos 1, P P Socorro Perdomo 1, I Voiculescu 2, V Geanta 3, V Crăciun 4,5, I Boerasu 4, J C Mirza Rosca 1,✉	2020	Scientific Reports	10.1038/s41598-020-78108-5	AlCrFeCoNix atomic ratio x=1.0, 1.4, 1.8	Null	immersed in Simulated Body Fluid during one week	Null	vacuum arc remelting	microstructure, microhardness, corrosion behavior	corrosion rates, corrosion currents, polarization resistance	Nickle content	attest the good stability of these HEAs in simulated biological environment
Corrosion mechanism of an equimolar AlCoCrFeNi high-entropy alloy additively manufactured by electron beam melting	46.High-entropy alloys (HEAs) have emerged as a class of structural alloys with various attractive properties, and their application in additive manufacturing, which enables unprecedented thermal history and geometrical complexity, is promising for realising advanced materials. This study investigates the corrosion behaviour and passive film characteristics of an equimolar AlCoCrFeNi HEA additive…	Kenta Yamanaka, Hiroshi Shiratori, Manami Mori, Kazuyo Omura, Tadashi Fujieda, Kosuke Kuwabara & Akihiko Chiba	2020	npj Materials Degradation	10.1038/s41529-020-00127-4	AlCoCrFeNi	Null	3.5 wt% NaCl solution	B2 phase enriched with Cr	Additive manufacturing (Electron Beam Melting, EBM), Potentiodynamic polarisation, Electrochemical Impedance Spectroscopy (EIS)	Corrosion behavior and passive film characteristics	Corrosion resistance, Passivation current density, Charge-transfer resistance	Microstructural evolution caused by in “situ annealing” during EBM significantly enhances the passive film stability.	The bottom part of the EBM specimen exhibited better corrosion resistance due to enriched Cr and stable passive film formation.
Fe-based metallic glass reinforced FeCoCrNiMn high entropy alloy through selective laser melting	Improving the comprehensive mechanical properties of metallic materials has attracted great attentions. Here, FeCoCrNiMn high entropy alloy composite with combined high strength and toughness was fabricated by selective laser melting. The intriguing finding is that two different high entropy phases in addition to amorphous phase were detected at the high-entropy alloy and metallic glass interfaci…	Ning Li; Shixing Wu; Di Ouyang; Jianji Zhang; Lin Liu	2020	Journal of Alloys and Compounds	10.1016/j.jallcom.2020.153695	FeCoCrNiMn + Fe-based metallic glass			amorphous + two high-entropy phases	selective laser melting	interfacial phase formation and mechanical enhancement	strength >1000 MPa, fracture toughness >100 MPa·m1/2	interface phase enhances dispersion strengthening	High mixing entropy and atomic size difference promote new phase formation and performance
Effects of nitrogen content on microstructures and mechanical properties of (AlCrTiZrHf)N high-entropy alloy nitride films	The (AlCrTiZrHf)N high-entropy alloy nitride films were synthesized by reactive magnetron sputtering. The effects of different N2 flow rates on the microstructures and mechanical properties of (AlCrTiZrHf)N films were studied by the X-ray diffraction (XRD), scanning electron microscopy (SEM), high-resolution transmission electron microscopy (HRTEM), nanoindentation, coating friction and wear test…	Panpan Cui; Wei Li; Ping Liu; Ke Zhang; Fengcang Ma; Xiaohong Chen; Rui Feng; Peter K. Liaw	2020	Journal of Alloys and Compounds	10.1016/j.jallcom.2020.155063	(AlCrTiZrHf)N		varied N2 flow rates	amorphous → FCC	XRD, SEM, HRTEM, nanoindentation	structure-property relation under nitrogen variation	hardness 33.1 GPa, modulus 347.3 GPa, low friction	solid-solution and metal-nitride saturation strengthening	Films show strong mechanical and tribological performance for protective applications
FeCoNiCuAl high entropy alloys microwave absorbing materials: Exploring the effects of different Cu contents and annealing temperatures on electromagnetic properties	The FeCoNiCuxAl (x = 0.2–0.7) high-entropy alloy powders were synthesized by ball milling and then the prepared FeCoNiCu0.5Al powders were annealed at different temperatures (673K, 773K and 873K). The characteristics of powders were discussed, including microstructure, morphology, particle sizes, magnetic and electromagnetic properties. The crystal structures of powders are simple FCC and BCC pha…	Yuping Duan; Lulu Song; Yulong Cui; Huifang Pang; Xuefeng Zhang; Tongmin Wang	2020	Journal of Alloys and Compounds	10.1016/j.jallcom.2020.156491	FeCoNiCuxAl	x = 0.2–0.7	annealing at 673K, 773K, 873K	FCC + BCC	ball milling + annealing + magnetic/electromagnetic testing	microwave absorption under Cu/temperature variation	min RL −40.05 dB at 673K	soft magnetic + high conductivity + flaky morphology enhance RL	HEA powders exhibit excellent microwave absorbing potential
Formation and stability of C14 type Laves phase in multi component high-entropy alloys	The present investigation reports the formation and stability of multi-component AB2-type Laves phase in Ti–Zr–Ni (V, Cr, Fe, Mn, Co) ternary to octonary alloys system. To probe the formation and stability of AB2-type Laves phase in high-entropy alloys, a series of multi-component alloys have been synthesized via melting under protective Ar atmosphere and subsequent annealing at 525 K for 40 h. S…	S.S. Mishra; T.P. Yadav; O.N. Srivastava; N.K. Mukhopadhyay; Krishanu Biswas	2020	Journal of Alloys and Compounds	10.1016/j.jallcom.2020.153764	Ti–Zr–Ni–(V, Cr, Fe, Mn, Co)		annealed at 525K for 40h under Ar	C14 Laves phase	XRD + Rietveld + thermodynamics	stability of Laves phase in HEAs	phase identification and stability	VEC, δ, ΔHmix used to predict Laves phase	Valence/electron parameters control multicomponent Laves phase formation
Effect of FCC anti-ferromagnetic ordering on the stability of phases in Fe60-xMn30Cr10Cox high entropy alloys	The FCC-HCP martensitic transformation in High-Mn steels is strongly affected by the magnetic ordering of the FCC austenite which stabilizes this structure. This manuscript extends the analysis of relative phase stabilities and the effect of magnetic ordering to the FeMnCrCo high entropy alloys recently developed. The effect of Co addition on the martensitic transformation temperatures and magnet…	M.D. Acciarri; P. La Roca; L.M. Guerrero; A. Baruj; J. Curiale; M. Sade	2020	Journal of Alloys and Compounds	10.1016/j.jallcom.2020.153845	Fe60-xMn30Cr10Cox		varied Co content	FCC, HCP	magnetism and calorimetry	magnetic order effect on phase stability	martensite temp ↑, Néel temp ↓ with Co	anti-ferromagnetic state stabilizes FCC structure	Magnetic entropy change key to FCC-HCP transformation control
Comparative corrosion behavior of Fe50Mn30Co10Cr10 dual-phase high-entropy alloy and CoCrFeMnNi high-entropy alloy in 3.5 wt% NaCl solution	The corrosion behavior of a Fe50Mn30Co10Cr10 dual-phase high-entropy alloy (DP-HEA) in NaCl solution was investigated in this study. All the corrosion results were compared with those of an equiatomic CoCrFeMnNi high-entropy alloy (HEA). The corrosion product films that formed on the surface of both alloys after immersion in NaCl for 14 days were directly imaged for the first time through high-re…	Che-Wei Lu; Yi-Sheng Lu; Zen-Hao Lai; Hung-Wei Yen; Yueh-Lien Lee	2020	Journal of Alloys and Compounds	10.1016/j.jallcom.2020.155824	Fe50Mn30Co10Cr10; CoCrFeMnNi		3.5 wt% NaCl, 14 days immersion	dual-phase (Fe alloy), single-phase (CoCrFeMnNi)	HR-TEM, polarization, EIS, AES	corrosion resistance comparison in NaCl	Fe-alloy: 12 nm film, lower Epit; Ni-alloy: 3 nm film, better impedance	first HR-TEM image of corrosion films	CoCrFeMnNi has superior corrosion resistance to Fe-based DP-HEA
Novel welding of Al0.5CoCrFeNi high-entropy alloy: Corrosion behavior	Laser welding of Al0.5CoCrFeNi high-entropy alloy has been studied in detail. Base metal (BM) shows equiaxed grains with three different regions: (a) Cr–Fe rich, (b) Al–Ni rich phases and (c) Al-rich particle. Laser welding has resulted in evolution of columnar dendritic microstructure with dissolution of Al rich particles in the weld metal (WM), where dendrites are Cr–Fe rich and interdendrites …	R. Sokkalingam; K. Sivaprasad; M. Duraiselvam; V. Muthupandi; K.G. Prashanth	2020	Journal of Alloys and Compounds	10.1016/j.jallcom.2019.153163	Al0.5CoCrFeNi		laser welding, corrosion in NaCl	dendritic WM: Cr–Fe rich; interdendrites: Al–Ni rich	corrosion current density and polarization	weldment microstructure and corrosion	WM: 2.83×10⁻⁵ mA/cm²; BM: 8.63×10⁻⁶; Weldment: 4.11×10⁻⁶	WM acts cathodic due to nobler potential	Corrosion current minimized in BM+WM compared to WM alone
Effects of the element La on the corrosion properties of CrMnFeNi high entropy alloys	The effect of minor inclusion of rare earth element of lanthanum into a well-established high entropy alloy system of CrMnFeNi on their corrosion resistance properties in different media with various concentrations was investigated in this study. The potentiodynamic polarization curves of the CrMnFeNi and CrMnFeNiLa0.1 alloys in acidic solutions exhibit an extensive passive region (ΔE>1100 mV). T…	Y.P. Sun; Z. Wang; H.J. Yang; A.D. Lan; J.W. Qiao	2020	Journal of Alloys and Compounds	10.1016/j.jallcom.2020.155825	CrMnFeNi; CrMnFeNiLa0.1		acidic solution polarization test	passive layer	polarization, Nyquist, SEM, XPS	influence of La on corrosion/passivation	passive region ΔE >1100 mV	La alters Mn/Ni distribution in passive layer	La significantly impacts passivation behavior and resistance
In-situ visualization of corrosion behavior of AlxCoCrFeNi high-entropy alloys during electrochemical polarization	In the present study, the corrosion behavior of the AlxCoCrFeNi (x = 0.3, 0.5, 0.7) high-entropy alloys (HEAs) is investigated by an in-situ visualization system. Surface morphology changes on both micro-spatial and temporal scales are monitored in the 3.5 wt% NaCl solution during the potentiodynamic polarization. The microstructures of the AlxCoCrFeNi HEAs are characterized by SEM, EBSD, and EDS…	Yunzhu Shi; Jingke Mo; Feng-Yuan Zhang; Bin Yang; Peter K. Liaw; Ying Zhao	2020	Journal of Alloys and Compounds	10.1016/j.jallcom.2020.156014	Al0.3CoCrFeNi; Al0.5CoCrFeNi; Al0.7CoCrFeNi		in 3.5 wt% NaCl, polarization	FCC (x=0.3), FCC+BCC (x=0.5, 0.7)	in-situ visualization + EBSD + EDS	localized corrosion and phase impact	pitting in FCC; BCC corroded first in dual-phase	in-situ serration shows metastable pit propagation	Al0.3 alloy has best repassivation capacity
The corrosion behavior of ultra-fine grained CoNiFeCrMn high-entropy alloys	The ultra-fine grained (UFG) CoCrFeMnNi alloy (Cantor alloy) exhibits high mechanical strength. As far as its real application is concerned, the corrosion behavior of the UFG Cantor alloy should also be taken into account, which, however, has not been reported so far. In this paper, the UFG Cantor alloy was prepared using Cryo-rolling followed by short time annealing, and its corrosion behavior w…	Zhenhua Han; Weining Ren; Jun Yang; Ali Tian; Yuzhou Du; Gang Liu; Ran Wei; Guojun Zhang; Yuanqing Chen	2020	Journal of Alloys and Compounds	10.1016/j.jallcom.2019.152583	CoCrFeMnNi (UFG)		Cryo-rolled + annealed, in 3.5 wt% NaCl	σ phase in Cr-rich region	electrochemistry, EIS, microstructure analysis	corrosion in ultrafine vs coarse structure	higher corrosion rate in UFG than CG	galvanic corrosion between σ and matrix phase	σ phase and Cr-depletion lead to pitting and passivity loss
Effects of Mn on the electrochemical corrosion and passivation behavior of CoFeNiMnCr high-entropy alloy system in H2SO4 solution	The present work investigates the influence of Mn on the electrochemical corrosion and passivation behaviors of CoFeNiMnCr high-entropy alloys in a 0.1 M H2SO4 solution. Potentiodynamic polarization and electrochemical impedance spectroscopy (EIS) results showed that the addition of Mn caused a marked difference in the active dissolution regions and active-passive transition regions. It was deduc…	J. Yang; J. Wu; C.Y. Zhang; S.D. Zhang; B.J. Yang; W. Emori; J.Q. Wang	2020	Journal of Alloys and Compounds	10.1016/j.jallcom.2019.152943	CoFeNiMnCr		0.1 M H2SO4	passive film	polarization + EIS + surface analysis	corrosion and passivation behavior	passivation current density, dissolution rate	Mn altered dissolution rate but not passivation film composition	Mn increases dissolution rate but doesn't impact passivation stability significantly
Effect of Mo and aging temperature on corrosion behavior of (CoCrFeNi)100-xMox high-entropy alloys	The present work investigates the influence of Mo additive and aging temperatures on the microstructure and corrosion behavior in 3.5% NaCl solution. The microstructure of (CoCrFeNi)100-xMox(x = 1, 2, 3) alloys aged at 700 °C and 900 °C comprises single FCC solid solution structure. When the Mo content increases from 1% to 2%, the polarization curves and electrochemical impedance spectroscopy in …	Wenrui Wang; Jieqian Wang; Zhihui Sun; Jiangtao Li; Laifeng Li; Xin Song; Xiaodong Wen; Lu Xie; Xiao Yang	2020	Journal of Alloys and Compounds	10.1016/j.jallcom.2019.152139	(CoCrFeNi)100-xMox	x = 1, 2, 3	aged at 700°C and 900°C in 3.5% NaCl	FCC solid solution	EIS, XPS, polarization, first-principles calculation	corrosion resistance and passivation mechanism	film composition and pitting resistance	Mo and aging improve Cr2O3/MoO3 film stability	Moderate Mo improves corrosion resistance; excess Mo at high temp may reduce it
Microstructural evolution, mechanical and corrosion behaviors of as-annealed CoCrFeNiMox (x = 0, 0.2, 0.5, 0.8, 1) high entropy alloys	The CoCrFeNiMox high-entropy alloys (HEAs) (x = 0, 0.2, 0.5, 0.8, 1) are prepared by using an arc melting plus homogenization annealing method. The microstructural evolution, mechanical properties and corrosion resistance in seawater solution of the as-annealed HEAs are investigated. The results show that a new face-centered cubic (FCC’) phase precipitates from FCC matrix for the as-annealed Mo0.…	Zuozhe Niu; Yingzi Wang; Chuan Geng; Juan Xu; Yan Wang	2020	Journal of Alloys and Compounds	10.1016/j.jallcom.2019.153273	CoCrFeNiMox	x = 0–1	annealed, seawater corrosion test	FCC, FCC′, σ, μ, σ′	annealing + mechanical + corrosion testing	Mo-dependent phase, hardness, corrosion	microhardness ↑, corrosion ↓ with optimal Mo	identified σ′ embrittlement and Mo-controlled corrosion	Proper Mo enhances corrosion resistance; excess Mo leads to embrittlement
Influences of laser surface melting on microstructure, mechanical properties and corrosion resistance of dual-phase Cr–Fe–Co–Ni–Al high entropy alloys	In this paper, a laser surface melting (LSM) method was utilized on CrFeCoNiAlx (x = 0.5, 0.6, 0.7) high entropy alloys (HEAs) with FCC + BCC structure, and the effects of LSM on their microstructure, mechanical properties and corrosion behavior were systematically investigated. It is intriguing that, a layer with BCC + B2 structure formed on the surface of CrFeCoNiAl0.6 and CrFeCoNiAl0.7 substra…	Chen Chen; Hang Zhang; Suxin Hu; Ran Wei; Tan Wang; Yangyang Cheng; Tao Zhang; Nali Shi; Fushan Li; Shaokang Guan; Jianzhong Jiang	2020	Journal of Alloys and Compounds	10.1016/j.jallcom.2020.154100	CrFeCoNiAlx	x = 0.5, 0.6, 0.7	LSM treatment	BCC + B2 (treated), FCC (untreated)	laser surface melting + mechanical and corrosion tests	microstructure and corrosion resistance	↑ corrosion resistance and hardness in treated layers	LSM-induced phase affects corrosion positively with Al	LSM offers surface enhancement; Al effect differs by treated/untreated phase
Effects of nitriding on the microstructure and properties of VAlTiCrMo high-entropy alloy coatings by sputtering technique	The VAlTiCrMo and (VAlTiCrMo)Nx coatings were prepared by sputtering V–Al–Ti–Cr–Mo splicing targets. The microstructure and chemical composition were analyzed by means of X-ray diffraction (XRD), scanning electron microscope (SEM), energy dispersive spectrometer (EDS) and transmission electron microscope (TEM). The high-entropy alloy coating and the corresponding nitride coating have body-centere…	Ran Chen; Zhaobing Cai; Jibin Pu; Zhaoxia Lu; Shengyu Chen; Shujing Zheng; Chun Zeng	2020	Journal of Alloys and Compounds	10.1016/j.jallcom.2020.153836	(VAlTiCrMo)Nx		N2 flow 800 sccm, 3.5% NaCl corrosion	BCC (metal) → FCC (nitride)	XRD, SEM, TEM, corrosion test	structure-property change via nitriding	↑ hardness, ↑ corrosion resistance	Nitriding improves density and lattice structure	Optimized nitriding improves both mechanical and corrosion performance
Corrosion and Thermal Stability of CrMnFeNi High Entropy Alloy in Molten FLiBe Salt	The corrosion behavior of the FCC Cr18Mn27Fe27.5Ni27.5 high entropy alloy (HEA) after exposure to molten FLiBe salt at 700 °C for 1000 hours, has been investigated. Results show that the HEA lost a higher mass compared to the reference 316 H stainless steel due to the dissolution of Mn into the molten salt. The loss of Mn from the alloy appeared to discourage the dissolution of Cr in the molten f…	Mohamed Elbakhshwan 1, William Doniger 2, Cody Falconer 2, Michael Moorehead 3, Calvin Parkin 3, Chuan Zhang 4, Kumar Sridharan 3 2, Adrien Couet	2019	Scientific Reports	10.1038/s41598-019-55653-2	Cr18Mn27Fe27.5Ni27.5	Null	700°C for 1000hours, in Molten FLiBe Salt	FCC, BCC	Null	Corrosion and Thermal Stability	Null	Null	Results show that the HEA lost a higher mass compared to the reference 316H stainless steel due to the dissolution of Mn into the molten salt
Surface oxidation mechanism of a refractory high-entropy alloy	54.High-entropy alloys (HEAs) synthesized using refractory elements are being strongly considered as candidates for high temperature structural applications. The role of compositional changes of HEA surfaces due to oxidation is crucial to sustain the material properties, but a detailed description of the thermodynamic mechanism driving the adsorption of oxygen on such complex surfaces is absent. …	Eric Osei-Agyemang, Ganesh Balasubramanian	2019	Scientific Reports	10.1038/s41529-019-0082-5	Refractory High-Entropy Alloy (HEA)	Null	Temperature range 300–1500 K; Oxygen pressure down to 10−910^{-9}10−9 bar at 2000 K	Null	First-principles calculations, Atomistic thermodynamic modeling	Oxidation mechanism and oxygen adsorption on HEA surfaces	Reactivity to oxygen, Full monolayer coverage, Diffusion of oxygen into bulk regions	Detailed thermodynamic mechanism of oxygen adsorption and diffusion on refractory HEA surfaces	HEA surfaces exhibit high reactivity to oxygen, leading to stable oxygen adsorption even under extreme low-pressure conditions, making oxygen removal challenging.
Effect of nano-sized precipitates on the fatigue property of a lamellar structured high entropy alloy	Fatigue damage is inevitable and destructive for in-service structural materials and hence warrants a detailed examination of the fatigue behavior of potential structural materials such as high entropy alloys (HEAs). This study focused on investigation of the mechanical properties of Al0.7CoCrFeNi HEA with two microstructural conditions; i.e., a lamellar structure consisting of FCC + B2 phases (a…	Kaimiao Liu; Bharat Gwalani; Mageshwari Komarasamy; Shivakant Shukla; Tianhao Wang; Rajiv S. Mishra	2019	Materials Science & Engineering A	10.1016/j.msea.2019.06.012	AlCoCrFeNi	Al₀.₇CoCrFeNi HEA with two microstructures: (a) FCC+B2 lamellar without precipitates; (b) FCC (with L12 precipitates) + B2	Null	FCC + B2 (lamellar); FCC (L12-nanoprecipitates) + B2	Low-temperature annealing (L12 precipitation), tensile/fatigue testing, microstructure analysis (SEM/EBSD)	mechanical properties, fatigue crack initiation/propagation mechanisms	Tensile strength enhancement (with L12), fatigue resistance comparison (no improvement with L12)	Impact of L12 nanoprecipitates on fatigue vs. tensile behavior; role of persistent slip bands (PSBs) and phase boundaries in fatigue failure	L12 nanoprecipitates enhance tensile strength but do not improve fatigue resistance. Fatigue cracks initiate and propagate along persistent slip bands and FCC/B2 phase boundaries in both microstructural conditions.
Influence of Al content on high temperature oxidation behavior of AlxCoCrFeNiTi0.5 high entropy alloys	Studies on the oxidation behavior of high entropy alloys (HEAs) from the AlxCoCrFeNiTi0.5 (x = 0.5, 1.0, 1.5) metallic systems are conducted. In this work, the alloys are synthesized using arc-melting method, and the microstructure, anti-oxidant properties and oxidation products of the alloys at 700 °C, 900 °C and 1100 °C up to 100 h have been studied. The main substrate phases constitution in th…	S. Wang; Z. Chen; P. Zhang; K. Zhang; C.L. Chen; B.L. Shen	2019	Vacuum	10.1016/j.vacuum.2019.01.053	AlCoCrFeNiTi	AlₓCoCrFeNiTi₀.₅ (x=0.5,1.0,1.5)	at 700–1100°C for up to 100 h	BCC1 (FeCr-rich), BCC2 (FeCr-poor), FCC, σ intermetallic (suppressed with higher Al)	Arc-melting synthesis, oxidation kinetics analysis	Oxidation behavior and phase evolution under high-temperature oxidation	Oxidation rate constant (Kp = 1.03×10⁻¹² g² cm⁻⁴ s⁻¹ at 1100°C), (Al₀.₉Cr₀.₁)₂O₃ oxide layer formation in Al₁.₅ alloy	High Al content (x=1.5) enabling continuous (Al,Cr)-oxide layer for enhanced oxidation resistance	Al₁.₅CoCrFeNiTi₀.₅ alloy achieves optimal oxidation resistance via dense (Al,Cr)₂O₃ films, with Al content suppressing FCC/σ phases and stabilizing BCC-dominated microstructures.
Effect of nitrogen on corrosion behaviour of a novel high nitrogen medium-entropy alloy CrCoNiN manufactured by pressurized metallurgy	6.A novel high nitrogen medium-entropy alloy CrCoNiN, which had higher strength and slightly lower ductility than CrCoNi alloy, was successfully manufactured by pressurized metallurgy. The microstructure and corrosion behaviour were investigated by microscopic, electrochemical and spectroscopic methods. The results indicated that nitrogen existed in the form of Cr2N precipitates and uniformly dis…	Chunduo Dai; Tianliang Zhao; Cuiwei Du; Zhi-yong Liu; Dawei Zhang	2018	Journal of Materials Science & Technology	10.1016/j.jmst.2018.03.021	CrCoNiN	Null	Null	Cr2N precipitates, Nitrogen-enriched passive film	 Pressurized metallurgy, Electrochemical measurement	Corrosion resistance	Lower metastable pitting susceptibility, Thickness and integrity of the passive film	Nitrogen alloying enhances the corrosion resistance of the material	The addition of nitrogen significantly reduced metastable pitting susceptibility and formed a thicker, less defective passive film, enhancing corrosion resistance.
Effect of Zr on phase separation, mechanical and corrosion behavior of heterogeneous CoCrFeNiZrx high-entropy alloy	7.CoCrFeNi high entropy alloy (HEA) has attracted extensive attention due to its excellent corrosion resistance, but the low strength limits its engineering application prospects. In order to develop CoCrFeNi based HEAs with high strength, ductility and corrosion resistance, the effects of Zr content on the microstructure, mechanical properties and corrosion resistance of heterogeneous CoCrFeNiZr…	Hao; Feng; and; Huabing; Li; and; Xiaolei; Wu; and; Zhouhua; Jiang; and; Si; Zhao; and; Tao; Zhang; and; Dake; Xu; and; Shucai; Zhang; and; Hongchun; Zhu; and; Binbin; Zhang; and; Muxin	2018	Journal of Materials Science & Technology	10.1016/j.jmst.2021.08.062	CoCrFeNiZrₓ (x = 0, 0.25, 0.5, 1)	Varying Zr content	Null	FCC (x = 0, 0.25, 0.5), BCC (x = 1)	First-principles calculations	Strength, Ductility, Corrosion resistance	Yield strength (655 MPa for Zr0.25), Ductility, Corrosion resistance	Effects of Zr content on phase stability	The addition of Zr selectively enhanced mechanical properties and corrosion resistance..
Design of non-equiatomic high entropy alloys with heterogeneous lamella structure towards strength-ductility synergy	A non-equiatomic FeNiCoAlCrB (NCACB) high entropy alloy (HEA) with a heterogeneous lamella (HL) structureis fabricated through conventional thermomechanical processing. In the HL microstructure, fine-grain regions result from inhibited grain growth due to Zener pinning of boundaries by NiAl (B2) precipitates, while coarsegrained regions originate from grain growth within large deformation bands i…	Cheng Zhang; Chaoyi Zhu; Tyler Harrington; Kenneth Vecchio	2018	Scripta Materialia	10.1016/j.scriptamat.2018.05.020	FeNiCoAlCrB	Non-equiatomic FeNiCoAlCrB HEA with heterogeneous lamella (HL) structure	Null	Heterogeneous lamella structure with B2 (NiAl) precipitates	Conventional thermomechanical processing, EBSD (geometrically necessary dislocation density analysis), mechanical testing	mechanical behavior, back-stress strengthening mechanism, heterogeneous microstructure effects	High strength and ductility combination, dislocation density analysis	Heterogeneous lamella structure design via B2 precipitates and grain size control; back-stress strengthening mechanism	The HL-FeNiCoAlCrB achieves high strength and ductility through back-stress strengthening, driven by heterogeneous lamella structure (fine-grain regions pinned by B2 precipitates and coarse-grained regions). EBSD analysis confirms geometrically necessary dislocations as key to this mechanism.
The oxidation behavior of the quinary FeCoNiCrSix high-entropy alloys	The oxidation of three quinary FeCoNiCrSix high-entropy alloys (x ¼ 0.25, 0.5 and 1.0) was investigated at700e900 C in dry air and at 900 C in various O2-containing atmospheres (FeCoNiCrSi0.5 only). The two lower Si-content alloys contained an FCC single-phase structure, while the equimolar alloy had a BCC plus FCC dual-phase structure. The oxidation kinetics of all the alloys followed the parabo…	W. Kai; F.P. Cheng; C.Y. Liao; C.C. Li; R.T. Huang; J.J. Kai	2018	Materials Chemistry and Physics	10.1016/j.matchemphys.2017.06.017	FeCoNiCrSi	FeCoNiCrSiₓ (x = 0.25, 0.5, 1.0)	Oxidation at 700–900°C in dry air; FeCoNiCrSi₀.₅ also tested at 900°C under varying O₂ partial pressures	x = 0.25, 0.5: Single-phase FCC x = 1.0: Dual-phase BCC + FCC	xidation kinetics analysis (parabolic rate law), oxide scale characterization (XRD/SEM-EDS), oxygen partial pressure dependency testing	Effects of Si content and temperature/O₂ pressure on oxidation behavior, oxide scale composition, and diffusion mechanisms	Oxidation rate constants increased with higher temperature and lower Si content (e.g., FeCoNiCrSi₀.₂₅ > FeCoNiCrSi₁.₀) and with rising O₂ pressure for FeCoNiCrSi₀.₅, following p-type semiconductor scaling behavior. Oxide scales predominantly comprised Cr₂O₃ with minor α-quartz SiO₂, governed by outward cation diffusion.	Si content modulates phase structure (FCC → BCC+FCC) and oxidation kinetics, revealing Si’s dual role in stabilizing FCC and influencing oxide scale protectiveness.	Lower Si content (x ≤ 0.5) promotes single-phase FCC structure and faster oxidation rates due to reduced SiO₂ formation, while higher Si (x = 1.0) introduces BCC phase but slows oxidation. Dominant Cr₂O₃ scale and cation diffusion mechanism highlight design trade-offs for high-temperature FeCoNiCrSiₓ HEAs
Ultrahard bulk nanocrystalline VNbMoTaW high-entropy alloy	Coarse-grained high-entropy alloys (HEAs) have such excellent mechanical properties as high hardness and strength. The well-known Hall-Petch relation suggests that this high hardness should be further increased if the crystallite size of HEAs is decreased to nanometer scale. We prepared single-phased nanocrystalline (NC) refractory VNbMoTaW HEAs powders by mechanical alloying (MA). The achieved N…	S.W. Xin; M. Zhang; T.T. Yang; Y.Y. Zhao; B.R. Sun; T.D. Shen	2018	Journal of Alloys and Compounds		VNbMoTaW	Refractory HEA with V, Nb, Mo, Ta, W (single-phase BCC structure)	High-pressure/high-temperature (HPHT) consolidation at varying temperatures (optimized at 1150°C)	Nanocrystalline BCC phase with ~30 nm grain size post-consolidation	Mechanical alloying (MA) for nanocrystalline powder synthesis, HPHT consolidation, microstructure/phase analysis (TEM/XRD), hardness testing	Grain refinement via MA/HPHT, phase stability during consolidation, and mechanistic origins of ultrahigh hardness in nanocrystalline refractory HEAs	Hardness of 11.4 GPa (double coarse-grained counterparts) from synergistic solid solution, grain boundary, and dislocation hardening effects	MA+HPHT synthesis of nanocrystalline refractory HEAs validates Hall-Petch strengthening at nanoscale, achieving unprecedented hardness via triple strengthening mechanisms	Nanocrystalline VNbMoTaW HEAs consolidated at 1150°C exhibit ultrahigh hardness (11.4 GPa) due to BCC stability, nanoscale grains (~30 nm), and multi-mechanism hardening, advancing refractory HEA design for extreme mechanical performance
New soft magnetic Fe25Co25Ni25(P, C, B)25 high entropy bulk metallic glasses with large supercooled liquid region	New Fe20–35Ni20Cr20–30Mo5–15(P0.6C0.2B0.2)20 bulk metallic glasses with excellent thermal stability, strength, and corrosion resistance have been developed through the high-entropy alloy design strategy. The high-entropy bulk metallic glasses (HE-BMGs) possess larger supercooled liquid regions of ~69 K, higher crystallization onset temperatures of ~852 K, larger undercoolings of ~109 K, and more …	Yanhui Li and Wei Zhang and Tianlong Qi	2017	Journal of Materials Science & Technology	10.1016/j.jallcom.2016.09.144	Fe20–35Ni20Cr20–30Mo5–15(P0.6C0.2B0.2)20	Null	 Acids and NaCl Solutions	Null	High-entropy Alloy Design Strategy	Thermal Stability, Strength, Corrosion Resistance	Ultrahigh Strength (~3.4 GPa), Vickers Hardness (~1107)	Development of New Metal-metalloid HE-BMG System	The new metal-metalloid HE-BMG system exhibited excellent thermal stability, strength, and corrosion resistance.
Oxidation behavior of arc melted AlCoCrFeNi multi-component high-entropy alloys	Multi-component, high-entropy alloys (HEAs) are being investigated as potential alternatives for high temperature structural materials due to their reported high symmetry crystal structures, favorable mechanical properties, high temperature phase stabilities, and resistances to degradation in oxidizing/ corrosive environments. However, their high temperature oxidation behaviors are poorly underst…	Todd M. Butler; Mark L. Weaver	2016	Journal of Alloys and Compounds	10.1016/j.jallcom.2016.02.257	AlNiCoCrFe	Alₓ(NiCoCrFe)₁₀₀₋ₓ (x=8, 10, 12, 15, 20, 30 at.%)	Isothermal oxidation at 1050°C	FCC (low Al), BCC (high Al), Al₂O₃/Cr₂O₃/AlN oxide scales	Arc-melting synthesis, oxidation kinetics, CALPHAD thermodynamic modeling	High-temperature oxidation behavior, phase transitions, and oxide scale evolution with varying Al content	Improved oxidation resistance via continuous Al₂O₃ scales at higher Al content, parabolic oxide growth kinetics	Improved oxidation resistance via continuous Al₂O₃ scales at higher Al content, parabolic oxide growth kinetics	Increased Al content (≥15 at.%) enhances oxidation resistance by forming continuous Al₂O₃ layers, validated by experiments and CALPHAD predictions.
Ab initio-predicted micro-mechanical performance of refractory high-entropy alloys	49.Recently developed high-entropy alloys (HEAs) consisting of multiple principal elements represent a new field of metallurgy and have demonstrated appealing properties for a wide range of applications. Using ab initio alloy theory, we reveal the alloying effect on the elastic properties and the ideal tensile strength (ITS) in the [001] direction of four body-centered cubic (bcc) refractory HEAs…	Xiaoqing Li, Fuyang Tian, Stephan Schönecker, Jijun Zhao & Levente Vitos	2015	Scientific Reports	10.1038/srep12334	ZrNbHf, ZrNbHfTiV	Equimolar Zr, Nb, Hf, Ti, V	Null	BCC	Ab initio alloy theory	Micro-mechanical performance and alloying effects	Ideal tensile strength (ITS), Elastic anisotropy, Cauchy pressure	ITS enhancement through Ti and V substitution.	Alloying elements influence ITS and ductility, enabling intrinsically ductile HEAs with high strength.
